# Supplementary material for: Prospective Swiss cohort study of living-kidney donors: study protocol
Source: PubMed Central journal article supplement — BMJ Open. 2011 Nov 1;1(2):e000202. doi: 10.1136/bmjopen-2011-000202 (PMC3208897; doi:10.1136/bmjopen-2011-000202), 2011-11-01
Supplement: bmjopen-2011-000202.draft_revisions.pdf [file bmjopen-2011-000202.draft_revisions.pdf]

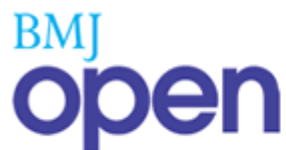

**Prospective Swiss cohort study of living-kidney donors -  
Study protocol**

|                                 |                                                                                                                                                                                                                                                                                                                                                                                                                             |
|---------------------------------|-----------------------------------------------------------------------------------------------------------------------------------------------------------------------------------------------------------------------------------------------------------------------------------------------------------------------------------------------------------------------------------------------------------------------------|
| Journal:                        | <i>BMJ Open</i>                                                                                                                                                                                                                                                                                                                                                                                                             |
| Manuscript ID:                  | bmjopen-2011-000202                                                                                                                                                                                                                                                                                                                                                                                                         |
| Article Type:                   | Protocol                                                                                                                                                                                                                                                                                                                                                                                                                    |
| Date Submitted by the Author:   | 07-Jun-2011                                                                                                                                                                                                                                                                                                                                                                                                                 |
| Complete List of Authors:       | Thiel, Gil; University Hospital of Basel, SOL-DHR auf der Klinik Abteilung Transplantationsimmunologie und Nephrologie<br>Nolte, Christa; University Hospital of Basel, SOL-DHR auf der Klinik Abteilung Transplantationsimmunologie und Nephrologie<br>Bachmann, Lucas; medignition Inc<br>Tsinalis, Dimitrios; University Hospital of Basel, SOL-DHR auf der Klinik Abteilung Transplantationsimmunologie und Nephrologie |
| <b>Primary Subject Heading</b>: | Renal medicine                                                                                                                                                                                                                                                                                                                                                                                                              |
| Keywords:                       | Renal transplantation < NEPHROLOGY, Transplant surgery < SURGERY, EPIDEMIOLOGY                                                                                                                                                                                                                                                                                                                                              |
|                                 |                                                                                                                                                                                                                                                                                                                                                                                                                             |

SCHOLARONE™  
Manuscripts

## Prospective Swiss cohort study of living-kidney donors - Study protocol

Gilbert T. Thiel<sup>1</sup>\*, Christa Nolte<sup>1</sup>, Dimitrios Tsinalis<sup>2</sup>

[1]

SOL-DHR (Swiss Organ Living Donor Health Registry)

At the Division of Transplant Immunology and Nephrology in the  
University Hospital of Basel, Switzerland

[2]

SOL-DHR (Division of Nephrology),  
Kantonsspital St. Gallen, Switzerland)

### \* Corresponding Author

Professor Gilbert T. Thiel, University Hospital of Basel, SOL-DHR auf der Klinik Abteilung  
Transplantationsimmunologie und Nephrologie, Petersgraben 4, Basel, 4056 Switzerland

### e-mail Addresses:

Gilbert T. Thiel: [gil.thiel@unibas.ch](mailto:gil.thiel@unibas.ch)

Christa Nolte: [cnolte@uhbs.ch](mailto:cnolte@uhbs.ch)

Dimitrios Tsinalis: [dimitrios.tsinalis@kssg.ch](mailto:dimitrios.tsinalis@kssg.ch)

## ABSTRACT

*Background* Offering living kidney donation raised the concern that donors are exposed to unknown risks. All Swiss transplant centres therefore decided to start a prospective cohort study of living kidney donors in Switzerland. This paper describes the rationale and set-up of this cohort.

*Methods/Design* All consenting eligible kidney donors are registered and examined before and biennially starting in the first year after nephrectomy. In the lead-up of a follow-up visit, the study center sends a little parcel to the kidney donor containing the health questionnaire, blood and urine tubes and a pre-paid envelope for sending the probes to the central laboratory. The donor makes an appointment with his family physician. At the consultation, body weight and sitting blood pressure is measured, followed by an inspection of the nephrectomy scar. Then, the questionnaire assessing the current health status including medications is filled. Blood and urine samples are sent to the central laboratory for examination. A urine dip-stick test is made and, if positive for blood, protein, white blood cells and other abnormalities, an microscopic examination is performed. All data are centrally managed at the cohort headquarter. All abnormalities are regularly discussed with the principle investigator and all necessary measures are taken. Any intervention is stored in the database. The health-insurance of the organ-recipient covers all costs of the donor-follow-up. Main outcomes are the occurrence of albuminuria, hypertension and renal insufficiency.

*Discussion* This prospective cohort offers unique opportunities assessing the risks of living kidney donation and allows examining risk differences for all available methods used for nephrectomy in Switzerland (various forms of open surgery and endoscopic nephrectomy). Moreover, the systematic collection of all clinically relevant data and the monitoring of participants on a regular basis allow timely interventions if critical parameters of kidney function or general health change for the worse.

## BACKGROUND

Living kidney donors were used in Switzerland since 1967 but at a low rate. This, however, changed in the early nineties. Rapid expansion of live kidney transplantation took place especially in one large Swiss transplant centre, where live kidney was formerly strictly disapproved over two decades because of ethical reasons. But the rising number of live donor transplantation was not well accepted from all sides. A lawyer wrote in the Swiss Medical Journal that “organ removal from a living person for transplantation is an intended bodily injury according to civil and criminal law”<sup>1</sup>. Concerns were raised over the safety of live organ donation for the donors. The available published data from retrospectively collected data came from far away and were largely incomplete. The percent of missed donors ranged from 21%<sup>23</sup> to 31%<sup>4</sup>, to 42%<sup>56</sup> up to 77%<sup>7</sup>. Prospective cohort studies of living donors were not generally regarded as necessary. Thus, any fair counselling of potential living donors was impossible for us, all the more that no Swiss data on donor risk were available at that time.

Since living donor transplantation was mainly propagated by the Basel transplant centre, we felt obliged to offer a long-time follow-up of the health state of living organ donors for all Swiss transplant centres. This idea was well accepted by the other 5 Swiss centres (Bern, Geneva, Lausanne, St. Gallen and Zürich) and consequently, the cohort study by the name of SOL-DHR (Swiss Organ Living Donor Health Registry) was initiated in April 1993.

This paper describes the rationale and set-up of this prospective cohort study aiming at assessing the prevalence of complications of living kidney donation and aiming at identifying risk profiles associated with unfavourable outcomes.

## METHODS / DESIGN

Prospective cohort study: There was an a priori consensus among the founding members that health state of all consenting eligible living kidney donors should be assessed life-long at regular time intervals in the context of a prospective cohort study. The responsible Ethics committees approved the protocol and we are obtaining informed consent from all participants.

### Main objectives

- Gaining prospective outcome data from living kidney donors in Switzerland
- Assess and quantify the risks for early and late complications due to organ removal
- Improve the information given to potential donors before agreeing to donate a kidney
- Install a system of timely intervention in case of deterioration in state of health
- Compare the consequences of different methods of organ removal on state of health
- Provide a neutral platform, where donors can express complains and receive help

### Data collection principles

Study inclusion and a first medical examination before kidney donation is done by the transplant centre. Thereafter the study centre organises the follow-up after nephrectomy at 1 year, 3 years, 5 years, 7 years, 10 years and biennially thereafter. The kidney donors are examined by their family physicians (free choice of donor to select the doctor) in the vicinity where they live. In the lead-up of a follow-up visit, the study centre sends a little parcel to the kidney donor containing the brief information for the donor and the family physician, a health questionnaire, blood and urine tubes and a pre-paid envelope for sending the probes to the

1  
2  
3 central laboratory (Viollier AG Basel). The donor makes an appointment with his family  
4  
5 physician.  
6  
7

8  
9 The family physician is requested to measure body weight, sitting blood pressure (3 times),  
10  
11 examine the nephrectomy scar, ask all questions necessary to fill-out the medical  
12  
13 questionnaire including the question about pain or new problems since the last examination,  
14  
15 to note all drugs currently taken, make a dip-stick examination of the urine and finally fill a  
16  
17 blood and a urine tube and send both tubes to the central laboratory. If the urinary dip stick  
18  
19 turns out to be positive for blood, protein, white blood cells and other abnormalities, the  
20  
21 doctor has to make an additional microscopic examination of the urinary sediment. All  
22  
23 clinical data, including the health state questionnaire, are sent to the study centre SOL-DHR.  
24  
25  
26

27  
28 The central laboratory sends all results of the analyses to the family physician and to the  
29  
30 cohort manager.  
31  
32  
33  
34  
35

### 36 **Participation of family physicians**

37

38  
39 Whereas kidney recipients live usually in the area of the transplant centre, kidney donors  
40  
41 often do not. Asking donors to travel lifelong biannually to the distant transplant centre for  
42  
43 control has little chance to be followed, particularly since travel expenses are not covered.  
44  
45 Follow-up controls done by the family physician working in the vicinity of the donor improve  
46  
47 donor's willingness to participate manifold. Family physicians as well as young medical  
48  
49 assistants at the transplant centre follow the protocols provided by the study centre.  
50  
51  
52  
53  
54  
55  
56  
57  
58  
59  
60

## Collected data

### *Laboratory data*

We quantify creatinine in blood and urine, albumin and protein in urine. The method used to quantify Creatinine in blood changed over the years: 1993 -1996 Jaffee, 1997 -2003 enzymatic assay (Roche), 2004 – 2005 “Jaffe compensated” (Roche), 2006 – 2007 “Jaffe corrected” (Siemens). Since September 2007 enzymatic assay (Siemens). In order to avoid systematic errors due to different assays prior to the data base entry all values are converted to values traceable to isotope dilution mass spectrometry (IDMS) as recommended by the KDIGO consensus conference<sup>8</sup> using calibration data supplied by the assay’s manufacturers (data available on request). Albumin in urine is measured by turbidimetry after antigen-antibody reaction using the endpoint method (Roche Diagnostics). Protein in urine is measured by turbidimetry after exposure to benzethoniumchloride.

## Definitions

### *Estimation of the glomerular filtration rate (GFR)*

To estimate GFR, we use the MDRD equation for IDMS-traceable creatinine values<sup>9</sup>

eGFR (mL/min/1.73 m<sup>2</sup>) =

$$175 \times (\text{Scr}/88.4)^{-1.154} \times (\text{Age})^{-0.203} \times (0.742^*) \times (1.212^+) \text{ * If female + If African}$$

### *Micro-albuminuria and macro-albuminuria*

We assume a daily urinary excretion of 10 mmol Creatinin/24h as being normal for donors (mean value for both genders taken together, - underestimating it for males, overestimating for females). The cut-off-point for albuminuria to be called micro-albuminuria is set to an albumin/creatinine-quotient of at least 5 mg albumin / mmol creatinine. Assuming a daily

1  
2  
3 urinary excretion of 10 mmol creatinine, this cut-off gives an estimation of 50 mg albumin per  
4  
5 day instead of the commonly used 30 mg. We refrain from using a cut-off of 3 mg albumin /  
6  
7 mmol creatinine, as many donors having a creatinine excretion below 10 mmol/d would be  
8  
9 misclassified as having microalbuminuria, while donors with a quotient of 5mg/mmol run a  
10  
11 very high chance that this is correct and not just a borderline state fluctuating between mini-  
12  
13 micro-albuminuria and no micro-albuminuria.  
14  
15

16  
17  
18 For the definition of macro-albuminuria, which is identical with the term proteinuria, we use  
19  
20 300 mg albumin / 10 mmol creatinine or 30 mg albumin / mmol creatinine.  
21  
22

### 23 24 25 26 *Hypertension*

27  
28 Donors having a systolic pressure above 140 mm Hg or diastolic above 90 mmHg or both or  
29  
30 taking any antihypertensive drug are classified as hypertensive. In any case of new onset  
31  
32 hypertension, we ask the family physician to perform a 24h pressure recording. If  
33  
34 hypertension is confirmed, we recommend antihypertensive treatment with ACEI or an  
35  
36 Angiotensin receptor antagonist (ARA).  
37  
38  
39  
40  
41  
42  
43

### 44 **Health state data**

45  
46 At each visit, the family physician is asked to measure the actual weight, height and blood  
47  
48 pressure (3 times in sitting position). Moreover he is requested to examine the bare abdomen  
49  
50 of the donor in an upright posture in order to look for an incisional hernia or abdominal wall  
51  
52 bulging caused by the nephrectomy. When the donor is complaining about pain at any specific  
53  
54 place (i.e. lumbar back pain), it should be examined and evaluated, whether it is or could be  
55  
56 causally related to nephrectomy. New complains, disease or any problems (somatic, mental,  
57  
58 social) need to be mentioned carefully in a separate line of the form.  
59  
60



## Questionnaires

- The basic medical questionnaire:

Containing information on body weight, sitting blood pressure (3 times), description of the nephrectomy scare, pain or new problems since the last examination and an inventory of all drugs currently taken. The questionnaire before donation also includes “major disease and back pain”, since we realize that back pain is such a common complaint that we need information before donation in order to classify back pain after donation in a meaningful way.

- Early complication questionnaire (since 1998):

This questionnaire is asking about the side and method used for nephrectomy and all complications occurring peri- and postoperatively including blood-transfusions, whether the endoscopic procedure had to be changed intraoperatively and whether surgical revision was necessary. Postoperative pain is assessed using the visual analogue scale. The questionnaire is filled out usually 2 weeks after nephrectomy. For grading early complications we use the Clavien-Scale<sup>10</sup>. Every early complication observed in a donor is classified along the Clavien scale (Grade I=1, grade II=2, grade IIIa =3, grade IIIb=3.5, grade IVa=4, grade IVb=4.5 etc.). If multiple complications occur in the same donor, the single Clavien scores are added to what is called the Clavien-Sum per donor score as compared to the simple sum of observed complications per donor score. The two sums have different interpretations. For a given (sub) population of donors, i.e. older than 60 years, the “mean sum of complications” shows the frequency of early complications seen in elderly donors, the mean Clavien sum” however, their severity.

- 1  
2  
3 - SF-8 questionnaire (since 2002).  
4

5 (The questionnaire is supplemented by three own questions: In comparison to the last  
6 year how would you describe your actual health, how has your emotional relation to  
7 the kidney recipient changed since donation? Would you donate a kidney again, if you  
8 still had two kidneys?). These questions are obviously not used for calculating the  
9 PSC (Physical Component Summary) or MCS (Mental Component Summary), but are  
10 considered separately.  
11  
12  
13  
14  
15  
16  
17  
18

- 19  
20 - Social status questionnaire (since 2002).  
21

22 This instrument has been developed by ourselves and contains questions about the  
23 actual professional activity, working capacity, efficiency, and physical fitness and two  
24 open questions: 1) draw backs because of donation and 2) desires addressed to SOL-  
25 DHR (what can SOL-DHR do better ?)  
26  
27  
28  
29  
30  
31  
32  
33  
34  
35

### 36 **Data monitoring and quality assurance**

37 All incoming data are checked by cohort staff for completeness and plausibility, and are  
38 entered thereafter into an electronic database. In case of lacking information, staff calls to the  
39 office of the family physician and tries to receive any missing data. All cases with an  
40 abnormality are discussed with the principle investigator once or twice a month. Urgent cases  
41 are discussed immediately and interventions are initiated without delay. All outcomes are  
42 stored within the database.  
43  
44  
45  
46  
47  
48  
49  
50  
51

52 The “principle of intervention” is a key feature of this cohort study. Thus, we do not only  
53 observe our cohort, but we also intervene actively, as soon as any potential danger is turning  
54 up. Interventions are planned to be provided by the family physician based on the  
55 recommendation of the study leaders. Recommendations may include performing a diagnostic  
56 procedure like the 24h blood-pressure measurement in order to confirm hypertension or to  
57  
58  
59  
60

1  
2  
3 perform a sonography of the remaining kidney or simply to repeat the chemical analysis. The  
4  
5 letter may contain a recommendation for treatment, i.e. a renoprotective antihypertensive drug  
6  
7 (ACEI or ARA), when blood pressure is high and already accompanied by micro-  
8  
9 albuminuria. We ask the colleague to select the specific agent among ACEI or ARA he is  
10  
11 most familiar with.  
12  
13  
14  
15  
16  
17

### 18 **Reimbursement**

19  
20  
21 Doctors' bill for this examination is sent to the study headquarter, which forwards this bill to  
22  
23 the health insurance of the kidney recipient. The amount which can be asked by the family  
24  
25 physician for this service is now fixed with the majority of Swiss health insurances at about  
26  
27 150 Swiss Francs (~115 Euros). The Sponsor Fund of this cohort study covers the  
28  
29 examination costs if a recipient dies. The basic concept is to charge the costs of kidney donor  
30  
31 follow-up to the insurance of the kidney recipient, because they would have to pay the  
32  
33 dialysis costs if no living donation had taken place. Coverage includes all costs including  
34  
35 those of late complications that are causally related to the donation.  
36  
37  
38  
39  
40  
41  
42

### 43 **Handling missing responses**

44  
45  
46 If within 2 months no response is received after invitation (neither a filled out questionnaire  
47  
48 from the donor nor the family physician or laboratory) SOL-DHR staff calls the donor. If the  
49  
50 donor declares, that he does not longer want to participate he or she will be marked "inactive"  
51  
52 in the cohort database and follow-up is suspended. If the donor, however, changes his or her  
53  
54 mind, and gets in touch with us again (i.e. after moving back to Switzerland) the status is  
55  
56 changed back to "active" immediately at any time.  
57  
58  
59  
60

### Statistical Considerations

Epidemiologic data and patients' descriptives available on continuous scales will be presented with medians, interquartile ranges or means and standard deviations as appropriate.

Categorical data will be presented as rates and percentages. Association of individual (independent) variables on the outcome variables will be reported using correlation coefficients. Results from univariate analysis will inform multivariate modelling. Assessment of causal associations will be performed using multivariate models including potential confounders along with the independent variables of interest. Prognostic scores will be built using either multivariate logistic regression analysis or Cox proportional hazard models.

Models will be validated in cross samples. Calibration and discrimination of the cross-validated prognostic instruments will be assessed using the Brier Score. Time-Series analysis will be performed using random effects regression models where appropriate.

## Discussion

This paper describes the rationale and set-up of a lifelong prospective cohort study of living kidney donors in Switzerland. This study offers unique opportunities assessing the frequency of occurrence of unfavourable outcomes following donation and allows determining risk factors associated to them. More specifically, we are particularly interested increasing our understanding of the long term effect of donation on renal function, the risk to develop hypertension or abuminuria and to explore whether adverse outcomes depend on the method of nephrectomy applied. Moreover, the systematic collection of all clinically relevant data and the monitoring of participants on a regular basis allow timely interventions if critical parameters of kidney function or general health change for the worse.

An overview of the existing evidence

In the eighties and early nineties many interesting papers were already available<sup>2-7 11-19</sup>. They all tried to quantify the morbidity and mortality of living kidney donation or unilateral nephrectomy. Most data derive from single centres in the USA, some from Norway or Australia. Unfortunately all published data were collected retrospectively and incompletely. The percent of missed donors ranges from 21%<sup>2 3</sup> to 31%<sup>4</sup>, to 42%<sup>5 6</sup> up to 77%<sup>7</sup>. Prospective long-term follow-up of living donors has not been regarded generally as a necessity.

Today, kidney donation is now generally accepted as a relatively safe procedure based on additional retrospectively collected long-term data that are still quite incomplete<sup>20-23</sup>. Several methods of endoscopic (including robotic assisted) nephrectomy have been introduced and have shown to be relatively safe<sup>24-34</sup>. Single centre reports are mainly defending their own used technology<sup>26 29-32</sup>. Bottom line however, countrywide prospective cohorts allowing a

1  
2  
3 comparison of various surgical procedures are yet unavailable or in an early phase comparing  
4  
5 no more than two methods <sup>28</sup>.  
6  
7

8 The question whether kidney donation increases the risk for hypertension, which was already  
9  
10 on debate in the eighties <sup>4 12 18</sup>, is still unsettled due to limited studies <sup>25</sup>. We think that the  
11  
12 results of this large national wide prospective cohort study will answer many still open  
13  
14 questions concerning living kidney donor outcome.  
15  
16  
17  
18  
19  
20  
21  
22  
23  
24  
25  
26  
27  
28  
29  
30  
31  
32  
33  
34  
35  
36  
37  
38  
39  
40  
41  
42  
43  
44  
45  
46  
47  
48  
49  
50  
51  
52  
53  
54  
55  
56  
57  
58  
59  
60

For peer review only

## References

1. Butz K. Organ transplantation from the lawyer's viewpoint. *Schw. Ärztezeitschrift* 1987;68:1826-1829.
2. Dunn JF, Nylander WA, Jr., Richie RE, Johnson HK, MacDonell RC, Jr., Sawyers JL. Living related kidney donors. A 14-year experience. *Ann Surg* 1986;203(6):637-43.
3. Westlie L, Fauchald P, Talseth T, Jakobsen A, Flatmark A. Quality of life in Norwegian kidney donors. *Nephrol Dial Transplant* 1993;8(10):1146-50.
4. Torres VE, Offord KP, Anderson CF, Velosa JA, Frohnert PP, Donadio JV, Jr., et al. Blood pressure determinants in living-related renal allograft donors and their recipients. *Kidney Int* 1987;31(6):1383-90.
5. Najarian JS, Chavers BM, McHugh LE, Matas AJ. 20 years or more of follow-up of living kidney donors. *Lancet* 1992;340(8823):807-10.
6. Smith MD, Kappell DF, Province MA, Hong BA, Robson AM, Dutton S, et al. Living-related kidney donors: a multicenter study of donor education, socioeconomic adjustment, and rehabilitation. *Am J Kidney Dis* 1986;8(4):223-33.
7. Miller IJ, Suthanthiran M, Riggio RR, Williams JJ, Riehle RA, Vaughan ED, et al. Impact of renal donation. Long-term clinical and biochemical follow-up of living donors in a single center. *Am J Med* 1985;79(2):201-8.
8. Levey AS, Eckardt KU, Tsukamoto Y, Levin A, Coresh J, Rossert J, et al. Definition and classification of chronic kidney disease: a position statement from Kidney Disease: Improving Global Outcomes (KDIGO). *Kidney Int* 2005;67(6):2089-100.
9. Levey AS, Coresh J, Greene T, Marsh J, Stevens LA, Kusek JW, et al. Expressing the Modification of Diet in Renal Disease Study equation for estimating glomerular filtration rate with standardized serum creatinine values. *Clin Chem* 2007;53(4):766-72.
10. Dindo D, Demartines N, Clavien PA. Classification of surgical complications: a new proposal with evaluation in a cohort of 6336 patients and results of a survey. *Ann Surg* 2004;240(2):205-13.
11. Bay WH, Hebert LA. The living donor in kidney transplantation. *Ann Intern Med* 1987;106(5):719-27.
12. Hakim RM, Goldszer RC, Brenner BM. Hypertension and proteinuria: long-term sequelae of uninephrectomy in humans. *Kidney Int* 1984;25(6):930-6.
13. Levey AS, Hou S, Bush HL, Jr. Kidney transplantation from unrelated living donors. Time to reclaim a discarded opportunity. *N Engl J Med* 1986;314(14):914-6.
14. Morris P, St George B, Waring T, Nanra R. Psychosocial complications in living related kidney donors: an Australian experience. *Transplant Proc* 1987;19(2):2840-4.
15. Narkun-Burgess DM, Nolan CR, Norman JE, Page WF, Miller PL, Meyer TW. Forty-five year follow-up after uninephrectomy. *Kidney Int* 1993;43(5):1110-5.
16. Penn I, Halgrimson CG, Ogden D, Starzl TE. Use of living donors in kidney transplantation in man. *Arch Surg* 1970;101(2):226-31.
17. Spital A. Living kidney donation: still worth the risk. *Transplant Proc* 1988;20(5):1051-8.

18. Talseth T, Fauchald P, Skrede S, Djosealand O, Berg KJ, Stenstrom J, et al. Long-term blood pressure and renal function in kidney donors. *Kidney Int* 1986;29(5):1072-6.
19. Weiland D, Sutherland ER, Chavers BM, Simmons L, Ascher NL, Najarian JS. Information of 628 Living-related Kidney donors at a single institution, with long-term follow-up in 472 cases. *Transplant Proc* 1984;16:5-7.
20. Clemens K, Boudville N, Dew MA, Geddes C, Gill JS, Jassal V, et al. The Long-Term Quality of Life of Living Kidney Donors: A Multicenter Cohort Study. *Am J Transplant*;11(3):463-469.
21. Fehrman-Ekholm I, Elinder CG, Stenbeck M, Tyden G, Groth CG. Kidney donors live longer. *Transplantation* 1997;64(7):976-8.
22. Ibrahim HN, Foley R, Tan L, Rogers T, Bailey RF, Guo H, et al. Long-term consequences of kidney donation. *N Engl J Med* 2009;360(5):459-69.
23. Tan JC, Chertow GM. Cautious optimism concerning long-term safety of kidney donation. *N Engl J Med* 2009;360(5):522-3.
24. Bachmann A, Wolff T, Ruzsat R, Giannini O, Dickenmann M, Gurke L, et al. Retroperitoneoscopic donor nephrectomy: a retrospective, non-randomized comparison of early complications, donor and recipient outcome with the standard open approach. *Eur Urol* 2005;48(1):90-6; discussion 96.
25. Boudville N, Prasad GV, Knoll G, Muirhead N, Thiessen-Philbrook H, Yang RC, et al. Meta-analysis: risk for hypertension in living kidney donors. *Ann Intern Med* 2006;145(3):185-96.
26. Capolicchio JP, Saemi A, Trotter S, Plante MK. Retroperitoneoscopic Nephrectomy With a Modified Hand-assisted Approach. *Urology*;77(3):607-11.
27. Dols LF, Kok NF, Ijzermans JN. Live donor nephrectomy: a review of evidence for surgical techniques. *Transpl Int*;23(2):121-30.
28. Dols LF, Kok NF, Terkivatan T, Tran TC, d'Ancona FC, Langenhuijsen JF, et al. Hand-assisted retroperitoneoscopic versus standard laparoscopic donor nephrectomy: HARP-trial. *BMC Surg*;10:11.
29. Hoda MR, Greco F, Wagner S, Heynemann H, Fornara P. Prospective, nonrandomized comparison between right- and left-sided hand-assisted laparoscopic donor nephrectomy. *Transplant Proc*;43(1):353-6.
30. Jacobs SC, Cho E, Dunkin BJ, Bartlett ST, Flowers JL, Jarrell B. Laparoscopic nephrectomy in the markedly obese living renal donor. *Urology* 2000;56(6):926-9.
31. Kohei N, Kazuya O, Hirai T, Miyauchi Y, Iida S, Shirakawa H, et al. Retroperitoneoscopic living donor nephrectomy: experience of 425 cases at a single center. *J Endourol*;24(11):1783-7.
32. Ma L, Ye J, Huang Y, Hou X, Zhao L, Wang G. Retroperitoneoscopic live-donor nephrectomy: 5-year single-center experience in China. *Int J Urol*;17(2):158-62.
33. Troppmann C, Daily MF, McVicar JP, Troppmann KM, Perez RV. The transition from laparoscopic to retroperitoneoscopic live donor nephrectomy: a matched pair pilot study. *Transplantation*;89(7):858-63.
34. Wadstrom J, Biglarnia A, Gjertsen H, Sugitani A, Fronek J. Introducing hand-assisted retroperitoneoscopic live donor nephrectomy: learning curves and development based on 413 consecutive cases in four centers. *Transplantation*;91(4):462-9.



### Competing interests

The authors declare that they have no competing interests.

### Authors' contributions

All authors participated in study design; GT drafted the protocol. All the authors read and approved the final manuscript.

### Acknowledgments

We are indebted to the medical / surgical team and the transplant coordinators of the Transplant Centres of Basel, Bern, Geneva, Lausanne, St. Gallen and Zürich. We would like to thank Ruth Lützelschwab and Christina Wolf-Heidegger for secretarial help. Also, we are grateful to Thomas Voegele (Transplant coordinator) for his initial participation, when SOL-DHR was started (1993) and to Hanspeter Hort (graphic artist) for designing the SOL-DHR logo for free. We thank Guy Kollwelter and Heinz Herrmann (both from Astellas) for providing us with medals and individual diplomas for living donors.

This study receives funding from various sponsors (see below). The funding bodies had no role in study design, in the collection, analysis and interpretation of data in the writing of the manuscripts and in the decision to submit the manuscript for publication.

### Main Sponsors:

Viollier AG, Novartis Pharma Schweiz AG, Alfred and Erika Baer-Spycher-Stiftung, Astellas Pharma AG, Fresenius Medical care (Switzerland) AG, Roche Pharma (Switzerland) AG

### Regular Sponsors:

AMGEN (Switzerland) AG, Fresenius Biotech GmbH, Wyeth Pharmaceuticals AG, Spirig Pharma AG, diverse private Sponsors

**Other Sponsors:**

Schweizerische Gesellschaft für Nephrologie SGN, Bundesamt für Gesundheit, HP Hort,  
Pfizer AG, Sanofi-Aventis (Switzerland) AG, Genzyme GmbH, H.U. Böhi, P. Roth Yin Yee,  
Oliver Boidol, B. Braun Medical AG, Schweizer Nierenliga, Gambro Hospal (Switzerland)  
AG, Baxter AG.

For peer review only

STROBE Statement—Checklist of items that should be included in reports of *cohort studies*

|                              | Item No | Recommendation                                                                                                                                                                                                                                                                                                                                                                                                |
|------------------------------|---------|---------------------------------------------------------------------------------------------------------------------------------------------------------------------------------------------------------------------------------------------------------------------------------------------------------------------------------------------------------------------------------------------------------------|
| <b>Title and abstract</b>    | 1       | (a) Indicate the study's design with a commonly used term in the title or the abstract<br>(b) Provide in the abstract an informative and balanced summary of what was done and what was found                                                                                                                                                                                                                 |
| <b>Introduction</b>          |         |                                                                                                                                                                                                                                                                                                                                                                                                               |
| Background/rationale         | 2       | Explain the scientific background and rationale for the investigation being reported                                                                                                                                                                                                                                                                                                                          |
| Objectives                   | 3       | State specific objectives, including any prespecified hypotheses                                                                                                                                                                                                                                                                                                                                              |
| <b>Methods</b>               |         |                                                                                                                                                                                                                                                                                                                                                                                                               |
| Study design                 | 4       | Present key elements of study design early in the paper                                                                                                                                                                                                                                                                                                                                                       |
| Setting                      | 5       | Describe the setting, locations, and relevant dates, including periods of recruitment, exposure, follow-up, and data collection                                                                                                                                                                                                                                                                               |
| Participants                 | 6       | (a) Give the eligibility criteria, and the sources and methods of selection of participants. Describe methods of follow-up<br>(b) For matched studies, give matching criteria and number of exposed and unexposed                                                                                                                                                                                             |
| Variables                    | 7       | Clearly define all outcomes, exposures, predictors, potential confounders, and effect modifiers. Give diagnostic criteria, if applicable                                                                                                                                                                                                                                                                      |
| Data sources/<br>measurement | 8*      | For each variable of interest, give sources of data and details of methods of assessment (measurement). Describe comparability of assessment methods if there is more than one group                                                                                                                                                                                                                          |
| Bias                         | 9       | Describe any efforts to address potential sources of bias                                                                                                                                                                                                                                                                                                                                                     |
| Study size                   | 10      | Explain how the study size was arrived at                                                                                                                                                                                                                                                                                                                                                                     |
| Quantitative variables       | 11      | Explain how quantitative variables were handled in the analyses. If applicable, describe which groupings were chosen and why                                                                                                                                                                                                                                                                                  |
| Statistical methods          | 12      | (a) Describe all statistical methods, including those used to control for confounding<br>(b) Describe any methods used to examine subgroups and interactions<br>(c) Explain how missing data were addressed<br>(d) If applicable, explain how loss to follow-up was addressed<br>(e) Describe any sensitivity analyses                                                                                        |
| <b>Results</b>               |         |                                                                                                                                                                                                                                                                                                                                                                                                               |
| Participants                 | 13*     | (a) Report numbers of individuals at each stage of study—eg numbers potentially eligible, examined for eligibility, confirmed eligible, included in the study, completing follow-up, and analysed<br>(b) Give reasons for non-participation at each stage<br>(c) Consider use of a flow diagram                                                                                                               |
| Descriptive data             | 14*     | (a) Give characteristics of study participants (eg demographic, clinical, social) and information on exposures and potential confounders<br>(b) Indicate number of participants with missing data for each variable of interest<br>(c) Summarise follow-up time (eg, average and total amount)                                                                                                                |
| Outcome data                 | 15*     | Report numbers of outcome events or summary measures over time                                                                                                                                                                                                                                                                                                                                                |
| Main results                 | 16      | (a) Give unadjusted estimates and, if applicable, confounder-adjusted estimates and their precision (eg, 95% confidence interval). Make clear which confounders were adjusted for and why they were included<br>(b) Report category boundaries when continuous variables were categorized<br>(c) If relevant, consider translating estimates of relative risk into absolute risk for a meaningful time period |

|    |                          |    |                                                                                                                                                                            |
|----|--------------------------|----|----------------------------------------------------------------------------------------------------------------------------------------------------------------------------|
| 1  | Other analyses           | 17 | Report other analyses done—eg analyses of subgroups and interactions, and sensitivity analyses                                                                             |
| 2  |                          |    |                                                                                                                                                                            |
| 3  |                          |    |                                                                                                                                                                            |
| 4  | <b>Discussion</b>        |    |                                                                                                                                                                            |
| 5  | Key results              | 18 | Summarise key results with reference to study objectives                                                                                                                   |
| 6  |                          |    |                                                                                                                                                                            |
| 7  | Limitations              | 19 | Discuss limitations of the study, taking into account sources of potential bias or imprecision. Discuss both direction and magnitude of any potential bias                 |
| 8  |                          |    |                                                                                                                                                                            |
| 9  | Interpretation           | 20 | Give a cautious overall interpretation of results considering objectives, limitations, multiplicity of analyses, results from similar studies, and other relevant evidence |
| 10 |                          |    |                                                                                                                                                                            |
| 11 | Generalisability         | 21 | Discuss the generalisability (external validity) of the study results                                                                                                      |
| 12 |                          |    |                                                                                                                                                                            |
| 13 | <b>Other information</b> |    |                                                                                                                                                                            |
| 14 |                          |    |                                                                                                                                                                            |
| 15 | Funding                  | 22 | Give the source of funding and the role of the funders for the present study and, if applicable, for the original study on which the present article is based              |
| 16 |                          |    |                                                                                                                                                                            |
| 17 |                          |    |                                                                                                                                                                            |

18  
19 \*Give information separately for exposed and unexposed groups.

20  
21 **Note:** An Explanation and Elaboration article discusses each checklist item and gives methodological background and published examples of transparent reporting. The STROBE checklist is best used in conjunction with this article (freely available on the Web sites of PLoS Medicine at <http://www.plosmedicine.org/>, Annals of Internal Medicine at <http://www.annals.org/>, and Epidemiology at <http://www.epidem.com/>). Information on the STROBE Initiative is available at <http://www.strobe-statement.org>.

22  
23  
24  
25  
26  
27  
28  
29  
30  
31  
32  
33  
34  
35  
36  
37  
38  
39  
40  
41  
42  
43  
44  
45  
46  
47  
48  
49  
50  
51  
52  
53  
54  
55  
56  
57  
58  
59  
60

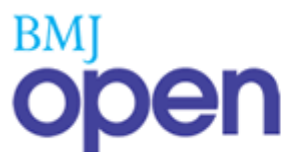

**Prospective Swiss cohort study of living-kidney donors -  
Study protocol**

|                                 |                                                                                                                                                                                                                                                                                                                                                                                         |
|---------------------------------|-----------------------------------------------------------------------------------------------------------------------------------------------------------------------------------------------------------------------------------------------------------------------------------------------------------------------------------------------------------------------------------------|
| Journal:                        | <i>BMJ Open</i>                                                                                                                                                                                                                                                                                                                                                                         |
| Manuscript ID:                  | bmjopen-2011-000202.R1                                                                                                                                                                                                                                                                                                                                                                  |
| Article Type:                   | Protocol                                                                                                                                                                                                                                                                                                                                                                                |
| Date Submitted by the Author:   | 12-Jul-2011                                                                                                                                                                                                                                                                                                                                                                             |
| Complete List of Authors:       | Thiel, Gil; University Hospital of Basel, SOL-DHR auf der Klinik Abteilung Transplantationsimmunologie und Nephrologie<br>Nolte, Christa; University Hospital of Basel, SOL-DHR auf der Klinik Abteilung Transplantationsimmunologie und Nephrologie<br>Tsinalis, Dimitrios; University Hospital of Basel, SOL-DHR auf der Klinik Abteilung Transplantationsimmunologie und Nephrologie |
| <b>Primary Subject Heading</b>: | Renal medicine                                                                                                                                                                                                                                                                                                                                                                          |
| Keywords:                       | Renal transplantation < NEPHROLOGY, Transplant surgery < SURGERY, EPIDEMIOLOGY                                                                                                                                                                                                                                                                                                          |
|                                 |                                                                                                                                                                                                                                                                                                                                                                                         |

SCHOLARONE™  
Manuscripts

only

1 STROBE Statement—Checklist of items that should be included in reports of *cohort studies*

|                              | Item No | Recommendation                                                                                                                                                                                                                                                                                                                                                                                                |
|------------------------------|---------|---------------------------------------------------------------------------------------------------------------------------------------------------------------------------------------------------------------------------------------------------------------------------------------------------------------------------------------------------------------------------------------------------------------|
| <b>Title and abstract</b>    | 1       | (a) Indicate the study's design with a commonly used term in the title or the abstract<br>(b) Provide in the abstract an informative and balanced summary of what was done and what was found                                                                                                                                                                                                                 |
| <b>Introduction</b>          |         |                                                                                                                                                                                                                                                                                                                                                                                                               |
| Background/rationale         | 2       | Explain the scientific background and rationale for the investigation being reported                                                                                                                                                                                                                                                                                                                          |
| Objectives                   | 3       | State specific objectives, including any prespecified hypotheses                                                                                                                                                                                                                                                                                                                                              |
| <b>Methods</b>               |         |                                                                                                                                                                                                                                                                                                                                                                                                               |
| Study design                 | 4       | Present key elements of study design early in the paper                                                                                                                                                                                                                                                                                                                                                       |
| Setting                      | 5       | Describe the setting, locations, and relevant dates, including periods of recruitment, exposure, follow-up, and data collection                                                                                                                                                                                                                                                                               |
| Participants                 | 6       | (a) Give the eligibility criteria, and the sources and methods of selection of participants. Describe methods of follow-up<br>(b) For matched studies, give matching criteria and number of exposed and unexposed                                                                                                                                                                                             |
| Variables                    | 7       | Clearly define all outcomes, exposures, predictors, potential confounders, and effect modifiers. Give diagnostic criteria, if applicable                                                                                                                                                                                                                                                                      |
| Data sources/<br>measurement | 8*      | For each variable of interest, give sources of data and details of methods of assessment (measurement). Describe comparability of assessment methods if there is more than one group                                                                                                                                                                                                                          |
| Bias                         | 9       | Describe any efforts to address potential sources of bias                                                                                                                                                                                                                                                                                                                                                     |
| Study size                   | 10      | Explain how the study size was arrived at                                                                                                                                                                                                                                                                                                                                                                     |
| Quantitative variables       | 11      | Explain how quantitative variables were handled in the analyses. If applicable, describe which groupings were chosen and why                                                                                                                                                                                                                                                                                  |
| Statistical methods          | 12      | (a) Describe all statistical methods, including those used to control for confounding<br>(b) Describe any methods used to examine subgroups and interactions<br>(c) Explain how missing data were addressed<br>(d) If applicable, explain how loss to follow-up was addressed<br>(e) Describe any sensitivity analyses                                                                                        |
| <b>Results</b>               |         |                                                                                                                                                                                                                                                                                                                                                                                                               |
| Participants                 | 13*     | (a) Report numbers of individuals at each stage of study—eg numbers potentially eligible, examined for eligibility, confirmed eligible, included in the study, completing follow-up, and analysed<br>(b) Give reasons for non-participation at each stage<br>(c) Consider use of a flow diagram                                                                                                               |
| Descriptive data             | 14*     | (a) Give characteristics of study participants (eg demographic, clinical, social) and information on exposures and potential confounders<br>(b) Indicate number of participants with missing data for each variable of interest<br>(c) Summarise follow-up time (eg, average and total amount)                                                                                                                |
| Outcome data                 | 15*     | Report numbers of outcome events or summary measures over time                                                                                                                                                                                                                                                                                                                                                |
| Main results                 | 16      | (a) Give unadjusted estimates and, if applicable, confounder-adjusted estimates and their precision (eg, 95% confidence interval). Make clear which confounders were adjusted for and why they were included<br>(b) Report category boundaries when continuous variables were categorized<br>(c) If relevant, consider translating estimates of relative risk into absolute risk for a meaningful time period |

|                          |    |                                                                                                                                                                            |
|--------------------------|----|----------------------------------------------------------------------------------------------------------------------------------------------------------------------------|
| Other analyses           | 17 | Report other analyses done—eg analyses of subgroups and interactions, and sensitivity analyses                                                                             |
| <b>Discussion</b>        |    |                                                                                                                                                                            |
| Key results              | 18 | Summarise key results with reference to study objectives                                                                                                                   |
| Limitations              | 19 | Discuss limitations of the study, taking into account sources of potential bias or imprecision. Discuss both direction and magnitude of any potential bias                 |
| Interpretation           | 20 | Give a cautious overall interpretation of results considering objectives, limitations, multiplicity of analyses, results from similar studies, and other relevant evidence |
| Generalisability         | 21 | Discuss the generalisability (external validity) of the study results                                                                                                      |
| <b>Other information</b> |    |                                                                                                                                                                            |
| Funding                  | 22 | Give the source of funding and the role of the funders for the present study and, if applicable, for the original study on which the present article is based              |

\*Give information separately for exposed and unexposed groups.

**Note:** An Explanation and Elaboration article discusses each checklist item and gives methodological background and published examples of transparent reporting. The STROBE checklist is best used in conjunction with this article (freely available on the Web sites of PLoS Medicine at <http://www.plosmedicine.org/>, Annals of Internal Medicine at <http://www.annals.org/>, and Epidemiology at <http://www.epidem.com/>). Information on the STROBE Initiative is available at <http://www.strobe-statement.org>.

## Prospective Swiss cohort study of living-kidney donors - Study protocol

Gilbert T. Thiel<sup>1</sup> \*, Christa Nolte<sup>1</sup>, Dimitrios Tsinalis<sup>2</sup>

[1]

SOL-DHR (Swiss Organ Living Donor Health Registry)

At the Division of Transplant Immunology and Nephrology in the  
University Hospital of Basel, Switzerland

[2]

SOL-DHR (Division of Nephrology),  
Kantonsspital St. Gallen, Switzerland)

### \* Corresponding Author

Professor Gilbert T. Thiel, University Hospital of Basel, SOL-DHR auf der Klinik Abteilung  
Transplantationsimmunologie und Nephrologie, Petersgraben 4, Basel, 4056 Switzerland

### e-mail Addresses:

Gilbert T. Thiel: [gil.thiel@unibas.ch](mailto:gil.thiel@unibas.ch)

Christa Nolte: [cnolte@uhbs.ch](mailto:cnolte@uhbs.ch)

Dimitrios Tsinalis: [dimitrios.tsinalis@kssg.ch](mailto:dimitrios.tsinalis@kssg.ch)



## ABSTRACT

*Background* Offering living kidney donation raised the concern that donors are exposed to unknown risks. All Swiss transplant centres therefore decided to start a prospective cohort study of living kidney donors in Switzerland. This paper describes the rationale and set-up of this cohort.

*Methods/Design* All kidney donors in Switzerland are registered and examined before donation and biennially after donation starting in the first year after nephrectomy. In the lead-up of a follow-up visit, the study centre sends a little parcel to the kidney donor containing the health questionnaire, blood and urine tubes and a pre-paid envelope for sending the samples to the central laboratory. The donor makes an appointment with his family physician, who examines the donor and reports findings such as pain and other complains, blood pressure, creatinine, albumin and all major health events and the state of mental and social wellbeing to the study centre. All data are centrally managed. All abnormal findings in the follow-up of individual donors are regularly discussed with the principle investigator and all necessary measures are taken. Any intervention is stored in the database. The health-insurance of the organ-recipient covers all costs of the donor-follow-up. Main outcomes are the occurrence of albuminuria, hypertension and renal insufficiency. Secondary outcomes are major somatic and social events such as death, cardiovascular disease, stroke and depression.

*Discussion* This prospective cohort offers unique opportunities assessing the risks of living kidney donation and allows examining risk differences for all available methods used for nephrectomy in Switzerland (various forms of open surgery and endoscopic nephrectomy). Moreover, the prospective collection of all clinically relevant data and the monitoring of participants on a regular basis allow timely interventions at an early stage before critical parameters of kidney function or general health problems occur.

## BACKGROUND

Living kidney donors were used in Switzerland since 1967 but at a low rate. This, however, changed in the early nineties. Rapid expansion of live kidney transplantation took place especially in one large Swiss transplant centre, where live kidney was formerly strictly disapproved over two decades because of ethical reasons. But the rising number of live donor transplantation was not well accepted from all sides. A lawyer wrote in the Swiss Medical Journal that “organ removal from a living person for transplantation is an intended bodily injury according to civil and criminal law”<sup>1</sup>. Concerns were raised over the safety of live organ donation for the donors. The available published data from retrospective studies were largely incomplete. In these studies the percent of donors without follow up data ranged from 21%<sup>2,3</sup> to 31%<sup>4</sup>, to 42%<sup>5,6</sup> up to 77%<sup>7</sup>. Given the available evidence, any fair counselling of potential living donors seems difficult.

Since living donor transplantation was mainly propagated by the Basel transplant centre, we felt obliged to offer a long-time follow-up of the health state of living organ donors for all Swiss transplant centres. This idea was well accepted by the other five Swiss centres (Bern, Geneva, Lausanne, St. Gallen and Zürich) and consequently, the cohort study by the name of SOL-DHR (Swiss Organ Living Donor Health Registry) was initiated in April 1993.

This paper describes the rationale and set-up of this prospective cohort study aiming at assessing the prevalence of complications of living kidney donation and aiming at identifying risk profiles associated with unfavourable outcomes. In particular the study is designed to prospectively quantify the risks to donors after living kidney donation such as the development of hypertension, albuminuria, renal failure and psychological diseases and to assist in the management of individual donors at an early stage if such complications occur.

## METHODS / DESIGN

Prospective cohort study: There was an a priori consensus among the founding members that health state of all consenting eligible living kidney donors should be assessed life-long at regular time intervals in the context of a prospective cohort study. The protocol and the questionnaires were approved by the Ethical Committee of the University Hospital of Basel and the Swiss Academy of Medical Science (SAMW). No informed consent is required as lifelong follow-up of living donor's health state is required by the Swiss Transplant Law and as long as data are analysed anonymously. However, to assure compliance to the long term follow up protocol, donors are informed about the aims of the protocol and the registry before their donation. In addition, kidney donors have at any time after donation the option to quit their participation by simply ignoring the invitation from SOL-DHR to visit their family physician.

Donors from all six kidney transplant centres are included in the SOL-DHR. Until the end of 2010 a total of 1332 living kidney donors have been included (Basel n=521, Berne n=119, Geneva n=111, Lausanne n=151, St. Gallen n=79 and Zurich n=360).

### Main objectives

- Gaining prospective outcome data from living kidney donors in Switzerland
- Assess and quantify the risks for early and late complications due to organ removal
- Improve the information given to potential donors before agreeing to donate a kidney
- Install a system of timely intervention in case of deterioration in state of health
- Compare the consequences of different methods of organ removal on state of health
- Provide a neutral platform, where donors can express complains and receive help

## Data collection principles

Study inclusion and a first medical examination before kidney donation is done by the transplant centre (see basic medical questionnaire below). A second questionnaire (early complication questionnaire) is collected from the transplant centre at the time of discharge after nephrectomy. Thereafter the SOL-DHR centre organises a lifelong follow-up after nephrectomy at 1 year, 3 years, 5 years, 7 years, 10 years and biennially thereafter. The kidney donors are examined by their family physicians in the vicinity where they live. In the lead-up of a follow-up visit, the SOL-DHR centre sends a little parcel to the kidney donor asking the donor to make an appointment with the present family physician of his choice. The parcel contains the brief information for the donor and the family physician, a health questionnaire, tubes for blood and urine samples and a pre-paid envelope for sending the samples at room temperature to the central laboratory (Viollier AG Basel). The basic biennial follow up questionnaire is filled in by the family physician. Every five years the donor fills in the additional SF8 and social status questionnaire (see below).

If no response from the donor is received within 2 months, SOL-DHR initiates a search for the donor and attempts collecting possible data on donor death and its reason by contacting the recipient, the donor's health insurance and the public registries.

Results from the blood and urine analysis by the central laboratory are sent to the family physician and to the cohort manager.

## Participation of family physicians

Whereas kidney recipients live usually in the area of the transplant centre, kidney donors often do not. Asking donors to travel lifelong biennially to the distant transplant centre for

1  
2  
3 control has little chance to be followed, particularly since travel expenses are not covered.  
4  
5 Follow-up controls done by the family physician working in the vicinity of the donor improve  
6  
7 donor's willingness to participate manifold. Family physicians as well as young medical  
8  
9 assistants at the transplant centre follow the protocols provided by the study centre.  
10  
11  
12  
13  
14  
15

## 16 **Collected data**

### 17 *Laboratory data*

18  
19 We quantify creatinine in blood and urine, albumin and protein in urine. The method used to  
20  
21 quantify creatinine in blood changed over the years: 1993 -1996 Jaffee, 1997 -2003  
22  
23 enzymatic assay (Roche), 2004 – 2005 “Jaffe compensated” (Roche), 2006 – 2007 “Jaffe  
24  
25 corrected” (Siemens). Since September 2007 enzymatic assay (Siemens). In order to avoid  
26  
27 systematic errors due to different assays prior to the data base entry all values are converted to  
28  
29 values traceable to isotope dilution mass spectrometry (IDMS) as recommended by the  
30  
31 KDIGO consensus conference<sup>8</sup> using calibration data supplied by the assay's manufacturers  
32  
33 (data available on request). Albumin in urine is measured by turbidimetry after antigen-  
34  
35 antibody reaction using the endpoint method (Roche Diagnostics).  
36  
37  
38  
39  
40  
41  
42

43 Whenever during a follow-up a laboratory results (creatinine or albumin/creatinine ratio)  
44  
45 exceeds the expected range in an individual donor, the sampling and the laboratory analysis is  
46  
47 repeated.  
48  
49  
50  
51  
52  
53

## 54 **Definitions**

### 55 *Estimation of the glomerular filtration rate (GFR)*

56  
57 To estimate GFR, we use the MDRD equation for IDMS-traceable creatinine values<sup>9</sup>  
58  
59  
60

1  
2  
3 eGFR (mL/min/1.73 m<sup>2</sup>) =

4  
5  $175 \times (\text{Scr}/88.4)^{-1.154} \times (\text{Age})^{-0.203} \times (0.742^*) \times (1.212^+)$  \* If female + If African  
6  
7  
8  
9

10  
11 *Micro-albuminuria (= high albumin excretion)*  
12

13  
14 We assume a daily urinary excretion of 10 mmol Creatinin/24h as being normal for donors  
15  
16 (mean value for both genders taken together, - underestimating it for males, overestimating  
17  
18 for females). Data on albuminuria will be presented based on cut-off points defined by the  
19  
20 report of the scientific workshop sponsored by the National Kidney Foundation and the US  
21  
22 Food and Drug Administration.<sup>10</sup> The cut-off-point for albumin excretion to be called micro-  
23  
24 albuminuria or high albumin excretion is set to > 30 mg albumine / g creatinine corresponding  
25  
26 to  $\geq 3.3$  mg albumin / mmol creatinine. For clarity reasons we will use the term micro-  
27  
28 albuminuria which is commonly used in Europe rather than the term “high albumin excretion”  
29  
30 used in North America. For the definition of macro-albuminuria or very high albumine  
31  
32 excretion at cut-off point of >300 mg albumin / g creatinine corresponding to 33.9 mg  
33  
34 albumin / mmol creatinine is used.  
35  
36  
37  
38  
39  
40  
41  
42

43 *Hypertension*  
44

45  
46 Donors having a systolic pressure above 140 mm Hg or diastolic above 90 mmHg or both or  
47  
48 taking any antihypertensive drug are classified as hypertensive. In any case of new onset  
49  
50 hypertension, we ask the family physician to perform a 24h pressure recording. If  
51  
52 hypertension is confirmed, we recommend antihypertensive treatment with ACEI or an  
53  
54 Angiotensin receptor antagonist (ARA).  
55  
56  
57  
58  
59  
60

**Health state data**

1  
2  
3 At each visit, the family physician is asked to measure the actual weight, height and blood  
4 pressure (3 times in sitting position). Moreover he is requested to examine the bare abdomen  
5 of the donor in an upright posture in order to look for an incisional hernia or abdominal wall  
6 bulging caused by the nephrectomy. When the donor is complaining about pain at any specific  
7 place (i.e. lumbar back pain), it should be examined and evaluated, whether it is or could be  
8 causally related to nephrectomy. New complains, disease or any problems (somatic, mental,  
9 social) need to be mentioned carefully in a separate line of the form.  
10  
11  
12  
13  
14  
15  
16  
17  
18  
19  
20  
21  
22

### 23 *Questionnaires*

- 24  
25  
26 - The basic medical questionnaire to be collected before donation:

27  
28 The basic medical questionnaire collects information on body weight, sitting blood  
29 pressure (3 times), description of the nephrectomy scare, pain or new problems since  
30 the last examination and an inventory of all drugs currently taken. The questionnaire  
31 before donation also includes “major disease and back pain”, since we realize that  
32 back pain is such a common complaint that we need information before donation in  
33 order classify back pain after donation in a meaningful way.  
34  
35  
36  
37  
38  
39  
40  
41  
42

- 43 - Early complication questionnaire to be collected at the time of hospital discharge after  
44 nephrectomy (since 1998):

45  
46 This questionnaire is collecting data on the side and method used for nephrectomy and  
47 all complications occurring peri- and postoperatively including blood-transfusions,  
48 whether the endoscopic procedure had to be changed intraoperatively and whether  
49 surgical revision was necessary. Early postoperative pain, which reflects pain at the  
50 site of incision and sometimes in case of endoscopic nephrectomy additional shoulder  
51 pain do to body positioning during surgery, is assessed using the visual analogue  
52 scale. The questionnaire is filled out usually 2 weeks after nephrectomy. For grading  
53  
54  
55  
56  
57  
58  
59  
60

1  
2  
3 early complications we use the Clavien-Scale <sup>11</sup>. Every early complication observed in  
4 a donor is classified along the Clavien scale (Grade 1 =1, grade II=2, grade IIIa =3,  
5 grade IIIb=3.5, grade IVa=4, grade IVb=4.5 etc.). If multiple complications occur in  
6 the same donor, the single Clavien scores are added to what is called the Clavien-Sum  
7 per donor score as compared to the simple sum of observed complications per donor  
8 score. The two sums have different interpretations. For a given (sub) population of  
9 donors, i.e. older than 60 years, the “mean sum of complications” shows the frequency  
10 of early complications seen in elderly donors, the mean Clavien sum” however, their  
11 severity.

12  
13  
14  
15  
16  
17  
18  
19  
20  
21  
22  
23  
24  
25 - The basic biennial follow up questionnaire

26 The family physician is requested to measure body weight, sitting blood pressure (3  
27 times), examine the nephrectomy scare and to ask the donor all questions necessary to  
28 file-out the medical questionnaire including questions about pain and all serious health  
29 problems including major events such as stroke, cardiovascular events, diabetes or  
30 malignancies since the last examination. Back-pain is considered as nephrectomy  
31 related only if specified by the donor or his physician as being clearly more intensive  
32 than before donation as pain related to nephrectomy can be caused by instability of the  
33 abdominal wall after large lumbar incision with partial muscular palsy. Furthermore  
34 the family physician is asked to note all drugs currently taken; make a dip-stick  
35 examination of the urine and finally fill a blood and a urine tube and send both tubes  
36 to the central laboratory. If the urinary dip stick turns out to be positive for blood,  
37 protein, white blood cells and other abnormalities, the doctor has to make an  
38 additional microscopic examination of the urinary sediment. All clinical data,  
39 including the health state questionnaire, are sent to the study centre SOL-DHR.  
40  
41  
42  
43  
44  
45  
46  
47  
48  
49  
50  
51  
52  
53  
54  
55  
56  
57  
58  
59  
60



- 1  
2  
3 - SF-8 questionnaire to be collected every 5 years after donation (since 2002).  
4

5 The validated SF-8 multiple choice questionnaire was used to calculate the Physical  
6 Component Summary (PCS) and the Mental Component Summary (MCS).  
7

8 The questionnaire was supplemented by the three following multiple choice questions:  
9

10 1) In comparison to the last year how would you describe your actual health? 2) How  
11 has your emotional relation to the kidney recipient changed since donation? 3) Would  
12 you donate a kidney again, if you still had two kidneys?. The answers to these  
13 questions are analysed separately from the 8 SF-8 questions.  
14

- 15  
16  
17  
18  
19  
20  
21  
22  
23 - Social status questionnaire (since 2002).  
24

25 This instrument has been developed by SOL-DHR and contains multiple choice  
26 questions about the actual professional activity, working capacity, efficiency, and  
27 physical fitness and two open questions: 1) draw backs because of donation (e.g.  
28 financial, insurance, pension fund or professional disadvantages) and 2) donor's  
29 suggestion on possible improvement for the SOL-DHR activity (What can SOL-DHR  
30 do better for you?)  
31  
32  
33  
34  
35  
36  
37  
38  
39  
40  
41  
42

### 43 **Data monitoring and quality assurance**

44 All incoming data are checked by cohort staff for completeness and plausibility, and are  
45 entered thereafter into an electronic database. In case of lacking information, staff calls to the  
46 office of the family physician and tries to receive any missing data. All cases with an  
47 abnormality are discussed with the principle investigator once or twice a month. Urgent cases  
48 are discussed immediately and interventions are initiated without delay. All outcomes are  
49 stored within the database.  
50  
51  
52  
53  
54  
55  
56  
57  
58  
59  
60

The “principle of intervention” is a key feature of this cohort study. Thus, we do not only  
observe our cohort, but we also intervene actively, as soon as any potential danger is turning

1  
2  
3 up. Interventions are planned to be provided by the family physician based on the  
4  
5 recommendation of the study leaders. Recommendations may include performing a diagnostic  
6  
7 procedure like the 24h blood-pressure measurement in order to confirm hypertension or to  
8  
9 perform a sonography of the remaining kidney or simply to repeat the chemical analysis. The  
10  
11 letter may also contain a recommendation for treatment.  
12  
13  
14  
15  
16  
17

### 18 **Funding of SOL-DHR and Reimbursement for follow-up examinations**

19  
20 The SOL-DHR expenses are funded by the Swiss Foundation for the follow-up care of living  
21  
22 organ donors (SNO). The SNO is supported by the government, research and industry funds  
23  
24 as well as the Swiss Society of Nephrology. The detailed list of sponsors is given at the end of  
25  
26 the manuscript. The running costs of SOL-DHR are kept low as organisation and medical  
27  
28 activities of SOL-DHR are provided on a volunteer base by GT since 1993 and DT since  
29  
30 2000.  
31  
32  
33  
34  
35

36 The basic concept is to cover the costs of kidney donor follow-up via the insurance company  
37  
38 of the kidney recipient, because they would have to pay the dialysis costs if no living donation  
39  
40 had taken place. Coverage includes all costs including those of late complications of the donor  
41  
42 that are causally related to the donation. Hence, the Swiss transplant law requires the health  
43  
44 insurances of the kidney recipients to cover the bills from the family physicians for biennial  
45  
46 donor follow-up as long as the recipient stays alive with an official pay scale. After recipients  
47  
48 death the bills for the donor follow-up are covered by SNO. The bills for the donor follow-up  
49  
50 examination are sent to the SOL-DHR headquarter, which forwards the bill to the health  
51  
52 insurance of the kidney recipient. The costs for the chemical analysis in blood and urine of  
53  
54 donors are covered by the Violliers AG Basel. Cost for drugs required by the donor are paid  
55  
56 by the compulsory health insurance of the donor independently whether the drug treatment is  
57  
58 related to donation or not.  
59  
60

### Handling missing responses

If within 2 months no response is received after invitation (neither a filled out questionnaire from the donor nor the family physician or laboratory) SOL-DHR staff calls the donor. If the donor declares, that he does not longer want to participate he or she will be marked “inactive” in the cohort database and follow-up is suspended. If the donor, however, changes his or her mind, and gets in touch with us again (i.e. after moving back to Switzerland) the status is changed back to “active” immediately at any time.

### Control population

To control for the risk of developing hypertension we plan using two different reference groups. First, we will compare the frequency of occurrence of hypertension in our cohort to that of the MONICA-study with data from a normal Swiss population.<sup>12-14</sup> Second, since living donors are a positive selection out of the normal population we consider them to be “healthier” than the normal population resulting in a potential underreporting of health risks. To directly compare the normal outcome of such a healthy cohort, pooled data from the SOL-DHR’s own healthy donor population taken prior to nephrectomy is used to analyse the outcome of this positively selected donor population after donation.

### Statistical Considerations

Epidemiologic data and patients' descriptives available on continuous scales will be presented with medians, interquartile ranges or means and standard deviations as appropriate. Categorical data will be presented as rates and percentages. Association of individual (independent) variables on the outcome variables will be reported using correlation

1  
2  
3 coefficients. Main outcomes are the occurrence of albuminuria, hypertension and renal  
4  
5 insufficiency as specified above. Secondary outcomes are major somatic and social events  
6  
7 such as death, cardiovascular disease, stroke and depression collected from the questionnaires.  
8  
9

10 All outcomes are considered to be dichotomous.  
11

12  
13 Results from univariate analysis will inform multivariate modelling. Assessment of causal  
14  
15 associations will be performed using multivariate models including potential confounders  
16  
17 along with the independent variables of interest. Prognostic scores will be built using either  
18  
19 multivariate logistic regression analysis or Cox proportional hazard models. Models will be  
20  
21 validated in cross samples. Calibration and discrimination of the cross-validated prognostic  
22  
23 instruments will be assessed using the Brier Score. Time-Series analysis will be performed  
24  
25 using random effects regression models where appropriate.  
26  
27  
28  
29  
30  
31  
32

### 33 Sample Size Calculations 34

35  
36 The analysis is based on the example of hypertension: We assume that 1 additional kidney  
37  
38 donor out of 15 (controls) will develop hypertension. We further assume a follow-up after the  
39  
40 accrual interval of 10 years. Prior data indicate that the median survival time on the control  
41  
42 treatment is 5 years. If the true median survival times on the control and experimental  
43  
44 treatments are 5 and 10 years, respectively, we will need to study 29 subjects developing  
45  
46 hypertension and 435 control subjects to be able to reject the null hypothesis that the  
47  
48 experimental (post surgery) and control (pre-surgery) survival curves are equal with  
49  
50 probability (power) 80%. The Type I error probability associated with this test of this null  
51  
52 hypothesis is 0.05.  
53  
54  
55  
56  
57  
58  
59  
60

## Discussion

This paper describes the rationale and set-up of a lifelong prospective cohort study of living kidney donors in Switzerland. This study offers unique opportunities assessing the frequency of occurrence of unfavourable outcomes following donation and allows determining risk factors associated to them. More specifically, we are particularly interested increasing our understanding of the long term effect of donation on renal function, the risk to develop hypertension or abuminuria and to explore whether adverse outcomes depend on the method of nephrectomy applied. Moreover, the systematic collection of all clinically relevant data and the monitoring of participants on a regular basis allow timely interventions if critical parameters of kidney function or general health change for the worse.

An overview of the existing evidence

In the eighties and early nineties many interesting papers were already available<sup>2-7 15-23</sup>. They all tried to quantify the morbidity and mortality of living kidney donation or unilateral nephrectomy. Most data derive from single centres in the USA, some from Norway or Australia. Unfortunately all published data were collected retrospectively resulting in incomplete data sets and data are prone to selection bias. Based on these retrospective studies kidney donation is now generally accepted as a relatively safe procedure but long-term data that are still quite incomplete<sup>24-27</sup>.

Up to now prospective long-term follow-up of living donors has not been regarded generally as a necessity. The advantage of a prospective long-term follow-up study of living donors as set out in the present protocol is not only likely to improve the quality of the data sets regarding the short term safety of living kidney donation but allows also for a timely intervention if an individual donor experience a potential problem. This will provide important data to clarify the potential need and requirements of long-term donor follow-up.

1  
2  
3  
4  
5  
6 In addition, new questions such as the effect of various surgical techniques have risen  
7  
8 recently. Several methods of endoscopic (including robotic assisted) nephrectomy have been  
9  
10 introduced and have shown to be relatively safe<sup>28-38</sup>. Single centre reports are mainly  
11  
12 defending their own used technology<sup>30 33-36</sup>. Bottom line however, countrywide prospective  
13  
14 cohorts allowing a comparison of various surgical procedures are yet unavailable or in an  
15  
16 early phase comparing no more than two methods<sup>32</sup>.  
17  
18  
19

20  
21 The question whether kidney donation increases the risk for hypertension, which was already  
22  
23 on debate in the eighties<sup>4 16 22</sup>, is still unsettled due to limited studies<sup>29</sup>. We think that the  
24  
25 results of this large national wide prospective cohort study will answer many still open  
26  
27 questions concerning living kidney donor outcome.  
28  
29  
30  
31  
32  
33  
34  
35  
36  
37  
38  
39  
40  
41  
42  
43  
44  
45  
46  
47  
48  
49  
50  
51  
52  
53  
54  
55  
56  
57  
58  
59  
60

## References

1. Butz K. Organ transplantation from the lawyer's viewpoint. *Schw. Ärztezeitschrift* 1987;68:1826-1829.
2. Dunn JF, Nylander WA, Jr., Richie RE, Johnson HK, MacDonell RC, Jr., Sawyers JL. Living related kidney donors. A 14-year experience. *Ann Surg* 1986;203(6):637-43.
3. Westlie L, Fauchald P, Talseth T, Jakobsen A, Flatmark A. Quality of life in Norwegian kidney donors. *Nephrol Dial Transplant* 1993;8(10):1146-50.
4. Torres VE, Offord KP, Anderson CF, Velosa JA, Frohnert PP, Donadio JV, Jr., et al. Blood pressure determinants in living-related renal allograft donors and their recipients. *Kidney Int* 1987;31(6):1383-90.
5. Najarian JS, Chavers BM, McHugh LE, Matas AJ. 20 years or more of follow-up of living kidney donors. *Lancet* 1992;340(8823):807-10.
6. Smith MD, Kappell DF, Province MA, Hong BA, Robson AM, Dutton S, et al. Living-related kidney donors: a multicenter study of donor education, socioeconomic adjustment, and rehabilitation. *Am J Kidney Dis* 1986;8(4):223-33.
7. Miller IJ, Suthanthiran M, Riggio RR, Williams JJ, Riehle RA, Vaughan ED, et al. Impact of renal donation. Long-term clinical and biochemical follow-up of living donors in a single center. *Am J Med* 1985;79(2):201-8.
8. Levey AS, Eckardt KU, Tsukamoto Y, Levin A, Coresh J, Rossert J, et al. Definition and classification of chronic kidney disease: a position statement from Kidney Disease: Improving Global Outcomes (KDIGO). *Kidney Int* 2005;67(6):2089-100.
9. Levey AS, Coresh J, Greene T, Marsh J, Stevens LA, Kusek JW, et al. Expressing the Modification of Diet in Renal Disease Study equation for estimating glomerular filtration rate with standardized serum creatinine values. *Clin Chem* 2007;53(4):766-72.
10. Levey AS, Cattran D, Friedman A, Miller WG, Sedor J, Tuttle K, et al. Proteinuria as a surrogate outcome in CKD: report of a scientific workshop sponsored by the National Kidney Foundation and the US Food and Drug Administration. *Am J Kidney Dis* 2009;54(2):205-26.
11. Dindo D, Demartines N, Clavien PA. Classification of surgical complications: a new proposal with evaluation in a cohort of 6336 patients and results of a survey. *Ann Surg* 2004;240(2):205-13.
12. Wietlisbach V: Personal Communication (comparative data from MONICA to SOL-DHR using the same definition of hypertension) In: Fehrman-Ekholm and Thiel G.: Longterm risks after living kidney donation 2005 p 99-112 (Figure 7-6), ) In the book: Living Donor Kidney Transplantation; edited by Gaston R.S. and Wadström J (Taylor & Francis; London and New York;2005).
13. Wietlisbach V, Barazzoni F. [Outcome and analysis of participation in the 2d MONICA survey (1988-1989) of cardiovascular risk factors]. *Schweiz Med Wochenschr Suppl* 1993;48:13-20.
14. Wietlisbach V, Paccaud F, Rickenbach M, Gutzwiller F. Trends in cardiovascular risk factors (1984-1993) in a Swiss region: results of three population surveys. *Prev Med* 1997;26(4):523-33.

15. Bay WH, Hebert LA. The living donor in kidney transplantation. *Ann Intern Med* 1987;106(5):719-27.
16. Hakim RM, Goldszer RC, Brenner BM. Hypertension and proteinuria: long-term sequelae of uninephrectomy in humans. *Kidney Int* 1984;25(6):930-6.
17. Levey AS, Hou S, Bush HL, Jr. Kidney transplantation from unrelated living donors. Time to reclaim a discarded opportunity. *N Engl J Med* 1986;314(14):914-6.
18. Morris P, St George B, Waring T, Nanra R. Psychosocial complications in living related kidney donors: an Australian experience. *Transplant Proc* 1987;19(2):2840-4.
19. Narkun-Burgess DM, Nolan CR, Norman JE, Page WF, Miller PL, Meyer TW. Forty-five year follow-up after uninephrectomy. *Kidney Int* 1993;43(5):1110-5.
20. Penn I, Halgrimson CG, Ogden D, Starzl TE. Use of living donors in kidney transplantation in man. *Arch Surg* 1970;101(2):226-31.
21. Spital A. Living kidney donation: still worth the risk. *Transplant Proc* 1988;20(5):1051-8.
22. Talseth T, Fauchald P, Skrede S, Djoseand O, Berg KJ, Stenstrom J, et al. Long-term blood pressure and renal function in kidney donors. *Kidney Int* 1986;29(5):1072-6.
23. Weiland D, Sutherland ER, Chavers BM, Simmons L, Ascher NL, Najarian JS. Information of 628 Living-related Kidney donors at a single institution, with long-term follow-up in 472 cases. *Transplant Proc* 1984;16:5-7.
24. Clemens K, Boudville N, Dew MA, Geddes C, Gill JS, Jassal V, et al. The Long-Term Quality of Life of Living Kidney Donors: A Multicenter Cohort Study. *Am J Transplant*;11(3):463-469.
25. Fehrman-Ekholm I, Elinder CG, Stenbeck M, Tyden G, Groth CG. Kidney donors live longer. *Transplantation* 1997;64(7):976-8.
26. Ibrahim HN, Foley R, Tan L, Rogers T, Bailey RF, Guo H, et al. Long-term consequences of kidney donation. *N Engl J Med* 2009;360(5):459-69.
27. Tan JC, Chertow GM. Cautious optimism concerning long-term safety of kidney donation. *N Engl J Med* 2009;360(5):522-3.
28. Bachmann A, Wolff T, Ruzsat R, Giannini O, Dickenmann M, Gurke L, et al. Retroperitoneoscopic donor nephrectomy: a retrospective, non-randomized comparison of early complications, donor and recipient outcome with the standard open approach. *Eur Urol* 2005;48(1):90-6; discussion 96.
29. Boudville N, Prasad GV, Knoll G, Muirhead N, Thiessen-Philbrook H, Yang RC, et al. Meta-analysis: risk for hypertension in living kidney donors. *Ann Intern Med* 2006;145(3):185-96.
30. Capolicchio JP, Saemi A, Trotter S, Plante MK. Retroperitoneoscopic Nephrectomy With a Modified Hand-assisted Approach. *Urology*;77(3):607-11.
31. Dols LF, Kok NF, Ijzermans JN. Live donor nephrectomy: a review of evidence for surgical techniques. *Transpl Int*;23(2):121-30.
32. Dols LF, Kok NF, Terkivatan T, Tran TC, d'Ancona FC, Langenhuijsen JF, et al. Hand-assisted retroperitoneoscopic versus standard laparoscopic donor nephrectomy: HARP-trial. *BMC Surg*;10:11.



- 1  
2  
3  
4  
5  
6  
7  
8  
9  
10  
11  
12  
13  
14  
15  
16  
17  
18  
19  
20  
21  
22  
23  
24  
25  
26  
27  
28  
29  
30  
31  
32  
33  
34  
35  
36  
37  
38  
39  
40  
41  
42  
43  
44  
45  
46  
47  
48  
49  
50  
51  
52  
53  
54  
55  
56  
57  
58  
59  
60
33. Hoda MR, Greco F, Wagner S, Heynemann H, Fornara P. Prospective, nonrandomized comparison between right- and left-sided hand-assisted laparoscopic donor nephrectomy. *Transplant Proc*;43(1):353-6.
34. Jacobs SC, Cho E, Dunkin BJ, Bartlett ST, Flowers JL, Jarrell B. Laparoscopic nephrectomy in the markedly obese living renal donor. *Urology* 2000;56(6):926-9.
35. Kohei N, Kazuya O, Hirai T, Miyauchi Y, Iida S, Shirakawa H, et al. Retroperitoneoscopic living donor nephrectomy: experience of 425 cases at a single center. *J Endourol*;24(11):1783-7.
36. Ma L, Ye J, Huang Y, Hou X, Zhao L, Wang G. Retroperitoneoscopic live-donor nephrectomy: 5-year single-center experience in China. *Int J Urol*;17(2):158-62.
37. Troppmann C, Daily MF, McVicar JP, Troppmann KM, Perez RV. The transition from laparoscopic to retroperitoneoscopic live donor nephrectomy: a matched pair pilot study. *Transplantation*;89(7):858-63.
38. Wadstrom J, Biglarnia A, Gjertsen H, Sugitani A, Fronck J. Introducing hand-assisted retroperitoneoscopic live donor nephrectomy: learning curves and development based on 413 consecutive cases in four centers. *Transplantation*;91(4):462-9.

### Competing interests

The authors declare that they have no competing interests.

### Authors' contributions

Professor Thiel was involved in the conception and design of the study, drafted the protocol, supervised the revisions and approved the final manuscript. Dr. Tsinalis was involved in conception and design of this study, revised the draft critically for intellectual content and approved the final revised manuscript. Ms Nolte was involved in the conception of the study, revised the draft critically for intellectual content and approved the final manuscript.

### Acknowledgments

We are indebted to the medical / surgical team and the transplant coordinators of the Transplant Centres of Basel, Bern, Geneva, Lausanne, St. Gallen and Zürich. We would like to thank Ruth Lützel Schwab and Christina Wolf-Heidegger for secretarial help. Also, we are grateful to Thomas Voegelé (Transplant coordinator) for his initial participation, when SOL-DHR was started (1993) and to Hanspeter Hort (graphic artist) for designing the SOL-DHR logo for free. We thank Guy Kollwelter and Heinz Herrmann (both from Astellas) for providing us with medals and individual diplomas for living donors.

This study receives funding from various sponsors (see below). The funding bodies had no role in study design, in the collection, analysis and interpretation of data in the writing of the manuscripts and in the decision to submit the manuscript for publication.

### Main Sponsors:

Viollier AG, Novartis Pharma Schweiz AG, Alfred and Erika Baer-Spycher-Stiftung, Astellas Pharma AG, Fresenius Medical care (Switzerland) AG, Roche Pharma (Switzerland) AG

### Regular Sponsors:

1  
2  
3 AMGEN (Switzerland) AG, Fresenius Biotech GmbH, Wyeth Pharmaceuticals AG, Spirig  
4  
5  
6 Pharma AG, diverse private Sponsors  
7

8  
9 **Other Sponsors:**

10  
11 Schweizerische Gesellschaft für Nephrologie SGN, Bundesamt für Gesundheit, HP Hort,  
12  
13 Pfizer AG, Sanofi-Aventis (Switzerland) AG, Genzyme GmbH, H.U. Böhi, P. Roth Yin Yee,  
14  
15 Oliver Boidol, B. Braun Medical AG, Schweizer Nierenliga, Gambro Hospal (Switzerland)  
16  
17  
18 AG, Baxter AG.  
19  
20  
21  
22  
23  
24  
25  
26  
27  
28  
29  
30  
31  
32  
33  
34  
35  
36  
37  
38  
39  
40  
41  
42  
43  
44  
45  
46  
47  
48  
49  
50  
51  
52  
53  
54  
55  
56  
57  
58  
59  
60



**Prospective Swiss cohort study of living-kidney donors -  
Study protocol**

|                                 |                                                                                                                                                                                                                                                                                                                                                                                         |
|---------------------------------|-----------------------------------------------------------------------------------------------------------------------------------------------------------------------------------------------------------------------------------------------------------------------------------------------------------------------------------------------------------------------------------------|
| Journal:                        | <i>BMJ Open</i>                                                                                                                                                                                                                                                                                                                                                                         |
| Manuscript ID:                  | bmjopen-2011-000202.R2                                                                                                                                                                                                                                                                                                                                                                  |
| Article Type:                   | Protocol                                                                                                                                                                                                                                                                                                                                                                                |
| Date Submitted by the Author:   | 13-Sep-2011                                                                                                                                                                                                                                                                                                                                                                             |
| Complete List of Authors:       | Thiel, Gil; University Hospital of Basel, SOL-DHR auf der Klinik Abteilung Transplantationsimmunologie und Nephrologie<br>Nolte, Christa; University Hospital of Basel, SOL-DHR auf der Klinik Abteilung Transplantationsimmunologie und Nephrologie<br>Tsinalis, Dimitrios; University Hospital of Basel, SOL-DHR auf der Klinik Abteilung Transplantationsimmunologie und Nephrologie |
| <b>Primary Subject Heading</b>: | Renal medicine                                                                                                                                                                                                                                                                                                                                                                          |
| Keywords:                       | Renal transplantation < NEPHROLOGY, Transplant surgery < SURGERY, EPIDEMIOLOGY                                                                                                                                                                                                                                                                                                          |
|                                 |                                                                                                                                                                                                                                                                                                                                                                                         |

SCHOLARONE™  
Manuscripts

## Prospective Swiss cohort study of living-kidney donors - Study protocol

Gilbert T. Thiel<sup>1</sup> \*, Christa Nolte<sup>1</sup>, Dimitrios Tsinalis<sup>2</sup>

[1]

SOL-DHR (Swiss Organ Living Donor Health Registry)

At the Division of Transplant Immunology and Nephrology in the  
University Hospital of Basel, Switzerland

[2]

SOL-DHR (Division of Nephrology),  
Kantonsspital St. Gallen, Switzerland)

### \* Corresponding Author

Professor Gilbert T. Thiel, University Hospital of Basel, SOL-DHR auf der Klinik Abteilung  
Transplantationsimmunologie und Nephrologie, Petersgraben 4, Basel, 4056 Switzerland

### e-mail Addresses:

Gilbert T. Thiel: [gil.thiel@unibas.ch](mailto:gil.thiel@unibas.ch)

Christa Nolte: [cnolte@uhbs.ch](mailto:cnolte@uhbs.ch)

Dimitrios Tsinalis: [dimitrios.tsinalis@kssg.ch](mailto:dimitrios.tsinalis@kssg.ch)

## ABSTRACT

*Background* Offering living kidney donation raised the concern that donors are exposed to unknown risks. All Swiss transplant centres therefore decided to start a prospective cohort study of living kidney donors in Switzerland. This paper describes the rationale for and implementation of this cohort study.

*Methods/Design* All kidney donors in Switzerland are registered and examined before donation and biennially after donation starting in the first year after nephrectomy. Before each follow-up visit, the study centre sends a package to the kidney donor containing the health questionnaire, blood and urine tubes and a pre-paid envelope for sending the samples to the central laboratory. The donor makes an appointment with his family physician, who examines the donor and reports findings such as pain and other complains, blood pressure, creatinine, albumin and all major health events and the state of mental and social well-being to the study centre. The family doctor draws the blood sample and mails it with the urine sample in the pre-paid envelope. All data are centrally managed. All abnormal findings in the follow-up of individual donors are regularly discussed with the principal investigator and necessary clinical changes made, and recorded in the database. The health insurance of the recipient covers all costs of the donor follow up. Main outcomes are the occurrence of albuminuria, hypertension and renal insufficiency. Secondary outcomes are major somatic and social events such as death, cardiovascular disease, stroke and depression.

*Discussion* This prospective cohort offers unique opportunities to assess the risks of living kidney donation and will allow us to examine the risks associated with the methods used for nephrectomy in Switzerland (various forms of open surgery and laparoscopic nephrectomy). The prospective collection of all clinically-relevant data and the regular monitoring of donors will allow timely interventions at early stages before serious kidney general health problems occur.

## BACKGROUND

Living kidney donors have been used in Switzerland since 1967 but at a low rate. This, however, changed in the early nineties. Rapid expansion of live kidney transplantation took place especially in the large transplant centre in Basel that had for the two previous decades rejected live donation on ethical grounds. The increase in live donor transplantation was not universally regarded as a benefit. A lawyer wrote in the Swiss Medical Journal that “organ removal from a living person for transplantation is an intended bodily injury according to civil and criminal law”(1). Concerns were raised over the safety of live organ donation for the donors. The available published data from retrospective studies were largely incomplete. In these studies the percent of donors without follow up data ranged from 21% (2, 3) to 31% (4), to 42% (5, 6) up to 77% (7). Indeed, given the available evidence, fair counselling of potential living donors is challenging.

Since living donor transplantation was mainly propagated by the Basel transplant centre, we felt obliged to offer a long-time follow up of the health state of living organ donors for all Swiss transplant centres. This idea was well accepted by the other five Swiss centres (Bern, Geneva, Lausanne, St. Gallen and Zürich) and consequently, the cohort study by the name of SOL-DHR (Swiss Organ Living Donor Health Registry) was initiated in April 1993.

This paper describes the rationale for and implementation of this prospective cohort study. We aim to assess the prevalence of complications of living kidney donation and to identify risk profiles associated with unfavourable outcomes. We will assess the results of different surgical options for donation. In particular, the study is designed to prospectively quantify the risks to donors after living kidney donation: the development of hypertension, albuminuria, renal failure and psychological diseases. The infrastructure will also assist in the management of individual donors at an early stage if such complications occur.

## METHODS

Prospective cohort study: There was an a priori consensus among the founding members that health state of all consenting eligible living kidney donors should be assessed life-long at regular time intervals in the context of a prospective cohort study. The protocol and the questionnaires were approved by the Ethical Committee of the University Hospital of Basel and the Swiss Academy of Medical Science (SAMW). No informed consent is required as lifelong follow up of living donor's health state is required by the Swiss Transplant Law and may be studied, as long as data are analysed anonymously. However, to assure compliance to the long-term follow-up protocol, donors are informed about the aims of the protocol and the registry before their donation. In addition, kidney donors have at any time after donation the option to stop participating by simply ignoring the invitation from SOL-DHR to visit their family physician.

Donors from all six kidney transplant centres have been included in the SOL-DHR since 1993. Until the end of 2010 a total of 1332 living kidney donors have been included (Basel n = 521, Berne n = 119, Geneva n = 111, Lausanne n = 151, St Gallen n = 79 and Zurich n = 360).

### Main objectives

- Obtain prospective outcome data from consecutive living kidney donors in Switzerland
- Quantify the risks for early and late complications due to nephrectomy
- Improve the information given to future potential donors before agreeing to donate a kidney and to produce standardized evidence based educational materials



- 1
- 2
- 3 – Install a system of timely intervention in case of development of markers of increased
- 4 risk or new health problems
- 5
- 6
- 7
- 8
- 9 – Compare outcomes from different methods of nephrectomy
- 10
- 11
- 12 – Provide a neutral platform for donors to express complaints and receive help
- 13
- 14
- 15
- 16

### 17 **Data collection principles**

18 Before kidney donation, the transplant centre is responsible for including patients in the study  
19 and for the first medical examination before kidney donation (see basic medical questionnaire  
20 below). At the time of discharge after nephrectomy, the transplant centre submits a second  
21 questionnaire (the early complications questionnaire). Thereafter the SOL-DHR centre  
22 organises a lifelong follow up after nephrectomy at 1 year, 3 years, 5 years, 7 years, 10 years  
23 and biennially thereafter. The kidney donors are examined by their family physicians in the  
24 vicinity where they live. Before each follow up visit, the SOL-DHR centre sends a package to  
25 the kidney donor asking the donor to make an appointment with the present family physician  
26 of his or her choice. This contains the brief information for the donor and the family  
27 physician, a health questionnaire, tubes for blood and urine samples and a pre-paid envelope  
28 for sending the samples at room temperature to the central laboratory (Viollier AG Basel).  
29 The basic biannual follow-up questionnaire is filled in by the family physician. Every 5 years  
30 the donor fills in the additional SF8 and social status questionnaire (see below).  
31

32 If no response from the donor is received within 2 months after the follow-up material was  
33 sent out, SOL-DHR initiates a search for the donor, contacting the recipient, the donor's  
34 health insurance and the public registries to identify whether the donor has died and if so, the  
35 cause of death.  
36  
37  
38  
39  
40  
41  
42  
43  
44  
45  
46  
47  
48  
49  
50  
51  
52  
53  
54  
55  
56  
57  
58  
59  
60

1  
2  
3 Results from the blood and urine analysis by the central laboratory are sent to the family  
4  
5 physician and to the cohort manager at SOL-DHR.  
6  
7

### 8 **Participation of family physicians**

9  
10 Whereas kidney recipients live usually in the area of the transplant centre, kidney donors  
11  
12 often do not. Donors are not likely to adhere to a recommendation to travel lifelong  
13  
14 biannually to a distant transplant centre for follow up; particularly since travel expenses are  
15  
16 not covered. We believe that adherence will be much greater if follow up can be coordinated  
17  
18 by the patient's own local family physician. Family physicians, aided by trainees at the  
19  
20 transplant centre follow the protocols provided by the study centre.  
21  
22  
23  
24  
25  
26  
27  
28

### 29 **Collected data**

#### 30 *Laboratory data*

31  
32 We analyze creatinine in blood and urine, albumin and protein in urine centrally. The method  
33  
34 used to quantify creatinine in blood changed over the years: 1993 -1996 Jaffee, 1997 -2003  
35  
36 enzymatic assay (Roche), 2004 – 2005 “Jaffe compensated” (Roche), 2006 – August 2007  
37  
38 “Jaffe corrected” (Siemens), and since September 2007 an enzymatic assay (Siemens). In  
39  
40 order to avoid systematic errors due to different assays prior to the data base entry all values  
41  
42 are converted to values traceable to isotope dilution mass spectrometry (IDMS) as  
43  
44 recommended by the KDIGO consensus conference (8) using calibration data supplied by the  
45  
46 assay's manufacturers (data available on request). Albumin in urine is measured by  
47  
48 turbidimetry after antigen-antibody reaction using the endpoint method (Roche Diagnostics).  
49  
50  
51 Whenever during a follow up a laboratory results (creatinine or albumin/creatinine ratio)  
52  
53 exceeds the expected range in an individual donor, the sampling and the laboratory analysis is  
54  
55 repeated.  
56  
57  
58  
59  
60

## Definitions

### *Estimation of the glomerular filtration rate (GFR)*

To estimate GFR, we use the MDRD equation for IDMS-traceable creatinine values (9)

eGFR (mL/min/1.73 m<sup>2</sup>) =

$$175 \times (\text{Scr}/88.4)^{-1.154} \times (\text{Age})^{-0.203} \times (0.742^*) \times (1.212^+) \text{ * If female + If African}$$

### *Micro-albuminuria (= high albumin excretion)*

We assume a daily urinary excretion of 10 mmol creatinine/day as being normal for donors (using this mean value for both genders taken together; an underestimate for males, and an overestimate for females). We will report albuminuria as albumin:creatinine ratios using the cut points defined by the report of the scientific workshop sponsored by the National Kidney Foundation and the US Food and Drug Administration. (10) The cut- point for microalbuminuria or high albumin excretion is > 30 mg/g ( $\geq 3.3$  mg/mmol). For clarity reasons we will use the term microalbuminuria which is commonly used in Europe rather than the term “high albumin excretion” used in North America. The cut-point for macroalbuminuria (proteinuria) or very high albumin excretion is >300 mg/g (> 33.9 mg/mmol).

### *Hypertension*

Donors who have a systolic pressure above 140 mm Hg or diastolic above 90 mmHg or both or who are taking any antihypertensive drug are classified as hypertensive. In any case of new onset hypertension, we ask the family physician to perform a 24-hour ambulatory blood

1  
2  
3 pressure recording. If hypertension is confirmed, we recommend antihypertensive treatment  
4  
5 with and ACE inhibitor or an angiotensin receptor blocker.  
6  
7  
8  
9

### 10 11 **Health status data**

12  
13  
14 At each visit, the family physician is asked to measure the actual weight, height and blood  
15  
16 pressure (3 times in sitting position), and the bare abdomen of the donor in an upright posture  
17  
18 to look for an incisional hernia or abdominal wall bulging caused by the nephrectomy. When  
19  
20 the donor is complaining about pain at any specific place (e.g., lumbar back pain), it should be  
21  
22 examined and evaluated, whether it is or could be causally related to nephrectomy. We ask  
23  
24 for careful documentation of new symptoms, comorbidities or other problems (somatic,  
25  
26 mental, or social).  
27  
28  
29  
30  
31  
32  
33

### 34 *Questionnaires*

- 35  
36  
37 - The basic medical questionnaire to be collected before donation:  
38  
39 The basic medical questionnaire collects information on body weight, sitting blood  
40  
41 pressure (3 times), description of the nephrectomy scar, pain or new problems since  
42  
43 the last examination and an inventory of all drugs currently taken. The questionnaire  
44  
45 before donation also includes “major disease and back pain”, since we realize that  
46  
47 back pain is such a common complaint that we need information before donation in  
48  
49 order classify back pain after donation in a meaningful way.  
50  
51  
52  
53  
54 - Early complication questionnaire to be collected at the time of hospital discharge after  
55  
56 nephrectomy (since 1998):  
57  
58 This questionnaire collects data on the side and method used for nephrectomy and all  
59  
60 complications occurring peri- and post-operatively including blood transfusions,

1  
2  
3 whether the endoscopic procedure had to be changed intraoperatively and whether  
4 surgical revision was necessary. Early postoperative pain, which reflects pain at the  
5 site of incision and sometimes in case of endoscopic nephrectomy additional shoulder  
6 pain do to body positioning during surgery, is assessed using the visual analogue  
7 scale. The questionnaire is filled out usually 2 weeks after nephrectomy. For grading  
8 early complications we use the Clavien scale (11). Every early complication observed  
9 in a donor is classified along the Clavien scale (Grade I = 1, grade II = 2, grade IIIa =  
10 3, grade IIIb = 3.5, grade Iva = 4, grade IVb = 4.5 etc.). If multiple complications  
11 occur in the same donor, the single Clavien scores are added to what is called the  
12 Clavien sum per donor score. We also calculate the simple sum of observed  
13 complications per donor. The two sums have different interpretations. For a given  
14 group of donors, eg, older than 60 years, the mean simple sum of complications shows  
15 the frequency of early complications seen in elderly donors, whereas the mean Clavien  
16 sum shows their severity.

17  
18  
19  
20  
21  
22  
23  
24  
25  
26  
27  
28  
29  
30  
31  
32  
33  
34  
35  
36  
37 - The basic biannual follow up questionnaire

38 We ask the family physician to measure body weight, sitting blood pressure (3 times),  
39 examine the nephrectomy scar and to take an interim medical history in order to  
40 complete the medical questionnaire. This includes questions about pain and all serious  
41 health problems (eg, stroke, cardiovascular events, diabetes or malignancies) since the  
42 last examination. Back pain is considered to be related to the nephrectomy only if  
43 specified by the donor or his physician as being clearly more intense than before  
44 donation. (Pain related to nephrectomy can be caused by instability of the abdominal  
45 wall after large lumbar incision with partial muscular palsy.) The family physician  
46 records all drugs currently taken; performs a bedside dipstick examination of the urine  
47 and fills blood and urine vials and send both vials to the central laboratory. If the  
48 urinary dipstick turns out to be positive for blood, protein, white blood cells or other  
49  
50  
51  
52  
53  
54  
55  
56  
57  
58  
59  
60

1  
2  
3 abnormalities, we request that the family doctor make an additional microscopic  
4 examination of the urinary sediment. All clinical data are sent to the SOL-DHR study  
5  
6  
7  
8 centre.

- 9  
10  
11 - The SF-8 questionnaire has been collected every 5 years after donation since 2002.

12  
13 The validated SF-8 multiple choice questionnaire is used to calculate the Physical  
14  
15 Component Summary (PCS) and the Mental Component Summary (MCS).

16  
17 We ask three supplementary multiple choice questions, which are analysed separately:

18  
19 1) In comparison to one year ago how would you describe your actual health? 2) How  
20  
21 has your emotional relationship with the kidney recipient changed since donation? 3)  
22  
23 Would you donate a kidney again, if you still had two kidneys?  
24  
25

- 26  
27  
28 - Social status questionnaire

29  
30 Since 2002 we have used an instrument developed by SOL-DHR that contains  
31  
32 multiple choice questions about the actual professional activity, working capacity,  
33  
34 efficiency, and physical fitness of the donor, along with two open questions: 1) draw  
35  
36  
37 backs because of donation (eg, financial, insurance, pension fund or professional  
38  
39 disadvantages) and 2) donor's suggestions for possible improvement for SOL-DHR  
40  
41 activities (What can SOL-DHR do better for you?)  
42  
43  
44  
45  
46  
47  
48  
49

### 50 **Data monitoring and quality assurance**

51 All incoming data are checked by staff for completeness and plausibility, and are entered into  
52  
53 an electronic database. In case of missing or implausible data, we call the office of the family  
54  
55 physician and attempt to rectify this. Once or twice a month staff discuss any donor with an  
56  
57 an abnormality with the principal investigator. Urgent cases are discussed immediately and  
58  
59 interventions are initiated without delay. All outcomes are stored within the database.  
60

1  
2  
3 The “principle of intervention” is a key feature of this cohort study. Thus, we do not only  
4 observe our cohort, but we also intervene actively, as soon as any risk factor changes or  
5 clinical problem develops. Study leaders make recommendations for interventions which are  
6 then implemented by the family physician. Recommendations may include performing a  
7 diagnostic procedure like the 24-hour ambulatory blood pressure measurement in order to  
8 confirm hypertension, to perform an ultrasound of the remaining kidney or to repeat the  
9 chemical analysis. The letter may also contain a recommendation for treatment.  
10  
11  
12  
13  
14  
15  
16  
17  
18  
19  
20  
21  
22

### 23 **Funding of SOL-DHR and reimbursement for follow-up examinations**

24  
25  
26 The SOL-DHR expenses are funded by the Swiss Foundation for the follow-up care of living  
27 organ donors (SNO). The SNO is supported by the government, research and industry funds  
28 as well as the Swiss Society of Nephrology. The detailed list of sponsors is given at the end of  
29 the manuscript. The running costs of SOL-DHR are kept low as organisation and medical  
30 activities of SOL-DHR are provided on a volunteer basis by G.T. since 1993 and D.T. since  
31 2000.  
32  
33  
34  
35  
36  
37  
38  
39  
40

41 The basic concept is to cover the costs of kidney donor follow up via the insurance company  
42 of the kidney recipient; because they would have paid ongoing dialysis costs had no living  
43 donation taken place. Coverage includes all costs including those of late complications of the  
44 donor that are causally related to the donation. Hence, Swiss transplant law requires the health  
45 insurance of the kidney recipients to cover the bills from the family physicians for biannual  
46 donor follow-up (according to a fixed payment schedule) as long as the recipient is alive..  
47  
48  
49  
50  
51  
52  
53  
54

55 After the recipients’ death the bills for the donor follow up are covered by SNO. The bills for  
56 donor follow up examination are sent to the SOL-DHR centre, which forwards the bill to the  
57 health insurance of the kidney recipient. The costs for the chemical analysis in blood and  
58 urine of donors are covered by the Violliers AG Basel since 1993. Cost for drugs required by  
59  
60

1  
2  
3 the donor are paid by the compulsory health insurance of the donor, whether the drug  
4  
5 treatment is related to donation or not.  
6  
7  
8  
9

### 10 11 **Handling missing responses**

12  
13  
14 If no response is received by 2 months after an invitation has been sent (neither a filled out  
15  
16 questionnaire from the donor nor the family physician or laboratory) SOL-DHR staff call the  
17  
18 donor. If the donor declines to participate further, he or she will be marked “inactive” in the  
19  
20 cohort database and follow up is suspended. If the donor later changes his or her mind, and  
21  
22 gets in touch with us again (eg, after moving back to Switzerland) the status is changed back  
23  
24 to “active” immediately.  
25  
26  
27  
28  
29  
30  
31

### 32 33 **Control population**

34  
35 To control for the risk of developing hypertension we plan using two different reference  
36  
37 groups. First, we will compare the incidence and prevalence of hypertension in our cohort  
38  
39 with that of the MONICA study (data from a normal Swiss population). (12-14)Second, since  
40  
41 living donors are positively selected from the normal population we consider them to be  
42  
43 “healthier” than the normal population resulting in a potential underreporting of health risks.  
44  
45 To directly compare the normal outcome of such a healthy cohort, pooled data from the SOL-  
46  
47 DHR’s own healthy donor population taken prior to nephrectomy (n=1332) is used to analyse  
48  
49 the outcome of this positively-selected donor population after donation.  
50  
51  
52  
53  
54  
55  
56

### 57 58 **Statistical considerations**

59  
60 Continuous data will be presented with medians, interquartile ranges or means and standard  
deviations as appropriate and categorical data as rates and percentages. The association of



1  
2  
3 independent variables with the outcome variables will be reported using correlation  
4  
5 coefficients. Main outcomes are the occurrence of albuminuria, hypertension and renal  
6  
7 insufficiency as specified above. Secondary outcomes are major somatic and social events  
8  
9 such as death, cardiovascular disease, stroke and depression collected from the questionnaires.  
10  
11  
12 All outcomes are considered to be dichotomous.

13  
14  
15 Results from univariate analysis will inform multivariable modelling. Assessment of causal  
16  
17 associations will be performed using multivariable models including potential confounders  
18  
19 along with the independent variables of interest. Prognostic scores will be built using either  
20  
21 multivariate logistic regression analysis or Cox proportional hazard models. Models will be  
22  
23 validated in cross samples. Calibration and discrimination of the cross-validated prognostic  
24  
25 instruments will be assessed using the Brier Score. Time series analysis will be performed  
26  
27 using random-effects regression models where appropriate.  
28  
29  
30

### 31 32 Sample size calculations

33  
34  
35 The analysis is based on the example of hypertension: We assume that 1 additional kidney  
36  
37 donor out of 15 (controls) will develop hypertension. We further assume a follow up after the  
38  
39 accrual interval of 10 years. Prior data indicate that the median time for onset of hypertension  
40  
41 (survival time) on the control treatment is 5 years. If the true median survival times on the  
42  
43 experimental and control treatments are 5 and 10 years, respectively, we will need to study 29  
44  
45 subjects developing hypertension and 435 control subjects to be able to reject the null  
46  
47 hypothesis that the experimental (post surgery) and control (pre-surgery) survival curves are  
48  
49 equal with probability (power) 80%. The Type I error probability associated with this test of  
50  
51 this null hypothesis is 0.05.  
52  
53  
54  
55  
56  
57  
58  
59  
60

## Discussion

This paper describes the rationale for, and organization of a lifelong prospective cohort study of living kidney donors in Switzerland. This study offers unique opportunities to assess the frequency of occurrence of unfavourable outcomes following donation and allows determining risk factors associated to them. More specifically, we are particularly interested in increasing our understanding of the long term effect of donation on renal function, the risk of developing hypertension or albuminuria and exploring whether adverse outcomes depend on the method of nephrectomy applied. Moreover, the systematic collection of all clinically relevant data and the monitoring of participants on a regular basis allow timely interventions if kidney functions or general health change for the worse.

An overview of the existing evidence

In the eighties and early nineties many interesting papers were already available (2-7, 15-23). They all tried to quantify the morbidity and mortality of living kidney donation or unilateral nephrectomy. Most data derive from single centres in the USA, some from Norway or Australia. Unfortunately all published data were collected retrospectively resulting in incomplete data sets, and the data are affected by selection bias. Based on these retrospective studies kidney donation is now generally accepted as a relatively safe procedure but long-term data prospective studies of consecutive patients are lacking (24-27).

Up to now prospective long-term follow-up of living donors has not been regarded generally as a necessity. Prospective long-term follow-up study of living donors as set out in the present protocol is not only likely to improve the quality of the data on the short- and medium-term safety of living kidney donation, but also allows for timely intervention if an individual donor

1  
2  
3 experiences a potential problem. Data generated will inform policy on optimal long-term  
4  
5 donor follow-up.  
6  
7  
8  
9

10  
11 In addition, new questions such as the effect of various surgical techniques have arisen  
12 recently. Several methods of endoscopic (including robotic assisted) nephrectomy have been  
13 introduced and have been shown to be relatively safe(28-38). Single centre reports mainly  
14 concentrate on a single technology rather than providing unbiased comparisons of different  
15 methods (30, 33-36). To our knowledge, no national prospective cohorts have yet reported on  
16 these issues and those that are planned will compare only two methods (32).  
17  
18  
19  
20  
21  
22  
23  
24  
25

26 The question of whether kidney donation increases the risk for hypertension, which was  
27 already debated in the eighties (4, 16, 22), is still unsettled due to limited studies (29). We  
28 think that the results of this large national wide prospective cohort study will address many  
29 important unanswered questions about outcomes in living kidney donors.  
30  
31  
32  
33  
34  
35  
36  
37  
38  
39  
40  
41  
42  
43  
44  
45  
46  
47  
48  
49  
50  
51  
52  
53  
54  
55  
56  
57  
58  
59  
60

## References

1. Butz K. Organ transplantation from the lawyer's viewpoint. *Schw Ärztezeitschrift*. 1987;68:1826-9.
2. Dunn JF, Nylander WA, Jr., Richie RE, et al. Living related kidney donors. A 14-year experience. *Ann Surg*. 1986 Jun;203(6):637-43.
3. Westlie L, Fauchald P, Talseth T, et al. Quality of life in Norwegian kidney donors. *Nephrol Dial Transplant*. 1993;8(10):1146-50.
4. Torres VE, Offord KP, Anderson CF, et al. Blood pressure determinants in living-related renal allograft donors and their recipients. *Kidney Int*. 1987 Jun;31(6):1383-90.
5. Najarian JS, Chavers BM, McHugh LE, et al. 20 years or more of follow-up of living kidney donors. *Lancet*. 1992 Oct 3;340(8823):807-10.
6. Smith MD, Kappell DF, Province MA, et al. Living-related kidney donors: a multicenter study of donor education, socioeconomic adjustment, and rehabilitation. *Am J Kidney Dis*. 1986 Oct;8(4):223-33.
7. Miller IJ, Suthanthiran M, Riggio RR, et al. Impact of renal donation. Long-term clinical and biochemical follow-up of living donors in a single center. *Am J Med*. 1985 Aug;79(2):201-8.
8. Levey AS, Eckardt KU, Tsukamoto Y, et al. Definition and classification of chronic kidney disease: a position statement from Kidney Disease: Improving Global Outcomes (KDIGO). *Kidney Int*. 2005 Jun;67(6):2089-100.
9. Levey AS, Coresh J, Greene T, et al. Expressing the Modification of Diet in Renal Disease Study equation for estimating glomerular filtration rate with standardized serum creatinine values. *Clin Chem*. 2007 Apr;53(4):766-72.
10. Levey AS, Cattran D, Friedman A, et al. Proteinuria as a surrogate outcome in CKD: report of a scientific workshop sponsored by the National Kidney Foundation and the US Food and Drug Administration. *Am J Kidney Dis*. 2009 Aug;54(2):205-26.
11. Dindo D, Demartines N, Clavien PA. Classification of surgical complications: a new proposal with evaluation in a cohort of 6336 patients and results of a survey. *Ann Surg*. 2004 Aug;240(2):205-13.
12. Wietlisbach V: Personal Communication (comparative data from MONICA to SOL-DHR using the same definition of hypertension) in Fehrman-Ekholm and Thiel G.: Longterm risks after living kidney donation 2005 p 99-112 (Figure 7-6); *Living Donor Kidney Transplantation*; edited by Gaston R.S. and Wadström J (Taylor & Francis; London and New York;2005)
13. Wietlisbach V, Barazzoni F. [Outcome and analysis of participation in the 2d MONICA survey (1988-1989) of cardiovascular risk factors]. *Schweiz Med Wochenschr Suppl*. 1993;48:13-20.
14. Wietlisbach V, Paccaud F, Rickenbach M, et al. Trends in cardiovascular risk factors (1984-1993) in a Swiss region: results of three population surveys. *Prev Med*. 1997 Jul-Aug;26(4):523-33.
15. Bay WH, Hebert LA. The living donor in kidney transplantation. *Ann Intern Med*. 1987 May;106(5):719-27.

16. Hakim RM, Goldszer RC, Brenner BM. Hypertension and proteinuria: long-term sequelae of uninephrectomy in humans. *Kidney Int.* 1984 Jun;25(6):930-6.
17. Levey AS, Hou S, Bush HL, Jr. Kidney transplantation from unrelated living donors. Time to reclaim a discarded opportunity. *N Engl J Med.* 1986 Apr 3;314(14):914-6.
18. Morris P, St George B, Waring T, et al. Psychosocial complications in living related kidney donors: an Australian experience. *Transplant Proc.* 1987 Apr;19(2):2840-4.
19. Narkun-Burgess DM, Nolan CR, Norman JE, et al. Forty-five year follow-up after uninephrectomy. *Kidney Int.* 1993 May;43(5):1110-5.
20. Penn I, Halgrimson CG, Ogden D, et al. Use of living donors in kidney transplantation in man. *Arch Surg.* 1970 Aug;101(2):226-31.
21. Spital A. Living kidney donation: still worth the risk. *Transplant Proc.* 1988 Oct;20(5):1051-8.
22. Talseth T, Fauchald P, Skrede S, et al. Long-term blood pressure and renal function in kidney donors. *Kidney Int.* 1986 May;29(5):1072-6.
23. Weiland D, Sutherland ER, Chavers BM, et al. Information of 628 Living-related Kidney donors at a single institution, with long-term follow-up in 472 cases. *Transplant Proc.* 1984;16:5-7.
24. Clemens K, Boudville N, Dew MA, et al. The Long-Term Quality of Life of Living Kidney Donors: A Multicenter Cohort Study. *Am J Transplant.* Mar;11(3):463-9.
25. Fehrman-Ekholm I, Elinder CG, Stenbeck M, et al. Kidney donors live longer. *Transplantation.* 1997 Oct 15;64(7):976-8.
26. Ibrahim HN, Foley R, Tan L, et al. Long-term consequences of kidney donation. *N Engl J Med.* 2009 Jan 29;360(5):459-69.
27. Tan JC, Chertow GM. Cautious optimism concerning long-term safety of kidney donation. *N Engl J Med.* 2009 Jan 29;360(5):522-3.
28. Bachmann A, Wolff T, Ruzsat R, et al. Retroperitoneoscopic donor nephrectomy: a retrospective, non-randomized comparison of early complications, donor and recipient outcome with the standard open approach. *Eur Urol.* 2005 Jul;48(1):90-6; discussion 6.
29. Boudville N, Prasad GV, Knoll G, et al. Meta-analysis: risk for hypertension in living kidney donors. *Ann Intern Med.* 2006 Aug 1;145(3):185-96.
30. Capolicchio JP, Saemi A, Trotter S, et al. Retroperitoneoscopic Nephrectomy With a Modified Hand-assisted Approach. *Urology.* Mar;77(3):607-11.
31. Dols LF, Kok NF, Ijzermans JN. Live donor nephrectomy: a review of evidence for surgical techniques. *Transpl Int.* Feb;23(2):121-30.
32. Dols LF, Kok NF, Terkivatan T, et al. Hand-assisted retroperitoneoscopic versus standard laparoscopic donor nephrectomy: HARP-trial. *BMC Surg.*10:11.
33. Hoda MR, Greco F, Wagner S, et al. Prospective, nonrandomized comparison between right- and left-sided hand-assisted laparoscopic donor nephrectomy. *Transplant Proc.* Jan-Feb;43(1):353-6.
34. Jacobs SC, Cho E, Dunkin BJ, et al. Laparoscopic nephrectomy in the markedly obese living renal donor. *Urology.* 2000 Dec 20;56(6):926-9.
35. Kohei N, Kazuya O, Hirai T, et al. Retroperitoneoscopic living donor nephrectomy: experience of 425 cases at a single center. *J Endourol.* Nov;24(11):1783-7.

- 1  
2  
3 36. Ma L, Ye J, Huang Y, et al. Retroperitoneoscopic live-donor nephrectomy: 5-year  
4 single-center experience in China. *Int J Urol*. Feb;17(2):158-62.  
5  
6 37. Troppmann C, Daily MF, McVicar JP et al. The transition from laparoscopic to  
7 retroperitoneoscopic live donor nephrectomy: a matched pair pilot study. *Transplantation*.  
8 Apr 15;89(7):858-63.  
9  
10 38. Wadstrom J, Biglarnia A, Gjertsen H, et al. Introducing hand-assisted  
11 retroperitoneoscopic live donor nephrectomy: learning curves and development based on 413  
12 consecutive cases in four centers. *Transplantation*. Feb 27;91(4):462-9.  
13  
14  
15  
16  
17  
18  
19  
20  
21  
22  
23  
24  
25  
26  
27  
28  
29  
30  
31  
32  
33  
34  
35  
36  
37  
38  
39  
40  
41  
42  
43  
44  
45  
46  
47  
48  
49  
50  
51  
52  
53  
54  
55  
56  
57  
58  
59  
60

For peer review only

### Competing interests

The authors declare that they have no competing interests.

### Authors' contributions

Professor Thiel was involved in the conception and design of the study, drafted the protocol, supervised the revisions and approved the final manuscript. Dr Tsinalis was involved in conception and design of this study, revised the draft critically for intellectual content and approved the final revised manuscript. Ms Nolte was involved in the conception of the study, revised the draft critically for intellectual content and approved the final manuscript.

### Acknowledgments

We are indebted to the medical / surgical team and the transplant coordinators of the Transplant Centres of Basel, Bern, Geneva, Lausanne, St. Gallen and Zürich. We would like to thank Ruth Lützel Schwab and Christina Wolf-Heidegger for secretarial help. Also, we are grateful to Thomas Voegelé (Transplant coordinator) for his initial participation, when SOL-DHR was started (1993) and to Hanspeter Hort (graphic artist) for designing the SOL-DHR logo for free. We thank Guy Kollwelter and Heinz Herrmann (both from Astellas) for providing us with medals and individual diplomas for living donors. We would like to thank Dr. Lucas M. Bachmann for administrative work related to the submission of this paper.

We are indebted to Dr. Catherine M. Clase from Mc Master University for her thoughtful suggestions to improve the text and the language editing support.

This study receives funding from various sponsors (see below). The funding bodies had no role in study design, in the collection, analysis and interpretation of data in the writing of the manuscripts or in the decision to submit the manuscript for publication.

**Main Sponsors:**

Viollier AG, Novartis Pharma Schweiz AG, Alfred and Erika Baer-Spycher-Stiftung, Astellas  
Pharma AG, Fresenius Medical care (Switzerland) AG, Roche Pharma (Switzerland) AG

**Regular Sponsors:**

AMGEN (Switzerland) AG, Fresenius Biotech GmbH, Wyeth Pharmaceuticals AG, Spirig  
Pharma AG, diverse private Sponsors

**Other Sponsors:**

Schweizerische Gesellschaft für Nephrologie SGN, Bundesamt für Gesundheit, HP Hort,  
Pfizer AG, Sanofi-Aventis (Switzerland) AG, Genzyme GmbH, H.U. Böhi, P. Roth Yin Yee,  
Oliver Boidol, B. Braun Medical AG, Schweizer Nierenliga, Gambro Hospal (Switzerland)  
AG, Baxter AG.



1  
2  
3 **Prospective Swiss cohort study of living-kidney donors - Study protocol**  
4  
5  
6

7 Gilbert T. Thiel<sup>1</sup> \*, Christa Nolte<sup>1</sup>, Dimitrios Tsinalis<sup>2</sup>  
8

9  
10 [1]

11  
12 SOL-DHR (Swiss Organ Living Donor Health Registry)  
13

14 At the Division of Transplant Immunology and Nephrology in the  
15  
16 University Hospital of Basel, Switzerland  
17

18  
19 [2]

20  
21 SOL-DHR (Division of Nephrology),  
22  
23 Kantonsspital St. Gallen, Switzerland)  
24  
25  
26  
27

28 **\* Corresponding Author**  
29

30 Professor Gilbert T. Thiel, University Hospital of Basel, SOL-DHR auf der Klinik Abteilung  
31  
32 Transplantationsimmunologie und Nephrologie, Petersgraben 4, Basel, 4056 Switzerland  
33  
34  
35  
36

37 **e-mail Addresses:**  
38

39 Gilbert T. Thiel: gil.thiel@unibas.ch  
40

41 Christa Nolte: cnolte@uhbs.ch  
42

43  
44 Dimitrios Tsinalis: dimitrios.tsinalis@kssg.ch  
45  
46  
47  
48  
49  
50  
51  
52  
53  
54  
55  
56  
57  
58  
59  
60

**ABSTRACT**

*Background* Offering living kidney donation raised the concern that donors are exposed to unknown risks. All Swiss transplant centres therefore decided to start a prospective cohort study of living kidney donors in Switzerland. This paper describes the rationale for and implentation of this cohort study.

Deleted: set-up

*Methods/Design* All kidney donors in Switzerland are registered and examined before donation and biennially after donation starting in the first year after nephrectomy. Before each follow-up visit, the study centre sends a package to the kidney donor containing the health questionnaire, blood and urine tubes and a pre-paid envelope for sending the samples to the central laboratory. The donor makes an appointment with his family physician, who examines the donor and reports findings such as pain and other complains, blood pressure, creatinine, albumin and all major health events and the state of mental and social well-being to the study centre. The family doctor draws the blood sample and mails it with the urine sample in the pre-paid envelope. All data are centrally managed. All abnormal findings in the follow-up of

Deleted: In the lead-up of

Deleted: a

Deleted: little parcel

individual donors are regularly discussed with the principal investigator and necessary clinical changes made, and recorded in the database. The health insurance of the recipient covers all costs of the donor follow up. Main outcomes are the occurrence of albuminuria, hypertension and renal insufficiency. Secondary outcomes are major somatic and social events such as death, cardiovascular disease, stroke and depression.

Deleted: principle

Deleted: all

Deleted: measures are taken

Deleted: . Any intervention is stored

Deleted: -

Deleted: organ-

Deleted: -

Deleted: -

*Discussion* This prospective cohort offers unique opportunities to assess the risks of living kidney donation and will allow us to examine, the risks associated with the methods used for nephrectomy in Switzerland (various forms of open surgery and laparoscopic nephrectomy). The prospective collection of all clinically-relevant data and the regular monitoring of donors will allow timely interventions at early stages before serious kidney general health problems occur.

Deleted: assessing

Deleted: allows

Deleted: examining

Deleted: differences for

Deleted: all available

Deleted: endoscopic

Deleted: Moreover, t

Deleted: clinically

Deleted: participants

Deleted: on a regular basis allow

Deleted: an

Deleted: critical parameters of

Deleted: function or

## BACKGROUND

Living kidney donors have been used in Switzerland since 1967 but at a low rate. This, however, changed in the early nineties. Rapid expansion of live kidney transplantation took place especially in the large transplant centre in Basel that had for the two previous decades rejected live donation on ethical grounds. The increase in live donor transplantation was not universally regarded as a benefit. A lawyer wrote in the Swiss Medical Journal that “organ removal from a living person for transplantation is an intended bodily injury according to civil and criminal law”<sup>1</sup>. Concerns were raised over the safety of live organ donation for the donors. The available published data from retrospective studies were largely incomplete. In these studies the percent of donors without follow up data ranged from 21%<sup>2,3</sup> to 31%<sup>4</sup>, to 42%<sup>5,6</sup> up to 77%<sup>7</sup>. Indeed, given the available evidence, fair counselling of potential living donors is challenging.

Since living donor transplantation was mainly propagated by the Basel transplant centre, we felt obliged to offer a long-time follow up of the health state of living organ donors for all Swiss transplant centres. This idea was well accepted by the other five Swiss centres (Bern, Geneva, Lausanne, St. Gallen and Zürich) and consequently, the cohort study by the name of SOL-DHR (Swiss Organ Living Donor Health Registry) was initiated in April 1993.

This paper describes the rationale for and implementation of this prospective cohort study. We aim to assess the prevalence of complications of living kidney donation and to identify risk profiles associated with unfavourable outcomes. We will assess the results of different surgical options for donation. In particular, the study is designed to prospectively quantify the risks to donors after living kidney donation; the development of hypertension, albuminuria, renal failure and psychological diseases. The infrastructure will also assist in the management of individual donors at an early stage if such complications occur.

Deleted: were

Deleted: one

Deleted: Swiss

Deleted: , where live kidney was formerly strictly disapproved

Deleted: over two

Deleted: because of ethical reasons

Deleted: But t

Deleted: rising number of

Deleted: well accepted from all sides

Deleted: G

Deleted: any

Deleted: very difficult

Deleted: -

Deleted: and

Deleted: set-up

Deleted: aiming at assessing

Deleted: aiming at identifying

Deleted: such as

Deleted: and to

**METHODS**

Deleted: / DESIGN

Prospective cohort study: There was an a priori consensus among the founding members that health state of all consenting eligible living kidney donors should be assessed life-long at regular time intervals in the context of a prospective cohort study. The protocol and the questionnaires were approved by the Ethical Committee of the University Hospital of Basel and the Swiss Academy of Medical Science (SAMW). No informed consent is required as lifelong follow-up of living donor's health state is required by the Swiss Transplant Law and may be studied, as long as data are analysed anonymously. However, to assure compliance to the long-term follow-up protocol, donors are informed about the aims of the protocol and the registry before their donation. In addition, kidney donors have at any time after donation the option to stop participating by simply ignoring the invitation from SOL-DHR to visit their family physician.

Deleted: -

Deleted: long

Deleted: follow

Deleted: quit their participation

Donors from all six kidney transplant centres have been included in the SOL-DHR since 1993. Until the end of 2010 a total of 1332 living kidney donors have been included (Basel n = 521, Berne n = 119, Geneva n = 111, Lausanne n = 151, St Gallen n = 79 and Zurich n = 360).

Deleted: are

Deleted: which started

Deleted:

Deleted: .

**Main objectives**

- Obtain prospective outcome data from consecutive living kidney donors in Switzerland
- Quantify the risks for early and late complications due to nephrectomy
- Improve the information given to future potential donors before agreeing to donate a kidney and to produce standardized evidence based educational materials

Deleted: Gaining

Deleted: Assess and q

Deleted: organ removal

- 1
  - 2
  - 3
  - 4
  - 5
  - 6
  - 7
  - 8
  - 9
  - 10
  - 11
  - 12
  - 13
  - 14
  - 15
  - 16
  - 17
  - 18
  - 19
  - 20
  - 21
  - 22
  - 23
  - 24
  - 25
  - 26
  - 27
  - 28
  - 29
  - 30
  - 31
  - 32
  - 33
  - 34
  - 35
  - 36
  - 37
  - 38
  - 39
  - 40
  - 41
  - 42
  - 43
  - 44
  - 45
  - 46
  - 47
  - 48
  - 49
  - 50
  - 51
  - 52
  - 53
  - 54
  - 55
  - 56
  - 57
  - 58
  - 59
  - 60
- Install a system of timely intervention in case of development of markers of increased risk or new health problems
  - Compare outcomes from different methods of nephrectomy
  - Provide a neutral platform for donors to express complaints and receive help

**Deleted:** <#>Improve the information given to potential donors before agreeing to donate a kidney

**Deleted:** deterioration in state of health

**Deleted:** the consequences of

**Deleted:** organ removal on state of health

**Deleted:** , where

**Deleted:** can

## Data collection principles

Before kidney donation, the transplant centre is responsible for including patients in the study

and for the first medical examination before kidney donation (see basic medical questionnaire

below). At the time of discharge after nephrectomy, the transplant centre submits a second

questionnaire (the early complications questionnaire). Thereafter the SOL-DHR centre

organises a lifelong follow-up after nephrectomy at 1 year, 3 years, 5 years, 7 years, 10 years

and biennially thereafter. The kidney donors are examined by their family physicians in the

vicinity where they live. Before each follow up visit, the SOL-DHR centre sends a package to

the kidney donor asking the donor to make an appointment with the present family physician

of his or her choice. This contains the brief information for the donor and the family

physician, a health questionnaire, tubes for blood and urine samples and a pre-paid envelope

for sending the samples at room temperature to the central laboratory (Viollier AG Basel).

The basic biannual follow-up questionnaire is filled in by the family physician. Every 5 years

the donor fills in the additional SF8 and social status questionnaire (see below).

If no response from the donor is received within 2 months after the follow-up material was

sent out, SOL-DHR initiates a search for the donor, contacting the recipient, the donor's

health insurance and the public registries to identify whether the donor has died and if so, the

cause of death.

**Deleted:** Study inclusion and a

**Deleted:** is done by the transplant centre

**Deleted:** A

**Deleted:** is collected from the transplant centre at the time of discharge after nephrectomy

**Deleted:** -

**Deleted:** In the lead-up of a

**Deleted:** -

**Deleted:** little parcel

**Deleted:** e parcel

**Deleted:** follow

**Deleted:** scheduled biannual send out of the follow-up material

**Deleted:** and to collect possible data on donor death and its reason by

Results from the blood and urine analysis by the central laboratory are sent to the family physician and to the cohort manager [at SOL-DHR](#).

### Participation of family physicians

Whereas kidney recipients live usually in the area of the transplant centre, kidney donors often do not. [Donors are not likely to adhere to a recommendation](#), to travel lifelong biannually to [a distant transplant centre for follow up](#), particularly since travel expenses are not covered. [We believe that adherence will be much greater if follow up can be coordinated by the patients own local family physician](#), Family physicians, [aided by trainees](#) at the transplant centre follow the protocols provided by the study centre.

Deleted: Asking donors

Deleted: the

Deleted: control has little chance to be followed

Deleted: Follow-up controls done by the

Deleted: working in the vicinity of the donor improve donor's willingness to participate manifold

Deleted: as well as young

Deleted: medical assistants

### Collected data

#### Laboratory data

We [analyze](#) creatinine in blood and urine, albumin and protein in urine [centrally](#). The method used to quantify [creatinine](#) in blood changed over the years: 1993 -1996 Jaffee, 1997 -2003 enzymatic assay (Roche), 2004 – 2005 “Jaffe compensated” (Roche), 2006 – [August 2007](#) “Jaffe corrected” (Siemens), [and since September 2007 an enzymatic assay](#) (Siemens). In order to avoid systematic errors due to different assays prior to the data base entry all values are converted to values traceable to isotope dilution mass spectrometry (IDMS) as recommended by the KDIGO consensus conference<sup>8</sup> using calibration data supplied by the assay's manufacturers (data available on request). Albumin in urine is measured by turbidimetry after antigen-antibody reaction using the endpoint method (Roche Diagnostics).

Deleted: quantify

Deleted: Creatinine

Deleted: . S

Whenever during a follow up a laboratory results (creatinine or albumin/creatinine ratio) exceeds the expected range in an individual donor, the sampling and the laboratory analysis is repeated.

Deleted: -

## Definitions

### Estimation of the glomerular filtration rate (GFR)

To estimate GFR, we use the MDRD equation for IDMS-traceable creatinine values<sup>9</sup>

eGFR (mL/min/1.73 m<sup>2</sup>) =

$$175 \times (\text{Scr}/88.4)^{-1.154} \times (\text{Age})^{-0.203} \times (0.742^*) \times (1.212^+) * \text{ If female + If African}$$

### Micro-albuminuria (= high albumin excretion)

We assume a daily urinary excretion of 10 mmol creatinine/day as being normal for donors

(using this mean value for both genders taken together; an underestimate for males, and an overestimate for females). We will report albuminuria as albumin:creatinine ratios using the cut-points defined by the report of the scientific workshop sponsored by the National Kidney

Foundation and the US Food and Drug Administration.<sup>10</sup> The cut-point for microalbuminuria

or high albumin excretion is > 30 mg/g (> 3.3 mg/mmol). For clarity reasons we will use the

term microalbuminuria which is commonly used in Europe rather than the term “high albumin

excretion” used in North America. The cut-point for macroalbuminuria or very high albumin

excretion is >300 mg/g (> 33.9 mg/mmol).

### Hypertension

Donors who have a systolic pressure above 140 mm Hg or diastolic above 90 mmHg or both

or who are taking any antihypertensive drug are classified as hypertensive. In any case of new

onset hypertension, we ask the family physician to perform a 24-hour ambulatory blood

pressure recording. If hypertension is confirmed, we recommend antihypertensive treatment

with and ACE inhibitor or an angiotensin receptor blocker.

Deleted: Creatinin

Deleted: 24h

Deleted: , -

Deleted: ing it

Deleted: overestimating

Deleted: Data on

Deleted: will be presented based on

Deleted: -off

Deleted: off-

Deleted: albumin excretion to be called

Deleted: -

Deleted: set to

Deleted: albumine / g creatinine

Deleted: corresponding to

Deleted: albumin / mmol creatinine

Deleted: -

Deleted: For t

Deleted: he definition of

Deleted: -

Deleted: e

Deleted: at cut-off point of

Deleted: albumin / g creatinine

Deleted: corresponding to

Deleted: albumin / mmol creatinine is

Deleted: used

Deleted: having

Deleted: ACEI

Deleted: Angiotensin

Deleted: antagonist

Deleted: (ARA)

**Health status data**

At each visit, the family physician is asked to measure the actual weight, height and blood pressure (3 times in sitting position), and the bare abdomen of the donor in an upright posture to look for an incisional hernia or abdominal wall bulging caused by the nephrectomy. When the donor is complaining about pain at any specific place (eg. lumbar back pain), it should be examined and evaluated, whether it is or could be causally related to nephrectomy. We ask for careful documentation of new symptoms, comorbidities or other problems (somatic, mental, social).

Deleted: state

Deleted: . Moreover he is requested to examine

Deleted: in order

Deleted: i.e.

Deleted: New

Deleted: complains

Deleted: , disease or any

Deleted: need to be mentioned carefully in a separate line of the form

*Questionnaires*

- The basic medical questionnaire to be collected before donation:

The basic medical questionnaire collects information on body weight, sitting blood pressure (3 times), description of the nephrectomy scare, pain or new problems since the last examination and an inventory of all drugs currently taken. The questionnaire before donation also includes “major disease and back pain”, since we realize that back pain is such a common complaint that we need information before donation in order to classify back pain after donation in a meaningful way.

- Early complication questionnaire to be collected at the time of hospital discharge after nephrectomy (since 1998):

This questionnaire collects data on the side and method used for nephrectomy and all complications occurring peri- and post-operatively including blood transfusions, whether the endoscopic procedure had to be changed intraoperatively and whether surgical revision was necessary. Early postoperative pain, which reflects pain at the site of incision and sometimes in case of endoscopic nephrectomy additional shoulder

Deleted: is collecting

Deleted: -



1  
2 pain do to body positioning during surgery, is assessed using the visual analogue  
3  
4 scale. The questionnaire is filled out usually 2 weeks after nephrectomy. For grading  
5  
6 early complications we use the Clavien scale<sup>11</sup>. Every early complication observed in  
7  
8 a donor is classified along the Clavien scale (Grade I= 1, grade II= 2, grade IIIa= 3,  
9  
10 grade IIIb= 3.5, grade Iva= 4, grade IVb= 4.5 etc.). If multiple complications occur  
11  
12 in the same donor, the single Clavien scores are added to what is called the Clavien  
13  
14 sum per donor score. We also calculate the simple sum of observed complications per  
15  
16 donor. The two sums have different interpretations. For a given group of donors, eg.  
17  
18 older than 60 years, the mean simple sum of complications shows the frequency of  
19  
20 early complications seen in elderly donors, whereas the mean Clavien sum shows their  
21  
22 severity.

Deleted: -

Deleted: Scale

Deleted: 1

Deleted: -

Deleted: Sum

Deleted: as compared to

Deleted: score

Deleted: (sub) population

Deleted: i.e.

Deleted: "

Deleted: "

Deleted: " however,

- 23  
24 - The basic biannual follow up questionnaire

25  
26 We ask the family physician to measure body weight, sitting blood pressure (3 times),  
27  
28 examine the nephrectomy scar and to take an interim medical history in order to  
29  
30 complete the medical questionnaire. This includes questions about pain and all serious  
31  
32 health problems (eg. stroke, cardiovascular events, diabetes or malignancies) since the  
33  
34 last examination. Back pain is considered to be related to the nephrectomy, only if  
35  
36 specified by the donor or his physician as being clearly more intense than before  
37  
38 donation. (Pain related to nephrectomy can be caused by instability of the abdominal  
39  
40 wall after large lumbar incision with partial muscular palsy.) The family physician  
41  
42 records all drugs currently taken; performs a bedside dipstick examination of the urine  
43  
44 and fills blood and urine vials and send both vials to the central laboratory. If the  
45  
46 urinary dipstick turns out to be positive for blood, protein, white blood cells or other  
47  
48 abnormalities, we request that the family doctor make an additional microscopic  
49  
50 examination of the urinary sediment. All clinical data are sent to the SOL-DHR study  
51  
52 centre.

Deleted: T

Deleted: is requested

Deleted: e

Deleted: ask the donor all questions necessary to file-out the

Deleted: including

Deleted: including major events such as

Deleted: -

Deleted: as

Deleted: related

Deleted: iv

Deleted: as

Deleted: pain

Deleted: Furthermore t

Deleted: is asked to note

Deleted: make

Deleted: -

Deleted: finally

Deleted: a

Deleted: a

Deleted: tube

Deleted: tubes

Deleted:

Deleted: and

Deleted: the doctor has to

Deleted: , including the health state questionnaire,

Deleted: SOL-DHR

- The SF-8 questionnaire has been collected every 5 years after donation since 2002. The validated SF-8 multiple choice questionnaire is used to calculate the Physical Component Summary (PCS) and the Mental Component Summary (MCS). We ask three supplementary multiple choice questions, which are analysed separately: 1) In comparison to one year ago how would you describe your actual health? 2) How has your emotional relationship with the kidney recipient changed since donation? 3) Would you donate a kidney again, if you still had two kidneys?

- Deleted: to be
- Deleted: (
- Deleted: )
- Deleted: .
- Deleted: was
- Deleted: The questionnaire was supplemented by the three following
- Deleted: the last year
- Deleted: to
- Deleted: . The answers to these questions are analysed separately from the 8 SF-8 questions.
- Deleted: (since 2002).

- Social status questionnaire. Since 2002 we have used an instrument developed by SOL-DHR that contains multiple choice questions about the actual professional activity, working capacity, efficiency, and physical fitness of the donor, along with two open questions: 1) draw backs because of donation (eg. financial, insurance, pension fund or professional disadvantages) and 2) donor's suggestions for possible improvement for SOL-DHR activities (What can SOL-DHR do better for you?)

- Deleted: This instrument has been
- Deleted: and
- Deleted: and
- Deleted: e.g.
- Deleted: on
- Deleted: the
- Deleted: activity

**Data monitoring and quality assurance**

All incoming data are checked by staff for completeness and plausibility, and are entered into an electronic database. In case of missing or implausible data, we call the office of the family physician and attempt to rectify this. Once or twice a month staff discuss any donor with an abnormality with the principal investigator. Urgent cases are discussed immediately and interventions are initiated without delay. All outcomes are stored within the database. The "principle of intervention" is a key feature of this cohort study. Thus, we do not only observe our cohort, but we also intervene actively, as soon as any risk factor changes or clinical problem develops. Study leaders make recommendations for interventions which are then implemented by the family physician. Recommendations may include performing a

- Deleted: cohort
- Deleted: thereafter
- Deleted: lacking
- Deleted: information
- Deleted: staff calls to
- Deleted: and tries to receive any missing data
- Deleted: All cases with
- Deleted: are discussed
- Deleted: principle
- Deleted: once or twice a month
- Deleted: potential danger is turning up
- Deleted: I
- Deleted: are planned to be provided by the
- Deleted: based on the recommendation of the study leaders

1  
2 diagnostic procedure like the 24-hour ambulatory blood pressure measurement in order to  
3  
4 confirm hypertension, to perform an ultrasound of the remaining kidney or to repeat the  
5  
6 chemical analysis. The letter may also contain a recommendation for treatment.  
7  
8  
9

Deleted: -

Deleted: or to

Deleted: sonography

Deleted: simply

## 10 Funding of SOL-DHR and reimbursement for follow-up examinations

Deleted: Reimbursement

11  
12 The SOL-DHR expenses are funded by the Swiss Foundation for the follow-up care of living  
13  
14 organ donors (SNO). The SNO is supported by the government, research and industry funds  
15  
16 as well as the Swiss Society of Nephrology. The detailed list of sponsors is given at the end of  
17  
18 the manuscript. The running costs of SOL-DHR are kept low as organisation and medical  
19  
20 activities of SOL-DHR are provided on a volunteer basis by G.T. since 1993 and D.T. since  
21  
22 2000.  
23  
24

Deleted: base

Deleted:

25 The basic concept is to cover the costs of kidney donor follow-up via the insurance company  
26  
27 of the kidney recipient, because they would have paid ongoing dialysis costs had no living  
28  
29 donation taken place. Coverage includes all costs including those of late complications of the  
30  
31 donor that are causally related to the donation. Hence, Swiss transplant law requires the health  
32  
33 insurance of the kidney recipients to cover the bills from the family physicians for biannual  
34  
35 donor follow-up (according to a fixed payment schedule) as long as the recipient is alive.  
36  
37 After the recipients' death the bills for the donor follow-up are covered by SNO. The bills for  
38  
39 donor follow-up examination are sent to the SOL-DHR centre, which forwards the bill to the  
40  
41 health insurance of the kidney recipient. The costs for the chemical analysis in blood and  
42  
43 urine of donors are covered by the Violliers AG Basel since 1993. Cost for drugs required by  
44  
45 the donor are paid by the compulsory health insurance of the donor, whether the drug  
46  
47 treatment is related to donation or not.  
48  
49  
50  
51

Deleted: -

Deleted: to pay

Deleted: the

Deleted: if

Deleted: had

Deleted: the

Deleted: s

Deleted: -

Deleted: stays

Deleted: with an official pay scale

Deleted: -

Deleted: the

Deleted: -

Deleted: headquarter

Deleted: independently

## 52 Handling missing responses

If no response is received by 2 months after an invitation has been sent (neither a filled out questionnaire from the donor nor the family physician or laboratory) SOL-DHR staff call the donor. If the donor declines to participate further, he or she will be marked “inactive” in the cohort database and follow up is suspended. If the donor later changes his or her mind, and gets in touch with us again (eg. after moving back to Switzerland) the status is changed back to “active” immediately.

- Deleted: within 2 months
- Deleted: s
- Deleted: declares, that he does not longer want to
- Deleted: -
- Deleted: , however,
- Deleted: i.e.
- Deleted: at any time

### Control population

To control for the risk of developing hypertension we plan using two different reference groups. First, we will compare the incidence and prevalence of hypertension in our cohort with that of the MONICA study (data from a normal Swiss population).<sup>12-14</sup> Second, since living donors are positively selected from the normal population we consider them to be “healthier” than the normal population resulting in a potential underreporting of health risks.

- Deleted: frequency of occurrence
- Deleted: to
- Deleted: -
- Deleted: with
- Deleted: a positive selection out of

To directly compare the normal outcome of such a healthy cohort, pooled data from the SOL-DHR’s own healthy donor population taken prior to nephrectomy (n=1332) is used to analyse the outcome of this positively-selected donor population after donation.

- Deleted: positively

### Statistical considerations

Continuous data will be presented with medians, interquartile ranges or means and standard deviations as appropriate and categorical data as rates and percentages. The association of independent variables with the outcome variables will be reported using correlation coefficients. Main outcomes are the occurrence of albuminuria, hypertension and renal insufficiency as specified above. Secondary outcomes are major somatic and social events such as death, cardiovascular disease, stroke and depression collected from the questionnaires. All outcomes are considered to be dichotomous.

- Deleted: Considerations
- Deleted: Epidemiologic data and patients' descriptives available on continuous scales
- Deleted: . C
- Deleted: will be presented
- Deleted: Association
- Deleted: individual (
- Deleted: )
- Deleted: on

1  
2 Results from univariate analysis will inform multivariable modelling. Assessment of causal  
3 associations will be performed using multivariable models including potential confounders  
4 along with the independent variables of interest. Prognostic scores will be built using either  
5 multivariate logistic regression analysis or Cox proportional hazard models. Models will be  
6 validated in cross samples. Calibration and discrimination of the cross-validated prognostic  
7 instruments will be assessed using the Brier Score. Time series analysis will be performed  
8 using random-effects regression models where appropriate.

Deleted: multivariate

Deleted: multivariate

9  
10  
11  
12  
13  
14  
15 Sample size calculations

Deleted: -S

Deleted: random

Deleted: Size

Deleted: Calculations

16  
17  
18 The analysis is based on the example of hypertension: We assume that 1 additional kidney  
19 donor out of 15 (controls) will develop hypertension. We further assume a follow up after the  
20 accrual interval of 10 years. Prior data indicate that the median survival time on the control  
21 treatment is 5 years. If the true median survival times on the control and experimental  
22 treatments are 5 and 10 years, respectively, we will need to study 29 subjects developing  
23 hypertension and 435 control subjects to be able to reject the null hypothesis that the  
24 experimental (post surgery) and control (pre-surgery) survival curves are equal with  
25 probability (power) 80%. The Type I error probability associated with this test of this null  
26 hypothesis is 0.05.

Deleted: -

**Discussion**

This paper describes the rationale for and organization of a lifelong prospective cohort study of living kidney donors in Switzerland. This study offers unique opportunities to assess the frequency of occurrence of unfavourable outcomes following donation and allows determining risk factors associated to them. More specifically, we are particularly interested in increasing our understanding of the long term effect of donation on renal function, the risk of developing hypertension or albuminuria and exploring whether adverse outcomes depend on the method of nephrectomy applied. Moreover, the systematic collection of all clinically relevant data and the monitoring of participants on a regular basis allow timely interventions if kidney function or general health change for the worse.

Deleted: set-up

Deleted: assessing

Deleted: to develop

Deleted: to explore

Deleted: critical parameters of

An overview of the existing evidence

In the eighties and early nineties many interesting papers were already available<sup>2-7 15-23</sup>. They all tried to quantify the morbidity and mortality of living kidney donation or unilateral nephrectomy. Most data derive from single centres in the USA, some from Norway or Australia. Unfortunately all published data were collected retrospectively resulting in incomplete data sets, and the data are affected by selection bias. Based on these retrospective studies kidney donation is now generally accepted as a relatively safe procedure but long-term data prospective studies of consecutive patients are lacking<sup>24-27</sup>.

Deleted: prone

Deleted: to

Deleted: that are still quite incomplete

Up to now prospective long-term follow-up of living donors has not been regarded generally as a necessity. Prospective long-term follow-up study of living donors as set out in the present protocol is not only likely to improve the quality of the data on the short- and medium-term safety of living kidney donation, but also allows for timely intervention if an individual donor

Deleted: The advantage of a p

Deleted: sets regarding

Deleted:

Deleted: also

Deleted: a

experiences a potential problem. Data generated will inform policy on optimal long-term donor follow-up.

**Deleted:** This

**Deleted:** provide important data to clarify the

**Deleted:** potential need and requirements of

In addition, new questions such as the effect of various surgical techniques have arisen recently. Several methods of endoscopic (including robotic assisted) nephrectomy have been introduced and have been shown to be relatively safe<sup>28-38</sup>. Single centre reports mainly concentrate on a single technology rather than providing unbiased comparisons of different methods<sup>30 33-36</sup>. To our knowledge, no national prospective cohorts have yet reported on these issues and those that are planned will compare only two methods<sup>32</sup>.

**Deleted:** are

**Deleted:** defending their own used

**Deleted:** Bottom line however,

**Deleted:** countrywide prospective cohorts allowing a comparison of various surgical procedures are yet unavailable or in an early phase comparing no more than two methods

The question of whether kidney donation increases the risk for hypertension, which was already debated in the eighties<sup>4 16 22</sup>, is still unsettled due to limited studies<sup>29</sup>. We think that the results of this large national wide prospective cohort study will address many important unanswered questions about outcomes in living kidney donors.

**Deleted:** on debate

**Deleted:** answer

**Deleted:** still open

**Deleted:** concerning

**Deleted:** outcome

- 1 1. Butz K. Organ transplantation from the lawyer's viewpoint. Schw Ärztezeitschrift. 1987;68:1826-9.
- 2
- 3
- 4 2. Dunn JF, Nylander WA, Jr., Richie RE, et al. Living related kidney donors. A 14-year  
5 experience. Ann Surg. 1986 Jun;203(6):637-43.
- 6
- 7 3. Westlie L, Fauchald P, Talseth T, et al. Quality of life in Norwegian kidney donors.  
8 Nephrol Dial Transplant. 1993;8(10):1146-50.
- 9
- 10 4. Torres VE, Offord KP, Anderson CF, et al. Blood pressure determinants in living-  
11 related renal allograft donors and their recipients. Kidney Int. 1987 Jun;31(6):1383-90.
- 12
- 13 5. Najarian JS, Chavers BM, McHugh LE, et al. 20 years or more of follow-up of living  
14 kidney donors. Lancet. 1992 Oct 3;340(8823):807-10.
- 15
- 16 6. Smith MD, Kappell DF, Province MA, et al. Living-related kidney donors: a  
17 multicenter study of donor education, socioeconomic adjustment, and rehabilitation. Am J  
18 Kidney Dis. 1986 Oct;8(4):223-33.
- 19 7. Miller IJ, Suthanthiran M, Riggio RR, et al. Impact of renal donation. Long-term  
20 clinical and biochemical follow-up of living donors in a single center. Am J Med. 1985  
21 Aug;79(2):201-8.
- 22 8. Levey AS, Eckardt KU, Tsukamoto Y, et al. Definition and classification of chronic  
23 kidney disease: a position statement from Kidney Disease: Improving Global Outcomes  
24 (KDIGO). Kidney Int. 2005 Jun;67(6):2089-100.
- 25 9. Levey AS, Coresh J, Greene T, et al. Expressing the Modification of Diet in Renal  
26 Disease Study equation for estimating glomerular filtration rate with standardized serum  
27 creatinine values. Clin Chem. 2007 Apr;53(4):766-72.
- 28 10. Levey AS, Cattran D, Friedman A, et al. Proteinuria as a surrogate outcome in CKD:  
29 report of a scientific workshop sponsored by the National Kidney Foundation and the US  
30 Food and Drug Administration. Am J Kidney Dis. 2009 Aug;54(2):205-26.
- 31 11. Dindo D, Demartines N, Clavien PA. Classification of surgical complications: a new  
32 proposal with evaluation in a cohort of 6336 patients and results of a survey. Ann Surg. 2004  
33 Aug;240(2):205-13.
- 34 12. Wietlisbach V: Personal Communication (comparative data from MONICA to SOL-  
35 DHR using the same definition of hypertension) in Fehrman-Ekholm and Thiel G.: Longterm  
36 risks after living kidney donation 2005 p 99-112 (Figure 7-6); Living Donor Kidney  
37 Transplantation; edited by Gaston R.S. and Wadström J (Taylor & Francis; London and New  
38 York;2005)
- 39 13. Wietlisbach V, Barazzoni F. [Outcome and analysis of participation in the 2d  
40 MONICA survey (1988-1989) of cardiovascular risk factors]. Schweiz Med Wochenschr  
41 Suppl. 1993;48:13-20.
- 42 14. Wietlisbach V, Paccaud F, Rickenbach M, et al. Trends in cardiovascular risk factors  
43 (1984-1993) in a Swiss region: results of three population surveys. Prev Med. 1997 Jul-  
44 Aug;26(4):523-33.
- 45 15. Bay WH, Hebert LA. The living donor in kidney transplantation. Ann Intern Med.  
46 1987 May;106(5):719-27.
- 47 16. Hakim RM, Goldszer RC, Brenner BM. Hypertension and proteinuria: long-term  
48 sequelae of uninephrectomy in humans. Kidney Int. 1984 Jun;25(6):930-6.
- 49
- 50
- 51
- 52
- 53
- 54
- 55
- 56
- 57
- 58
- 59
- 60



17. [Levey AS, Hou S, Bush HL, Jr. Kidney transplantation from unrelated living donors. Time to reclaim a discarded opportunity. N Engl J Med. 1986 Apr 3;314\(14\):914-6.](#)
18. [Morris P, St George B, Waring T, et al. Psychosocial complications in living related kidney donors: an Australian experience. Transplant Proc. 1987 Apr;19\(2\):2840-4.](#)
19. [Narkun-Burgess DM, Nolan CR, Norman JE, et al. Forty-five year follow-up after uninephrectomy. Kidney Int. 1993 May;43\(5\):1110-5.](#)
20. [Penn I, Halgrimson CG, Ogden D, et al. Use of living donors in kidney transplantation in man. Arch Surg. 1970 Aug;101\(2\):226-31.](#)
21. [Spital A. Living kidney donation: still worth the risk. Transplant Proc. 1988 Oct;20\(5\):1051-8.](#)
22. [Talseth T, Fauchald P, Skrede S, et al. Long-term blood pressure and renal function in kidney donors. Kidney Int. 1986 May;29\(5\):1072-6.](#)
23. [Weiland D, Sutherland ER, Chavers BM, et al. Information of 628 Living-related Kidney donors at a single institution, with long-term follow-up in 472 cases. Transplant Proc. 1984;16:5-7.](#)
24. [Clemens K, Boudville N, Dew MA, et al. The Long-Term Quality of Life of Living Kidney Donors: A Multicenter Cohort Study. Am J Transplant. Mar;11\(3\):463-9.](#)
25. [Fehrman-Ekholm I, Elinder CG, Stenbeck M, et al. Kidney donors live longer. Transplantation. 1997 Oct 15;64\(7\):976-8.](#)
26. [Ibrahim HN, Foley R, Tan L, et al. Long-term consequences of kidney donation. N Engl J Med. 2009 Jan 29;360\(5\):459-69.](#)
27. [Tan JC, Chertow GM. Cautious optimism concerning long-term safety of kidney donation. N Engl J Med. 2009 Jan 29;360\(5\):522-3.](#)
28. [Bachmann A, Wolff T, Ruzsat R, et al. Retroperitoneoscopic donor nephrectomy: a retrospective, non-randomized comparison of early complications, donor and recipient outcome with the standard open approach. Eur Urol. 2005 Jul;48\(1\):90-6; discussion 6.](#)
29. [Boudville N, Prasad GV, Knoll G, et al. Meta-analysis: risk for hypertension in living kidney donors. Ann Intern Med. 2006 Aug 1;145\(3\):185-96.](#)
30. [Capolicchio JP, Saemi A, Trotter S, et al. Retroperitoneoscopic Nephrectomy With a Modified Hand-assisted Approach. Urology. Mar;77\(3\):607-11.](#)
31. [Dols LF, Kok NF, Ijzermans JN. Live donor nephrectomy: a review of evidence for surgical techniques. Transpl Int. Feb;23\(2\):121-30.](#)
32. [Dols LF, Kok NF, Terkivatan T, et al. Hand-assisted retroperitoneoscopic versus standard laparoscopic donor nephrectomy: HARP-trial. BMC Surg.10:11.](#)
33. [Hoda MR, Greco F, Wagner S, et al. Prospective, nonrandomized comparison between right- and left-sided hand-assisted laparoscopic donor nephrectomy. Transplant Proc. Jan-Feb;43\(1\):353-6.](#)
34. [Jacobs SC, Cho E, Dunkin BJ, et al. Laparoscopic nephrectomy in the markedly obese living renal donor. Urology. 2000 Dec 20;56\(6\):926-9.](#)
35. [Kohei N, Kazuya O, Hirai T, et al. Retroperitoneoscopic living donor nephrectomy: experience of 425 cases at a single center. J Endourol. Nov;24\(11\):1783-7.](#)
36. [Ma L, Ye J, Huang Y, et al. Retroperitoneoscopic live-donor nephrectomy: 5-year single-center experience in China. Int J Urol. Feb;17\(2\):158-62.](#)

37. [Troppmann C, Daily MF, McVicar JP et al. The transition from laparoscopic to retroperitoneoscopic live donor nephrectomy: a matched pair pilot study. \*Transplantation\*. Apr 15;89\(7\):858-63.](#)

38. [Wadstrom J, Biglarnia A, Gjertsen H, et al. Introducing hand-assisted retroperitoneoscopic live donor nephrectomy: learning curves and development based on 413 consecutive cases in four centers. \*Transplantation\*. Feb 27;91\(4\):462-9.](#)

**Deleted:** References¶

- ¶ 1. Butz K. Organ transplantation from the lawyer's viewpoint. *Schw. Ärztezeitung* 1987;68:1826-1829.¶
2. Dunn JF, Nylander WA, Jr., Richie RE, Johnson HK, MacDonell RC, Jr., Sawyers JL. Living related kidney donors. A 14-year experience. *Ann Surg* 1986;203(6):637-43.¶
3. Westlie L, Fauchald P, Talseth T, Jakobsen A, Flatmark A. Quality of life in Norwegian kidney donors. *Nephrol Dial Transplant* 1993;8(10):1146-50.¶
4. Torres VE, Offord KP, Anderson CF, Velosa JA, Frohnert PP, Donadio JV, Jr., et al. Blood pressure determinants in living-related renal allograft donors and their recipients. *Kidney Int* 1987;31(6):1383-90.¶
5. Najarian JS, Chavers BM, McHugh LE, Matas AJ. 20 years or more of follow-up of living kidney donors. *Lancet* 1992;340(8823):807-10.¶
6. Smith MD, Kappell DF, Province MA, Hong BA, Robson AM, Dutton S, et al. Living-related kidney donors: a multicenter study of donor education, socioeconomic adjustment, and rehabilitation. *Am J Kidney Dis* 1986;8(4):223-33.¶
7. Miller JJ, Suthanthiran M, Riggio RR, Williams JJ, Riehle RA, Vaughan ED, et al. Impact of renal donation. Long-term clinical and biochemical follow-up of living donors in a single center. *Am J Med* 1985;79(2):201-8.¶
8. Levey AS, Eckardt KU, Tsukamoto Y, Levin A, Coresh J, Rossert J, et al. Definition and classification of chronic kidney disease: a position statement from Kidney Disease: Improving Global Outcomes (KDIGO). *Kidney Int* 2005;67(6):2089-100.¶
9. Levey AS, Coresh J, Greene T, Marsh J, Stevens LA, Kusek JW, et al. Expressing the Modification of Diet in Renal Disease Study equation for estimating glomerular filtration rate with standardized serum creatinine values. *Clin Chem* 2007;53(4):766-72.¶
10. Levey AS, Catran D, Friedman A, Miller WG, Sedor J, Tuttle K, et al. Proteinuria as a surrogate outcome in CKD: report of a scientific workshop sponsored by the National Kidney Foundation and the US Food and Drug Administration. *Am J Kidney Dis* 2009;54(2):205-26.¶
11. Dindo D, Demartines N, Clavien PA. Classification of surgical complications: a new proposal with evaluation in a cohort of 6336 patients and results of a survey. *Ann Surg* 2004;240(2):205-13.¶
12. Wietlisbach V: Personal Communication (comparative data from MONICA to SOL-DHR using the same definition of hypertension) In: Fehrman-Ekholm and Thiel G.: Longterm risks after living kidney donation 2005 p 99-112 (Figure 7-6). ) In the book: Living Donor Kidney Transplantation; edited by Gaston R.S. and Wadström J (Taylor & Francis; London and New York;2005).¶
13. Wietlisbach V, Barazzoni F. [Outcome and analysis of participation in the 2d MONICA survey (1988-19... [11]

## Competing interests

The authors declare that they have no competing interests.

## Authors' contributions

Professor Thiel was involved in the conception and design of the study, drafted the protocol, supervised the revisions and approved the final manuscript. Dr Tsinalis was involved in conception and design of this study, revised the draft critically for intellectual content and approved the final revised manuscript. Ms Nolte was involved in the conception of the study, revised the draft critically for intellectual content and approved the final manuscript.

Deleted: .

## Acknowledgments

We are indebted to the medical / surgical team and the transplant coordinators of the Transplant Centres of Basel, Bern, Geneva, Lausanne, St. Gallen and Zürich. We would like to thank Ruth Lützelshwab and Christina Wolf-Heidegger for secretarial help. Also, we are grateful to Thomas Voegelé (Transplant coordinator) for his initial participation, when SOL-DHR was started (1993) and to Hanspeter Hort (graphic artist) for designing the SOL-DHR logo for free. We thank Guy Kollwelter and Heinz Herrmann (both from Astellas) for providing us with medals and individual diplomas for living donors.

This study receives funding from various sponsors (see below). The funding bodies had no role in study design, in the collection, analysis and interpretation of data in the writing of the manuscripts or in the decision to submit the manuscript for publication.

Deleted: and

## Main Sponsors:

Viollier AG, Novartis Pharma Schweiz AG, Alfred and Erika Baer-Spycher-Stiftung, Astellas Pharma AG, Fresenius Medical care (Switzerland) AG, Roche Pharma (Switzerland) AG

## Regular Sponsors:

1  
2 AMGEN (Switzerland) AG, Fresenius Biotech GmbH, Wyeth Pharmaceuticals AG, Spirig

3  
4 Pharma AG, diverse private Sponsors

5  
6 **Other Sponsors:**

7  
8 Schweizerische Gesellschaft für Nephrologie SGN, Bundesamt für Gesundheit, HP Hort,

9  
10 Pfizer AG, Sanofi-Aventis (Switzerland) AG, Genzyme GmbH, H.U. Böhi, P. Roth Yin Yee,

11  
12 Oliver Boidol, B. Braun Medical AG, Schweizer Nierenliga, Gambro Hospal (Switzerland)

13  
14 AG, Baxter AG.  
15  
16  
17  
18  
19  
20  
21  
22  
23  
24  
25  
26  
27  
28  
29  
30  
31  
32  
33  
34  
35  
36  
37  
38  
39  
40  
41  
42  
43  
44  
45  
46  
47  
48  
49  
50  
51  
52  
53  
54  
55  
56  
57  
58  
59  
60

## References

1. Butz K. Organ transplantation from the lawyer's viewpoint. *Schw. Ärztezeitschrift* 1987;68:1826-1829.
2. Dunn JF, Nylander WA, Jr., Richie RE, Johnson HK, MacDonell RC, Jr., Sawyers JL. Living related kidney donors. A 14-year experience. *Ann Surg* 1986;203(6):637-43.
3. Westlie L, Fauchald P, Talseth T, Jakobsen A, Flatmark A. Quality of life in Norwegian kidney donors. *Nephrol Dial Transplant* 1993;8(10):1146-50.
4. Torres VE, Offord KP, Anderson CF, Velosa JA, Frohnert PP, Donadio JV, Jr., et al. Blood pressure determinants in living-related renal allograft donors and their recipients. *Kidney Int* 1987;31(6):1383-90.
5. Najarian JS, Chavers BM, McHugh LE, Matas AJ. 20 years or more of follow-up of living kidney donors. *Lancet* 1992;340(8823):807-10.
6. Smith MD, Kappell DF, Province MA, Hong BA, Robson AM, Dutton S, et al. Living-related kidney donors: a multicenter study of donor education, socioeconomic adjustment, and rehabilitation. *Am J Kidney Dis* 1986;8(4):223-33.
7. Miller IJ, Suthanthiran M, Riggio RR, Williams JJ, Riehle RA, Vaughan ED, et al. Impact of renal donation. Long-term clinical and biochemical follow-up of living donors in a single center. *Am J Med* 1985;79(2):201-8.
8. Levey AS, Eckardt KU, Tsukamoto Y, Levin A, Coresh J, Rossert J, et al. Definition and classification of chronic kidney disease: a position statement from Kidney Disease: Improving Global Outcomes (KDIGO). *Kidney Int* 2005;67(6):2089-100.
9. Levey AS, Coresh J, Greene T, Marsh J, Stevens LA, Kusek JW, et al. Expressing the Modification of Diet in Renal Disease Study equation for estimating glomerular filtration rate with standardized serum creatinine values. *Clin Chem* 2007;53(4):766-72.
10. Levey AS, Cattran D, Friedman A, Miller WG, Sedor J, Tuttle K, et al. Proteinuria as a surrogate outcome in CKD: report of a scientific workshop sponsored by the National Kidney Foundation and the US Food and Drug Administration. *Am J Kidney Dis* 2009;54(2):205-26.
11. Dindo D, Demartines N, Clavien PA. Classification of surgical complications: a new proposal with evaluation in a cohort of 6336 patients and results of a survey. *Ann Surg* 2004;240(2):205-13.
12. Wietlisbach V: Personal Communication (comparative data from MONICA to SOL-DHR using the same definition of hypertension) In: Fehrman-Ekholm and Thiel G.: Longterm risks after living kidney donation 2005 p 99-112 (Figure 7-6), ) In the book: Living Donor Kidney Transplantation; edited by Gaston R.S. and Wadström J (Taylor & Francis; London and New York;2005).

13. Wietlisbach V, Barazzoni F. [Outcome and analysis of participation in the 2d MONICA survey (1988-1989) of cardiovascular risk factors]. *Schweiz Med Wochenschr Suppl* 1993;48:13-20.
14. Wietlisbach V, Paccaud F, Rickenbach M, Gutzwiller F. Trends in cardiovascular risk factors (1984-1993) in a Swiss region: results of three population surveys. *Prev Med* 1997;26(4):523-33.
15. Bay WH, Hebert LA. The living donor in kidney transplantation. *Ann Intern Med* 1987;106(5):719-27.
16. Hakim RM, Goldszer RC, Brenner BM. Hypertension and proteinuria: long-term sequelae of uninephrectomy in humans. *Kidney Int* 1984;25(6):930-6.
17. Levey AS, Hou S, Bush HL, Jr. Kidney transplantation from unrelated living donors. Time to reclaim a discarded opportunity. *N Engl J Med* 1986;314(14):914-6.
18. Morris P, St George B, Waring T, Nanra R. Psychosocial complications in living related kidney donors: an Australian experience. *Transplant Proc* 1987;19(2):2840-4.
19. Narkun-Burgess DM, Nolan CR, Norman JE, Page WF, Miller PL, Meyer TW. Forty-five year follow-up after uninephrectomy. *Kidney Int* 1993;43(5):1110-5.
20. Penn I, Halgrimson CG, Ogden D, Starzl TE. Use of living donors in kidney transplantation in man. *Arch Surg* 1970;101(2):226-31.
21. Spital A. Living kidney donation: still worth the risk. *Transplant Proc* 1988;20(5):1051-8.
22. Talseth T, Fauchald P, Skrede S, Djoseoland O, Berg KJ, Stenstrom J, et al. Long-term blood pressure and renal function in kidney donors. *Kidney Int* 1986;29(5):1072-6.
23. Weiland D, Sutherland ER, Chavers BM, Simmons L, Ascher NL, Najarian JS. Information of 628 Living-related Kidney donors at a single institution, with long-term follow-up in 472 cases. *Transplant Proc* 1984;16:5-7.
24. Clemens K, Boudville N, Dew MA, Geddes C, Gill JS, Jassal V, et al. The Long-Term Quality of Life of Living Kidney Donors: A Multicenter Cohort Study. *Am J Transplant*;11(3):463-469.
25. Fehrman-Ekholm I, Elinder CG, Stenbeck M, Tyden G, Groth CG. Kidney donors live longer. *Transplantation* 1997;64(7):976-8.
26. Ibrahim HN, Foley R, Tan L, Rogers T, Bailey RF, Guo H, et al. Long-term consequences of kidney donation. *N Engl J Med* 2009;360(5):459-69.
27. Tan JC, Chertow GM. Cautious optimism concerning long-term safety of kidney donation. *N Engl J Med* 2009;360(5):522-3.
28. Bachmann A, Wolff T, Ruszat R, Giannini O, Dickenmann M, Gurke L, et al. Retroperitoneoscopic donor nephrectomy: a retrospective, non-randomized comparison of early complications, donor and recipient outcome with the standard open approach. *Eur Urol* 2005;48(1):90-6; discussion 96.

- 1  
2  
3  
4  
5  
6  
7  
8  
9  
10  
11  
12  
13  
14  
15  
16  
17  
18  
19  
20  
21  
22  
23  
24  
25  
26  
27  
28  
29  
30  
31  
32  
33  
34  
35  
36  
37  
38  
39  
40  
41  
42  
43  
44  
45  
46  
47  
48  
49  
50  
51  
52  
53  
54  
55  
56  
57  
58  
59  
60
29. Boudville N, Prasad GV, Knoll G, Muirhead N, Thiessen-Philbrook H, Yang RC, et al. Meta-analysis: risk for hypertension in living kidney donors. *Ann Intern Med* 2006;145(3):185-96.
  30. Capolicchio JP, Saemi A, Trotter S, Plante MK. Retroperitoneoscopic Nephrectomy With a Modified Hand-assisted Approach. *Urology*;77(3):607-11.
  31. Dols LF, Kok NF, Ijzermans JN. Live donor nephrectomy: a review of evidence for surgical techniques. *Transpl Int*;23(2):121-30.
  32. Dols LF, Kok NF, Terkivatan T, Tran TC, d'Ancona FC, Langenhuijsen JF, et al. Hand-assisted retroperitoneoscopic versus standard laparoscopic donor nephrectomy: HARP-trial. *BMC Surg*;10:11.
  33. Hoda MR, Greco F, Wagner S, Heynemann H, Fornara P. Prospective, nonrandomized comparison between right- and left-sided hand-assisted laparoscopic donor nephrectomy. *Transplant Proc*;43(1):353-6.
  34. Jacobs SC, Cho E, Dunkin BJ, Bartlett ST, Flowers JL, Jarrell B. Laparoscopic nephrectomy in the markedly obese living renal donor. *Urology* 2000;56(6):926-9.
  35. Kohei N, Kazuya O, Hirai T, Miyauchi Y, Iida S, Shirakawa H, et al. Retroperitoneoscopic living donor nephrectomy: experience of 425 cases at a single center. *J Endourol*;24(11):1783-7.
  36. Ma L, Ye J, Huang Y, Hou X, Zhao L, Wang G. Retroperitoneoscopic live-donor nephrectomy: 5-year single-center experience in China. *Int J Urol*;17(2):158-62.
  37. Troppmann C, Daily MF, McVicar JP, Troppmann KM, Perez RV. The transition from laparoscopic to retroperitoneoscopic live donor nephrectomy: a matched pair pilot study. *Transplantation*;89(7):858-63.
  38. Wadstrom J, Biglarnia A, Gjertsen H, Sugitani A, Fronck J. Introducing hand-assisted retroperitoneoscopic live donor nephrectomy: learning curves and development based on 413 consecutive cases in four centers. *Transplantation*;91(4):462-9.

STROBE Statement—Checklist of items that should be included in reports of *cohort studies*

|                              | Item No | Recommendation                                                                                                                                                                                                                                                                                                                                                                                                |
|------------------------------|---------|---------------------------------------------------------------------------------------------------------------------------------------------------------------------------------------------------------------------------------------------------------------------------------------------------------------------------------------------------------------------------------------------------------------|
| <b>Title and abstract</b>    | 1       | (a) Indicate the study's design with a commonly used term in the title or the abstract<br>(b) Provide in the abstract an informative and balanced summary of what was done and what was found                                                                                                                                                                                                                 |
| <b>Introduction</b>          |         |                                                                                                                                                                                                                                                                                                                                                                                                               |
| Background/rationale         | 2       | Explain the scientific background and rationale for the investigation being reported                                                                                                                                                                                                                                                                                                                          |
| Objectives                   | 3       | State specific objectives, including any prespecified hypotheses                                                                                                                                                                                                                                                                                                                                              |
| <b>Methods</b>               |         |                                                                                                                                                                                                                                                                                                                                                                                                               |
| Study design                 | 4       | Present key elements of study design early in the paper                                                                                                                                                                                                                                                                                                                                                       |
| Setting                      | 5       | Describe the setting, locations, and relevant dates, including periods of recruitment, exposure, follow-up, and data collection                                                                                                                                                                                                                                                                               |
| Participants                 | 6       | (a) Give the eligibility criteria, and the sources and methods of selection of participants. Describe methods of follow-up<br>(b) For matched studies, give matching criteria and number of exposed and unexposed                                                                                                                                                                                             |
| Variables                    | 7       | Clearly define all outcomes, exposures, predictors, potential confounders, and effect modifiers. Give diagnostic criteria, if applicable                                                                                                                                                                                                                                                                      |
| Data sources/<br>measurement | 8*      | For each variable of interest, give sources of data and details of methods of assessment (measurement). Describe comparability of assessment methods if there is more than one group                                                                                                                                                                                                                          |
| Bias                         | 9       | Describe any efforts to address potential sources of bias                                                                                                                                                                                                                                                                                                                                                     |
| Study size                   | 10      | Explain how the study size was arrived at                                                                                                                                                                                                                                                                                                                                                                     |
| Quantitative variables       | 11      | Explain how quantitative variables were handled in the analyses. If applicable, describe which groupings were chosen and why                                                                                                                                                                                                                                                                                  |
| Statistical methods          | 12      | (a) Describe all statistical methods, including those used to control for confounding<br>(b) Describe any methods used to examine subgroups and interactions<br>(c) Explain how missing data were addressed<br>(d) If applicable, explain how loss to follow-up was addressed<br>(e) Describe any sensitivity analyses                                                                                        |
| <b>Results</b>               |         |                                                                                                                                                                                                                                                                                                                                                                                                               |
| Participants                 | 13*     | (a) Report numbers of individuals at each stage of study—eg numbers potentially eligible, examined for eligibility, confirmed eligible, included in the study, completing follow-up, and analysed<br>(b) Give reasons for non-participation at each stage<br>(c) Consider use of a flow diagram                                                                                                               |
| Descriptive data             | 14*     | (a) Give characteristics of study participants (eg demographic, clinical, social) and information on exposures and potential confounders<br>(b) Indicate number of participants with missing data for each variable of interest<br>(c) Summarise follow-up time (eg, average and total amount)                                                                                                                |
| Outcome data                 | 15*     | Report numbers of outcome events or summary measures over time                                                                                                                                                                                                                                                                                                                                                |
| Main results                 | 16      | (a) Give unadjusted estimates and, if applicable, confounder-adjusted estimates and their precision (eg, 95% confidence interval). Make clear which confounders were adjusted for and why they were included<br>(b) Report category boundaries when continuous variables were categorized<br>(c) If relevant, consider translating estimates of relative risk into absolute risk for a meaningful time period |



|                          |    |                                                                                                                                                                            |
|--------------------------|----|----------------------------------------------------------------------------------------------------------------------------------------------------------------------------|
| Other analyses           | 17 | Report other analyses done—eg analyses of subgroups and interactions, and sensitivity analyses                                                                             |
| <b>Discussion</b>        |    |                                                                                                                                                                            |
| Key results              | 18 | Summarise key results with reference to study objectives                                                                                                                   |
| Limitations              | 19 | Discuss limitations of the study, taking into account sources of potential bias or imprecision. Discuss both direction and magnitude of any potential bias                 |
| Interpretation           | 20 | Give a cautious overall interpretation of results considering objectives, limitations, multiplicity of analyses, results from similar studies, and other relevant evidence |
| Generalisability         | 21 | Discuss the generalisability (external validity) of the study results                                                                                                      |
| <b>Other information</b> |    |                                                                                                                                                                            |
| Funding                  | 22 | Give the source of funding and the role of the funders for the present study and, if applicable, for the original study on which the present article is based              |

\*Give information separately for exposed and unexposed groups.

**Note:** An Explanation and Elaboration article discusses each checklist item and gives methodological background and published examples of transparent reporting. The STROBE checklist is best used in conjunction with this article (freely available on the Web sites of PLoS Medicine at <http://www.plosmedicine.org/>, Annals of Internal Medicine at <http://www.annals.org/>, and Epidemiology at <http://www.epidem.com/>). Information on the STROBE Initiative is available at <http://www.strobe-statement.org>.

## Prospective Swiss cohort study of living-kidney donors - Study protocol

Gilbert T. Thiel<sup>1</sup> \*, Christa Nolte<sup>1</sup>, Dimitrios Tsinalis<sup>2</sup>

[1]

SOL-DHR (Swiss Organ Living Donor Health Registry)

At the Division of Transplant Immunology and Nephrology in the  
University Hospital of Basel, Switzerland

[2]

SOL-DHR (Division of Nephrology),  
Kantonsspital St. Gallen, Switzerland)

### \* Corresponding Author

Professor Gilbert T. Thiel, University Hospital of Basel, SOL-DHR auf der Klinik Abteilung  
Transplantationsimmunologie und Nephrologie, Petersgraben 4, Basel, 4056 Switzerland

### e-mail Addresses:

Gilbert T. Thiel: [gil.thiel@unibas.ch](mailto:gil.thiel@unibas.ch)

Christa Nolte: [cnolte@uhbs.ch](mailto:cnolte@uhbs.ch)

Dimitrios Tsinalis: [dimitrios.tsinalis@kssg.ch](mailto:dimitrios.tsinalis@kssg.ch)

**ABSTRACT**

*Background* Offering living kidney donation raised the concern that donors are exposed to unknown risks. All Swiss transplant centres therefore decided to start a prospective cohort study of living kidney donors in Switzerland. This paper describes the rationale and set-up of this cohort.

*Methods/Design* All kidney donors in Switzerland are registered and examined before donation and biennially after donation starting in the first year after nephrectomy. In the lead-up of a follow-up visit, the study centre sends a little parcel to the kidney donor containing the health questionnaire, blood and urine tubes and a pre-paid envelope for sending the samples to the central laboratory. The donor makes an appointment with his family physician, who examines the donor and reports findings such as pain and other complains, blood pressure, creatinine, albumin and all major health events and the state of mental and social wellbeing to the study centre. All data are centrally managed. All abnormal findings in the follow-up of individual donors are regularly discussed with the principle investigator and all necessary measures are taken. Any intervention is stored in the database. The health-insurance of the organ-recipient covers all costs of the donor-follow-up. Main outcomes are the occurrence of albuminuria, hypertension and renal insufficiency. Secondary outcomes are major somatic and social events such as death, cardiovascular disease, stroke and depression.

*Discussion* This prospective cohort offers unique opportunities assessing the risks of living kidney donation and allows examining risk differences for all available methods used for nephrectomy in Switzerland (various forms of open surgery and endoscopic nephrectomy). Moreover, the prospective collection of all clinically relevant data and the monitoring of participants on a regular basis allow timely interventions at an early stage before critical parameters of kidney function or general health problems occur.

## BACKGROUND

Living kidney donors were used in Switzerland since 1967 but at a low rate. This, however, changed in the early nineties. Rapid expansion of live kidney transplantation took place especially in one large Swiss transplant centre, where live kidney was formerly strictly disapproved over two decades because of ethical reasons. But the rising number of live donor transplantation was not well accepted from all sides. A lawyer wrote in the Swiss Medical Journal that “organ removal from a living person for transplantation is an intended bodily injury according to civil and criminal law”<sup>1</sup>. Concerns were raised over the safety of live organ donation for the donors. The available published data from retrospective studies were largely incomplete. In these studies the percent of donors without follow up data ranged from 21%<sup>2,3</sup> to 31%<sup>4</sup>, to 42%<sup>5,6</sup> up to 77%<sup>7</sup>. Given the available evidence, any fair counselling of potential living donors seems difficult.

Since living donor transplantation was mainly propagated by the Basel transplant centre, we felt obliged to offer a long-time follow-up of the health state of living organ donors for all Swiss transplant centres. This idea was well accepted by the other five Swiss centres (Bern, Geneva, Lausanne, St. Gallen and Zürich) and consequently, the cohort study by the name of SOL-DHR (Swiss Organ Living Donor Health Registry) was initiated in April 1993.

This paper describes the rationale and set-up of this prospective cohort study aiming at assessing the prevalence of complications of living kidney donation and aiming at identifying risk profiles associated with unfavourable outcomes. In particular the study is designed to prospectively quantify the risks to donors after living kidney donation such as the development of hypertension, albuminuria, renal failure and psychological diseases and to assist in the management of individual donors at an early stage if such complications occur.

## METHODS / DESIGN

Prospective cohort study: There was an a priori consensus among the founding members that health state of all consenting eligible living kidney donors should be assessed life-long at regular time intervals in the context of a prospective cohort study. The protocol and the questionnaires were approved by the Ethical Committee of the University Hospital of Basel and the Swiss Academy of Medical Science (SAMW). No informed consent is required as lifelong follow-up of living donor's health state is required by the Swiss Transplant Law and as long as data are analysed anonymously. However, to assure compliance to the long term follow up protocol, donors are informed about the aims of the protocol and the registry before their donation. In addition, kidney donors have at any time after donation the option to quit their participation by simply ignoring the invitation from SOL-DHR to visit their family physician.

Donors from all six kidney transplant centres are included in the SOL-DHR. Until the end of 2010 a total of 1332 living kidney donors have been included (Basel n=521, Berne n=119, Geneva n=111, Lausanne n=151, St. Gallen n=79 and Zurich n=360).

### Main objectives

- Gaining prospective outcome data from living kidney donors in Switzerland
- Assess and quantify the risks for early and late complications due to organ removal
- Improve the information given to potential donors before agreeing to donate a kidney
- Install a system of timely intervention in case of deterioration in state of health
- Compare the consequences of different methods of organ removal on state of health
- Provide a neutral platform, where donors can express complains and receive help

## Data collection principles

Study inclusion and a first medical examination before kidney donation is done by the transplant centre (see basic medical questionnaire below). A second questionnaire (early complication questionnaire) is collected from the transplant centre at the time of discharge after nephrectomy. Thereafter the SOL-DHR centre organises a lifelong follow-up after nephrectomy at 1 year, 3 years, 5 years, 7 years, 10 years and biennially thereafter. The kidney donors are examined by their family physicians in the vicinity where they live. In the lead-up of a follow-up visit, the SOL-DHR centre sends a little parcel to the kidney donor asking the donor to make an appointment with the present family physician of his choice. The parcel contains the brief information for the donor and the family physician, a health questionnaire, tubes for blood and urine samples and a pre-paid envelope for sending the samples at room temperature to the central laboratory (Viollier AG Basel). The basic biennial follow up questionnaire is filled in by the family physician. Every five years the donor fills in the additional SF8 and social status questionnaire (see below).

If no response from the donor is received within 2 months, SOL-DHR initiates a search for the donor and attempts collecting possible data on donor death and its reason by contacting the recipient, the donor's health insurance and the public registries.

Results from the blood and urine analysis by the central laboratory are sent to the family physician and to the cohort manager.

## Participation of family physicians

Whereas kidney recipients live usually in the area of the transplant centre, kidney donors often do not. Asking donors to travel lifelong biennially to the distant transplant centre for

1  
2  
3 control has little chance to be followed, particularly since travel expenses are not covered.

4  
5 Follow-up controls done by the family physician working in the vicinity of the donor improve  
6  
7 donor's willingness to participate manifold. Family physicians as well as young medical  
8  
9 assistants at the transplant centre follow the protocols provided by the study centre.  
10  
11  
12

## 13 14 15 16 **Collected data**

### 17 18 19 *Laboratory data*

20  
21 We quantify creatinine in blood and urine, albumin and protein in urine. The method used to  
22  
23 quantify creatinine in blood changed over the years: 1993 -1996 Jaffee, 1997 -2003  
24  
25 enzymatic assay (Roche), 2004 – 2005 “Jaffe compensated” (Roche), 2006 – 2007 “Jaffe  
26  
27 corrected” (Siemens). Since September 2007 enzymatic assay (Siemens). In order to avoid  
28  
29 systematic errors due to different assays prior to the data base entry all values are converted to  
30  
31 values traceable to isotope dilution mass spectrometry (IDMS) as recommended by the  
32  
33 KDIGO consensus conference<sup>8</sup> using calibration data supplied by the assay's manufacturers  
34  
35 (data available on request). Albumin in urine is measured by turbidimetry after antigen-  
36  
37 antibody reaction using the endpoint method (Roche Diagnostics).  
38  
39  
40  
41

42  
43 Whenever during a follow-up a laboratory results (creatinine or albumin/creatinine ratio)  
44  
45 exceeds the expected range in an individual donor, the sampling and the laboratory analysis is  
46  
47 repeated.  
48  
49  
50

## 51 52 53 54 **Definitions**

### 55 56 57 *Estimation of the glomerular filtration rate (GFR)*

58  
59 To estimate GFR, we use the MDRD equation for IDMS-traceable creatinine values<sup>9</sup>  
60

1  
2  
3  
4  
5  
6  
7  
8  
9  
10  
11  
12  
13  
14  
15  
16  
17  
18  
19  
20  
21  
22  
23  
24  
25  
26  
27  
28  
29  
30  
31  
32  
33  
34  
35  
36  
37  
38  
39  
40  
41  
42  
43  
44  
45  
46  
47  
48  
49  
50  
51  
52  
53  
54  
55  
56  
57  
58  
59  
60

eGFR (mL/min/1.73 m<sup>2</sup>) =

$$175 \times (\text{Scr}/88.4)^{-1.154} \times (\text{Age})^{-0.203} \times (0.742^*) \times (1.212^+) * \text{If female} + \text{If African}$$

*Micro-albuminuria (= high albumin excretion)*

We assume a daily urinary excretion of 10 mmol Creatinin/24h as being normal for donors (mean value for both genders taken together, - underestimating it for males, overestimating for females). Data on albuminuria will be presented based on cut-off points defined by the report of the scientific workshop sponsored by the National Kidney Foundation and the US Food and Drug Administration.<sup>10</sup> The cut-off-point for albumin excretion to be called micro-albuminuria or high albumin excretion is set to > 30 mg albumine / g creatinine corresponding to  $\geq 3.3$  mg albumin / mmol creatinine. For clarity reasons we will use the term micro-albuminuria which is commonly used in Europe rather than the term “high albumin excretion” used in North America. For the definition of macro-albuminuria or very high albumine excretion at cut-off point of >300 mg albumin / g creatinine corresponding to 33.9 mg albumin / mmol creatinine is used.

*Hypertension*

Donors having a systolic pressure above 140 mm Hg or diastolic above 90 mmHg or both or taking any antihypertensive drug are classified as hypertensive. In any case of new onset hypertension, we ask the family physician to perform a 24h pressure recording. If hypertension is confirmed, we recommend antihypertensive treatment with ACEI or an Angiotensin receptor antagonist (ARA).

**Health state data**



1  
2  
3 At each visit, the family physician is asked to measure the actual weight, height and blood  
4  
5 pressure (3 times in sitting position). Moreover he is requested to examine the bare abdomen  
6  
7 of the donor in an upright posture in order to look for an incisional hernia or abdominal wall  
8  
9 bulging caused by the nephrectomy. When the donor is complaining about pain at any specific  
10  
11 place (i.e. lumbar back pain), it should be examined and evaluated, whether it is or could be  
12  
13 causally related to nephrectomy. New complains, disease or any problems (somatic, mental,  
14  
15 social) need to be mentioned carefully in a separate line of the form.  
16  
17  
18  
19  
20  
21  
22

### 23 *Questionnaires*

- 24  
25  
26 - The basic medical questionnaire to be collected before donation:

27  
28 The basic medical questionnaire collects information on body weight, sitting blood  
29  
30 pressure (3 times), description of the nephrectomy scare, pain or new problems since  
31  
32 the last examination and an inventory of all drugs currently taken. The questionnaire  
33  
34 before donation also includes “major disease and back pain”, since we realize that  
35  
36 back pain is such a common complaint that we need information before donation in  
37  
38 order classify back pain after donation in a meaningful way.  
39  
40  
41  
42

- 43  
44 - Early complication questionnaire to be collected at the time of hospital discharge after  
45  
46 nephrectomy (since 1998):

47  
48 This questionnaire is collecting data on the side and method used for nephrectomy and  
49  
50 all complications occurring peri- and postoperatively including blood-transfusions,  
51  
52 whether the endoscopic procedure had to be changed intraoperatively and whether  
53  
54 surgical revision was necessary. Early postoperative pain, which reflects pain at the  
55  
56 site of incision and sometimes in case of endoscopic nephrectomy additional shoulder  
57  
58 pain do to body positioning during surgery, is assessed using the visual analogue  
59  
60 scale. The questionnaire is filled out usually 2 weeks after nephrectomy. For grading

1  
2  
3 early complications we use the Clavien-Scale <sup>11</sup>. Every early complication observed in  
4 a donor is classified along the Clavien scale (Grade 1 =1, grade II=2, grade IIIa =3,  
5 grade IIIb=3.5, grade IVa=4, grade IVb=4.5 etc.). If multiple complications occur in  
6 the same donor, the single Clavien scores are added to what is called the Clavien-Sum  
7 per donor score as compared to the simple sum of observed complications per donor  
8 score. The two sums have different interpretations. For a given (sub) population of  
9 donors, i.e. older than 60 years, the “mean sum of complications” shows the frequency  
10 of early complications seen in elderly donors, the mean Clavien sum” however, their  
11 severity.

12  
13  
14  
15  
16  
17  
18  
19  
20  
21  
22  
23  
24  
25 - The basic biennial follow up questionnaire

26  
27 The family physician is requested to measure body weight, sitting blood pressure (3  
28 times), examine the nephrectomy scare and to ask the donor all questions necessary to  
29 file-out the medical questionnaire including questions about pain and all serious health  
30 problems including major events such as stroke, cardiovascular events, diabetes or  
31 malignancies since the last examination. Back-pain is considered as nephrectomy  
32 related only if specified by the donor or his physician as being clearly more intensive  
33 than before donation as pain related to nephrectomy can be caused by instability of the  
34 abdominal wall after large lumbar incision with partial muscular palsy. Furthermore  
35 the family physician is asked to note all drugs currently taken; make a dip-stick  
36 examination of the urine and finally fill a blood and a urine tube and send both tubes  
37 to the central laboratory. If the urinary dip stick turns out to be positive for blood,  
38 protein, white blood cells and other abnormalities, the doctor has to make an  
39 additional microscopic examination of the urinary sediment. All clinical data,  
40 including the health state questionnaire, are sent to the study centre SOL-DHR.  
41  
42  
43  
44  
45  
46  
47  
48  
49  
50  
51  
52  
53  
54  
55  
56  
57  
58  
59  
60

- 1  
2  
3 - SF-8 questionnaire to be collected every 5 years after donation (since 2002).  
4

5 The validated SF-8 multiple choice questionnaire was used to calculate the Physical  
6 Component Summary (PCS) and the Mental Component Summary (MCS).  
7

8 The questionnaire was supplemented by the three following multiple choice questions:  
9

10 1) In comparison to the last year how would you describe your actual health? 2) How  
11 has your emotional relation to the kidney recipient changed since donation? 3) Would  
12 you donate a kidney again, if you still had two kidneys?. The answers to these  
13 questions are analysed separately from the 8 SF-8 questions.  
14

- 15  
16  
17  
18  
19  
20  
21  
22  
23 - Social status questionnaire (since 2002).  
24

25 This instrument has been developed by SOL-DHR and contains multiple choice  
26 questions about the actual professional activity, working capacity, efficiency, and  
27 physical fitness and two open questions: 1) draw backs because of donation (e.g.  
28 financial, insurance, pension fund or professional disadvantages) and 2) donor's  
29 suggestion on possible improvement for the SOL-DHR activity (What can SOL-DHR  
30 do better for you?)  
31  
32  
33  
34  
35  
36  
37  
38  
39  
40  
41  
42

### 43 **Data monitoring and quality assurance**

44 All incoming data are checked by cohort staff for completeness and plausibility, and are  
45 entered thereafter into an electronic database. In case of lacking information, staff calls to the  
46 office of the family physician and tries to receive any missing data. All cases with an  
47 abnormality are discussed with the principle investigator once or twice a month. Urgent cases  
48 are discussed immediately and interventions are initiated without delay. All outcomes are  
49 stored within the database.  
50  
51  
52  
53  
54  
55  
56  
57  
58  
59  
60

The “principle of intervention” is a key feature of this cohort study. Thus, we do not only observe our cohort, but we also intervene actively, as soon as any potential danger is turning

1  
2  
3 up. Interventions are planned to be provided by the family physician based on the  
4  
5 recommendation of the study leaders. Recommendations may include performing a diagnostic  
6  
7 procedure like the 24h blood-pressure measurement in order to confirm hypertension or to  
8  
9 perform a sonography of the remaining kidney or simply to repeat the chemical analysis. The  
10  
11 letter may also contain a recommendation for treatment.  
12  
13  
14  
15  
16  
17

### 18 **Funding of SOL-DHR and Reimbursement for follow-up examinations**

19  
20 The SOL-DHR expenses are funded by the Swiss Foundation for the follow-up care of living  
21  
22 organ donors (SNO). The SNO is supported by the government, research and industry funds  
23  
24 as well as the Swiss Society of Nephrology. The detailed list of sponsors is given at the end of  
25  
26 the manuscript. The running costs of SOL-DHR are kept low as organisation and medical  
27  
28 activities of SOL-DHR are provided on a volunteer base by GT since 1993 and DT since  
29  
30 2000.  
31  
32  
33  
34  
35

36 The basic concept is to cover the costs of kidney donor follow-up via the insurance company  
37  
38 of the kidney recipient, because they would have to pay the dialysis costs if no living donation  
39  
40 had taken place. Coverage includes all costs including those of late complications of the donor  
41  
42 that are causally related to the donation. Hence, the Swiss transplant law requires the health  
43  
44 insurances of the kidney recipients to cover the bills from the family physicians for biennial  
45  
46 donor follow-up as long as the recipient stays alive with an official pay scale. After recipients  
47  
48 death the bills for the donor follow-up are covered by SNO. The bills for the donor follow-up  
49  
50 examination are sent to the SOL-DHR headquarter, which forwards the bill to the health  
51  
52 insurance of the kidney recipient. The costs for the chemical analysis in blood and urine of  
53  
54 donors are covered by the Violliers AG Basel. Cost for drugs required by the donor are paid  
55  
56 by the compulsory health insurance of the donor independently whether the drug treatment is  
57  
58 related to donation or not.  
59  
60

### Handling missing responses

If within 2 months no response is received after invitation (neither a filled out questionnaire from the donor nor the family physician or laboratory) SOL-DHR staff calls the donor. If the donor declares, that he does not longer want to participate he or she will be marked “inactive” in the cohort database and follow-up is suspended. If the donor, however, changes his or her mind, and gets in touch with us again (i.e. after moving back to Switzerland) the status is changed back to “active” immediately at any time.

### Control population

To control for the risk of developing hypertension we plan using two different reference groups. First, we will compare the frequency of occurrence of hypertension in our cohort to that of the MONICA-study with data from a normal Swiss population.<sup>12-14</sup> Second, since living donors are a positive selection out of the normal population we consider them to be “healthier” than the normal population resulting in a potential underreporting of health risks. To directly compare the normal outcome of such a healthy cohort, pooled data from the SOL-DHR’s own healthy donor population taken prior to nephrectomy is used to analyse the outcome of this positively selected donor population after donation.

### Statistical Considerations

Epidemiologic data and patients' descriptives available on continuous scales will be presented with medians, interquartile ranges or means and standard deviations as appropriate. Categorical data will be presented as rates and percentages. Association of individual (independent) variables on the outcome variables will be reported using correlation

1  
2  
3 coefficients. Main outcomes are the occurrence of albuminuria, hypertension and renal  
4  
5 insufficiency as specified above. Secondary outcomes are major somatic and social events  
6  
7 such as death, cardiovascular disease, stroke and depression collected from the questionnaires.  
8  
9

10 All outcomes are considered to be dichotomous.  
11

12  
13 Results from univariate analysis will inform multivariate modelling. Assessment of causal  
14  
15 associations will be performed using multivariate models including potential confounders  
16  
17 along with the independent variables of interest. Prognostic scores will be built using either  
18  
19 multivariate logistic regression analysis or Cox proportional hazard models. Models will be  
20  
21 validated in cross samples. Calibration and discrimination of the cross-validated prognostic  
22  
23 instruments will be assessed using the Brier Score. Time-Series analysis will be performed  
24  
25 using random effects regression models where appropriate.  
26  
27  
28  
29  
30  
31  
32

### 33 Sample Size Calculations 34

35  
36 The analysis is based on the example of hypertension: We assume that 1 additional kidney  
37  
38 donor out of 15 (controls) will develop hypertension. We further assume a follow-up after the  
39  
40 accrual interval of 10 years. Prior data indicate that the median survival time on the control  
41  
42 treatment is 5 years. If the true median survival times on the control and experimental  
43  
44 treatments are 5 and 10 years, respectively, we will need to study 29 subjects developing  
45  
46 hypertension and 435 control subjects to be able to reject the null hypothesis that the  
47  
48 experimental (post surgery) and control (pre-surgery) survival curves are equal with  
49  
50 probability (power) 80%. The Type I error probability associated with this test of this null  
51  
52 hypothesis is 0.05.  
53  
54  
55  
56  
57  
58  
59  
60

## Discussion

This paper describes the rationale and set-up of a lifelong prospective cohort study of living kidney donors in Switzerland. This study offers unique opportunities assessing the frequency of occurrence of unfavourable outcomes following donation and allows determining risk factors associated to them. More specifically, we are particularly interested increasing our understanding of the long term effect of donation on renal function, the risk to develop hypertension or abuminuria and to explore whether adverse outcomes depend on the method of nephrectomy applied. Moreover, the systematic collection of all clinically relevant data and the monitoring of participants on a regular basis allow timely interventions if critical parameters of kidney function or general health change for the worse.

An overview of the existing evidence

In the eighties and early nineties many interesting papers were already available<sup>2-7 15-23</sup>. They all tried to quantify the morbidity and mortality of living kidney donation or unilateral nephrectomy. Most data derive from single centres in the USA, some from Norway or Australia. Unfortunately all published data were collected retrospectively resulting in incomplete data sets and data are prone to selection bias. Based on these retrospective studies kidney donation is now generally accepted as a relatively safe procedure but long-term data that are still quite incomplete<sup>24-27</sup>.

Up to now prospective long-term follow-up of living donors has not been regarded generally as a necessity. The advantage of a prospective long-term follow-up study of living donors as set out in the present protocol is not only likely to improve the quality of the data sets regarding the short term safety of living kidney donation but allows also for a timely intervention if an individual donor experience a potential problem. This will provide important data to clarify the potential need and requirements of long-term donor follow-up.

1  
2  
3  
4  
5  
6 In addition, new questions such as the effect of various surgical techniques have risen  
7  
8 recently. Several methods of endoscopic (including robotic assisted) nephrectomy have been  
9  
10 introduced and have shown to be relatively safe<sup>28-38</sup>. Single centre reports are mainly  
11  
12 defending their own used technology<sup>30 33-36</sup>. Bottom line however, countrywide prospective  
13  
14 cohorts allowing a comparison of various surgical procedures are yet unavailable or in an  
15  
16 early phase comparing no more than two methods<sup>32</sup>.  
17  
18  
19

20  
21 The question whether kidney donation increases the risk for hypertension, which was already  
22  
23 on debate in the eighties<sup>4 16 22</sup>, is still unsettled due to limited studies<sup>29</sup>. We think that the  
24  
25 results of this large national wide prospective cohort study will answer many still open  
26  
27 questions concerning living kidney donor outcome.  
28  
29  
30  
31  
32  
33  
34  
35  
36  
37  
38  
39  
40  
41  
42  
43  
44  
45  
46  
47  
48  
49  
50  
51  
52  
53  
54  
55  
56  
57  
58  
59  
60



## References

1. Butz K. Organ transplantation from the lawyer's viewpoint. *Schw. Ärztezeitschrift* 1987;68:1826-1829.
2. Dunn JF, Nylander WA, Jr., Richie RE, Johnson HK, MacDonell RC, Jr., Sawyers JL. Living related kidney donors. A 14-year experience. *Ann Surg* 1986;203(6):637-43.
3. Westlie L, Fauchald P, Talseth T, Jakobsen A, Flatmark A. Quality of life in Norwegian kidney donors. *Nephrol Dial Transplant* 1993;8(10):1146-50.
4. Torres VE, Offord KP, Anderson CF, Velosa JA, Frohnert PP, Donadio JV, Jr., et al. Blood pressure determinants in living-related renal allograft donors and their recipients. *Kidney Int* 1987;31(6):1383-90.
5. Najarian JS, Chavers BM, McHugh LE, Matas AJ. 20 years or more of follow-up of living kidney donors. *Lancet* 1992;340(8823):807-10.
6. Smith MD, Kappell DF, Province MA, Hong BA, Robson AM, Dutton S, et al. Living-related kidney donors: a multicenter study of donor education, socioeconomic adjustment, and rehabilitation. *Am J Kidney Dis* 1986;8(4):223-33.
7. Miller IJ, Suthanthiran M, Riggio RR, Williams JJ, Riehle RA, Vaughan ED, et al. Impact of renal donation. Long-term clinical and biochemical follow-up of living donors in a single center. *Am J Med* 1985;79(2):201-8.
8. Levey AS, Eckardt KU, Tsukamoto Y, Levin A, Coresh J, Rossert J, et al. Definition and classification of chronic kidney disease: a position statement from Kidney Disease: Improving Global Outcomes (KDIGO). *Kidney Int* 2005;67(6):2089-100.
9. Levey AS, Coresh J, Greene T, Marsh J, Stevens LA, Kusek JW, et al. Expressing the Modification of Diet in Renal Disease Study equation for estimating glomerular filtration rate with standardized serum creatinine values. *Clin Chem* 2007;53(4):766-72.
10. Levey AS, Cattran D, Friedman A, Miller WG, Sedor J, Tuttle K, et al. Proteinuria as a surrogate outcome in CKD: report of a scientific workshop sponsored by the National Kidney Foundation and the US Food and Drug Administration. *Am J Kidney Dis* 2009;54(2):205-26.
11. Dindo D, Demartines N, Clavien PA. Classification of surgical complications: a new proposal with evaluation in a cohort of 6336 patients and results of a survey. *Ann Surg* 2004;240(2):205-13.
12. Wietlisbach V: Personal Communication (comparative data from MONICA to SOL-DHR using the same definition of hypertension) In: Fehrman-Ekholm and Thiel G.: Longterm risks after living kidney donation 2005 p 99-112 (Figure 7-6), ) In the book: Living Donor Kidney Transplantation; edited by Gaston R.S. and Wadström J (Taylor & Francis; London and New York;2005).
13. Wietlisbach V, Barazzoni F. [Outcome and analysis of participation in the 2d MONICA survey (1988-1989) of cardiovascular risk factors]. *Schweiz Med Wochenschr Suppl* 1993;48:13-20.
14. Wietlisbach V, Paccaud F, Rickenbach M, Gutzwiller F. Trends in cardiovascular risk factors (1984-1993) in a Swiss region: results of three population surveys. *Prev Med* 1997;26(4):523-33.

15. Bay WH, Hebert LA. The living donor in kidney transplantation. *Ann Intern Med* 1987;106(5):719-27.
16. Hakim RM, Goldszer RC, Brenner BM. Hypertension and proteinuria: long-term sequelae of uninephrectomy in humans. *Kidney Int* 1984;25(6):930-6.
17. Levey AS, Hou S, Bush HL, Jr. Kidney transplantation from unrelated living donors. Time to reclaim a discarded opportunity. *N Engl J Med* 1986;314(14):914-6.
18. Morris P, St George B, Waring T, Nanra R. Psychosocial complications in living related kidney donors: an Australian experience. *Transplant Proc* 1987;19(2):2840-4.
19. Narkun-Burgess DM, Nolan CR, Norman JE, Page WF, Miller PL, Meyer TW. Forty-five year follow-up after uninephrectomy. *Kidney Int* 1993;43(5):1110-5.
20. Penn I, Halgrimson CG, Ogden D, Starzl TE. Use of living donors in kidney transplantation in man. *Arch Surg* 1970;101(2):226-31.
21. Spital A. Living kidney donation: still worth the risk. *Transplant Proc* 1988;20(5):1051-8.
22. Talseth T, Fauchald P, Skrede S, Djoseand O, Berg KJ, Stenstrom J, et al. Long-term blood pressure and renal function in kidney donors. *Kidney Int* 1986;29(5):1072-6.
23. Weiland D, Sutherland ER, Chavers BM, Simmons L, Ascher NL, Najarian JS. Information of 628 Living-related Kidney donors at a single institution, with long-term follow-up in 472 cases. *Transplant Proc* 1984;16:5-7.
24. Clemens K, Boudville N, Dew MA, Geddes C, Gill JS, Jassal V, et al. The Long-Term Quality of Life of Living Kidney Donors: A Multicenter Cohort Study. *Am J Transplant*;11(3):463-469.
25. Fehrman-Ekholm I, Elinder CG, Stenbeck M, Tyden G, Groth CG. Kidney donors live longer. *Transplantation* 1997;64(7):976-8.
26. Ibrahim HN, Foley R, Tan L, Rogers T, Bailey RF, Guo H, et al. Long-term consequences of kidney donation. *N Engl J Med* 2009;360(5):459-69.
27. Tan JC, Chertow GM. Cautious optimism concerning long-term safety of kidney donation. *N Engl J Med* 2009;360(5):522-3.
28. Bachmann A, Wolff T, Ruzsat R, Giannini O, Dickenmann M, Gurke L, et al. Retroperitoneoscopic donor nephrectomy: a retrospective, non-randomized comparison of early complications, donor and recipient outcome with the standard open approach. *Eur Urol* 2005;48(1):90-6; discussion 96.
29. Boudville N, Prasad GV, Knoll G, Muirhead N, Thiessen-Philbrook H, Yang RC, et al. Meta-analysis: risk for hypertension in living kidney donors. *Ann Intern Med* 2006;145(3):185-96.
30. Capolicchio JP, Saemi A, Trotter S, Plante MK. Retroperitoneoscopic Nephrectomy With a Modified Hand-assisted Approach. *Urology*;77(3):607-11.
31. Dols LF, Kok NF, Ijzermans JN. Live donor nephrectomy: a review of evidence for surgical techniques. *Transpl Int*;23(2):121-30.
32. Dols LF, Kok NF, Terkivatan T, Tran TC, d'Ancona FC, Langenhuijsen JF, et al. Hand-assisted retroperitoneoscopic versus standard laparoscopic donor nephrectomy: HARP-trial. *BMC Surg*;10:11.

- 1  
2  
3 33. Hoda MR, Greco F, Wagner S, Heynemann H, Fornara P. Prospective, nonrandomized  
4 comparison between right- and left-sided hand-assisted laparoscopic donor  
5 nephrectomy. *Transplant Proc*;43(1):353-6.  
6  
7 34. Jacobs SC, Cho E, Dunkin BJ, Bartlett ST, Flowers JL, Jarrell B. Laparoscopic  
8 nephrectomy in the markedly obese living renal donor. *Urology* 2000;56(6):926-9.  
9  
10 35. Kohei N, Kazuya O, Hirai T, Miyauchi Y, Iida S, Shirakawa H, et al.  
11 Retroperitoneoscopic living donor nephrectomy: experience of 425 cases at a single  
12 center. *J Endourol*;24(11):1783-7.  
13  
14 36. Ma L, Ye J, Huang Y, Hou X, Zhao L, Wang G. Retroperitoneoscopic live-donor  
15 nephrectomy: 5-year single-center experience in China. *Int J Urol*;17(2):158-62.  
16  
17 37. Troppmann C, Daily MF, McVicar JP, Troppmann KM, Perez RV. The transition from  
18 laparoscopic to retroperitoneoscopic live donor nephrectomy: a matched pair pilot  
19 study. *Transplantation*;89(7):858-63.  
20  
21 38. Wadstrom J, Biglarnia A, Gjertsen H, Sugitani A, Fronek J. Introducing hand-assisted  
22 retroperitoneoscopic live donor nephrectomy: learning curves and development based  
23 on 413 consecutive cases in four centers. *Transplantation*;91(4):462-9.  
24  
25  
26  
27  
28  
29  
30  
31  
32  
33  
34  
35  
36  
37  
38  
39  
40  
41  
42  
43  
44  
45  
46  
47  
48  
49  
50  
51  
52  
53  
54  
55  
56  
57  
58  
59  
60

### Competing interests

The authors declare that they have no competing interests.

### Authors' contributions

Professor Thiel was involved in the conception and design of the study, drafted the protocol, supervised the revisions and approved the final manuscript. Dr. Tsinalis was involved in conception and design of this study, revised the draft critically for intellectual content and approved the final revised manuscript. Ms Nolte was involved in the conception of the study, revised the draft critically for intellectual content and approved the final manuscript.

### Acknowledgments

We are indebted to the medical / surgical team and the transplant coordinators of the Transplant Centres of Basel, Bern, Geneva, Lausanne, St. Gallen and Zürich. We would like to thank Ruth Lützel Schwab and Christina Wolf-Heidegger for secretarial help. Also, we are grateful to Thomas Voegelé (Transplant coordinator) for his initial participation, when SOL-DHR was started (1993) and to Hanspeter Hort (graphic artist) for designing the SOL-DHR logo for free. We thank Guy Kollwelter and Heinz Herrmann (both from Astellas) for providing us with medals and individual diplomas for living donors.

This study receives funding from various sponsors (see below). The funding bodies had no role in study design, in the collection, analysis and interpretation of data in the writing of the manuscripts and in the decision to submit the manuscript for publication.

### Main Sponsors:

Viollier AG, Novartis Pharma Schweiz AG, Alfred and Erika Baer-Spycher-Stiftung, Astellas Pharma AG, Fresenius Medical care (Switzerland) AG, Roche Pharma (Switzerland) AG

### Regular Sponsors:

1  
2  
3 AMGEN (Switzerland) AG, Fresenius Biotech GmbH, Wyeth Pharmaceuticals AG, Spirig  
4  
5  
6 Pharma AG, diverse private Sponsors  
7

8 **Other Sponsors:**  
9

10  
11 Schweizerische Gesellschaft für Nephrologie SGN, Bundesamt für Gesundheit, HP Hort,  
12  
13 Pfizer AG, Sanofi-Aventis (Switzerland) AG, Genzyme GmbH, H.U. Böhi, P. Roth Yin Yee,  
14  
15 Oliver Boidol, B. Braun Medical AG, Schweizer Nierenliga, Gambro Hospal (Switzerland)  
16  
17  
18 AG, Baxter AG.  
19  
20  
21  
22  
23  
24  
25  
26  
27  
28  
29  
30  
31  
32  
33  
34  
35  
36  
37  
38  
39  
40  
41  
42  
43  
44  
45  
46  
47  
48  
49  
50  
51  
52  
53  
54  
55  
56  
57  
58  
59  
60
